# Supplementary material for: In Silico Pleiotropy Analysis in KEGG Signaling Networks Using a Boolean Network Model
Source: MDPI journal article supplement (doi:10.3390/biom12081139), 2022-08-18
Supplement: s1 [file s1]

# **In silico Pleiotropy Analysis in KEGG Signaling Networks Using a Boolean Network Model**

**Maulida Mazaya <sup>1,†</sup> and Yung-Keun Kwon <sup>2,\*</sup>**

<sup>1</sup> Research Center for Computing, National Research and Innovation Agency (BRIN), Cibinong Science Center, Jl. Raya Jakarta - Bogor KM 46, Cibinong 16911, West Java, Indonesia

<sup>2</sup> School of IT Convergence, University of Ulsan, 93 Daehak-ro, Nam-gu, Ulsan 44610, Korea

\* Correspondence: kwonyk@ulsan.ac.kr

† This author is the main contributor to this work.

## Supporting Text

### Nested Canalizing Function

The implementation of a *Nested Canalizing Functions* (NCFs) model [1,2] was to describe Boolean function update rules. Given a Boolean network  $G(V, A)$ , the value of each variable  $v_i$  at time  $t + 1$  is determined by the values of  $k_i$  other variables  $v_{i_1}, v_{i_2}, \dots, v_{i_{k_i}}$  with a link to  $v_i$  at time  $t$  by the Boolean function  $f_i$ :  $v_i(t + 1) = f_i(v_{i_1}(t), v_{i_2}(t), \dots, v_{i_{k_i}}(t))$ . The rule  $f_i$  is called *canalizing* on the input variable  $v_{i_m}$  if there exist Boolean values,  $I_m$  and  $O_m$ , such that

$$v_{i_m}(t) = I_m \rightarrow v_i(t + 1) = O_m. \quad (1)$$

Then,  $I_m$  and  $O_m$  are called the canalizing and canalized values for the output variable  $v_i$ , respectively. Note that NCFs are a natural subset of canalizing rules. It was inspired by a question of what happens in the non-canalizing case: *When a rule is not canalized by the value of the first input variable, is it canalized by one of the remaining input variables?* The answer is this consecutive canalization test can be repeated for all inputs. Therefore, an NCF to update  $v_i$  can be represented as follows:

$$f_i(v_{i_1}(t), v_{i_2}(t), \dots, v_{i_{k_i}}(t)) = \begin{cases} O_1 & \text{if } v_{i_1}(t) = I_1 \\ O_2 & \text{if } v_{i_1}(t) \neq I_1 \text{ and } v_{i_2}(t) = I_2 \\ O_3 & \text{if } v_{i_1}(t) \neq I_1 \text{ and } v_{i_2}(t) \neq I_2 \text{ and } v_{i_3}(t) = I_3 \\ & \vdots \\ O_{k_i} & \text{if } v_{i_1}(t) \neq I_1 \dots v_{i_{k_i-1}}(t) \neq I_{k_i-1} \text{ and } v_{i_{k_i}}(t) = I_{k_i} \\ O_{def} & \text{otherwise} \end{cases} \quad (2)$$

where all  $I_m$  and  $O_m$  ( $m = 1, 2, \dots, k_i$ ) denote the canalizing and canalized Boolean values, respectively, and  $O_{def}$  is generally set to  $1 - O_{k_i}$ . In this works, each NCF is randomized by specifying every  $I_m$  and  $O_m$  between 0 and 1 uniformly at random. In addition, we are independently and randomly specified  $O_1, \dots, O_{k_i}$  values with the probabilities

$$P(O_m = 1) = \frac{\exp(-2^{-m}\theta)}{1 + \exp(-2^{-m}\theta)} \quad (3)$$

where  $\theta$  is a constant. On the other hand, the value of  $I_m$  is deterministically specified by the value of  $O_m$  and the sign of the interaction from  $v_{i_m}$  to  $v_i$  ( $m = 1, \dots, k_i$ ) that can be seen in Table 2.1.

**Table 2.1 NCFs specification of  $I_m$  and  $O_m$** 

| $O_m$ | <i>Sign of the interaction from <math>v_{i_m}</math> to <math>v_i</math></i> | $I_m$ |
|-------|------------------------------------------------------------------------------|-------|
| 1     | Positive ( $v_{i_m} \rightarrow v_i$ )                                       | 1     |
| 1     | Negative ( $v_{i_m} \dashv v_i$ )                                            | 0     |
| 0     | Positive ( $v_{i_m} \rightarrow v_i$ )                                       | 0     |
| 0     | Negative ( $v_{i_m} \dashv v_i$ )                                            | 1     |

We note that NCFs have been shown to properly fit real biological experimental data [2,3] and many molecular interactions and analysis were successfully represented by NCFs [4-7]. For example, 133 out of 139 rules compiled from a dataset about a transcriptional regulatory network [5] or 39 out of 42 rules inferred from a signaling pathway dataset [4]. In addition, NCFs also support gene-gene pleiotropy analysis [8]. Those imply that NCFs-embedded random networks can describe the network dynamics considerably similarly to those real biological networks.

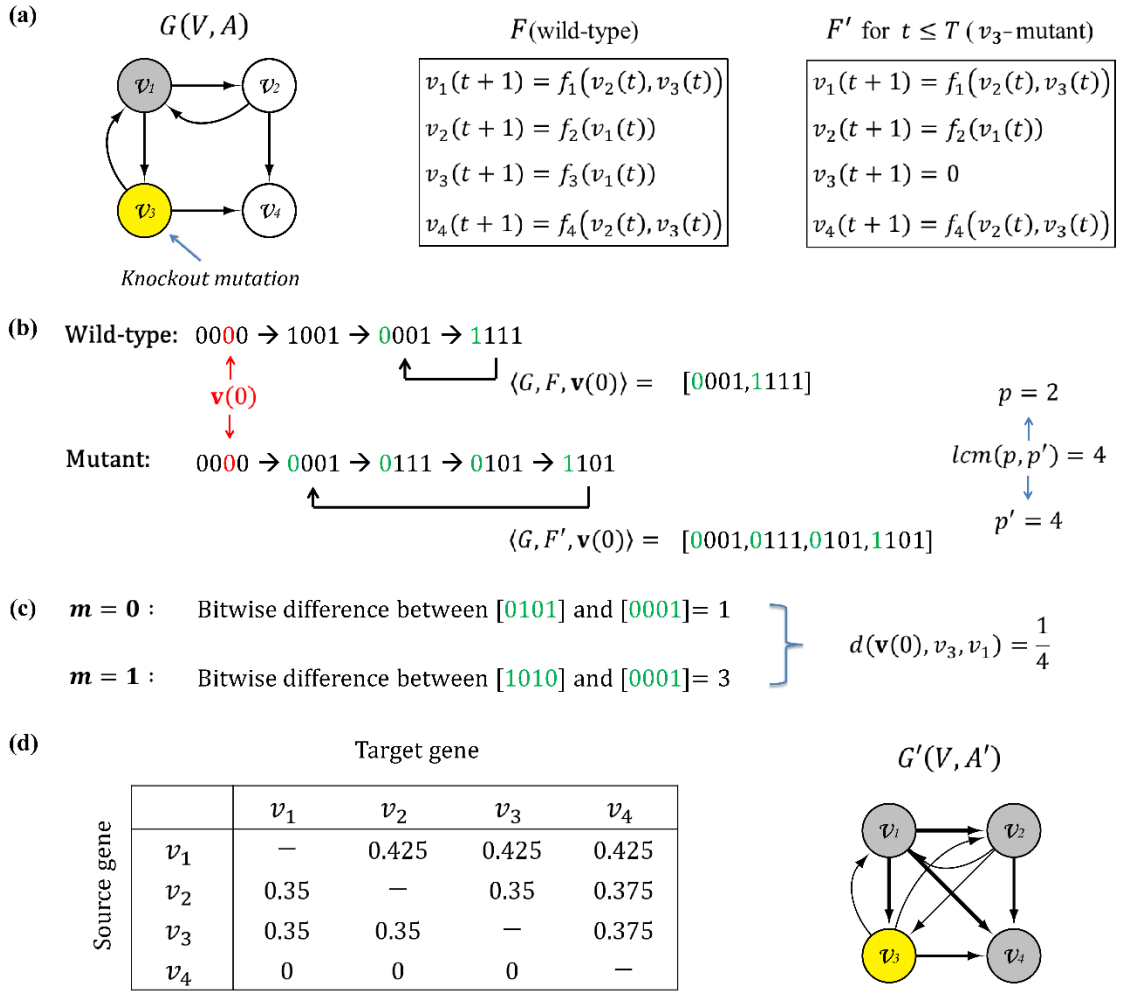

**Figure S1.** Dynamics influence computation example [9].

(a) An example GMI network. Given a network  $G(V, A)$  with a set of update rules  $F$ , let  $v_3$  a node subjected to the knockout mutation for  $t \leq T$ . The knockout mutation changes  $F$  into  $F'$  where the state value of  $v_3$  is frozen to 0 for  $t \leq T$ . (b) Identification of wild-type and mutant attractors. Let  $[0000] \in S$  be an initial state considered in this example. By examining two state trajectories along with  $F$  and  $F'$ , respectively, obtain two corresponding attractors,  $\langle G, F, v(0) \rangle$  and  $\langle G, F', v(0) \rangle$  of which the *least common multiple* of the lengths is four. (c) Computation of a distance between wild-type and mutant attractors. Since the *greatest common divisor* of the lengths of two attractors is two, examine two different alignments of the state sequences of  $v_1$  in those attractors. The number of different bits between  $[0101]$  and  $[0001]$  is 1 in case 1 ( $m = 0$ ), whereas that between  $[1010]$  and  $[0001]$  is 3 in case 2 ( $m = 1$ ). Accordingly, the minimum bitwise difference is 1, and hence  $d(v(0), v_3, v_1) = \frac{1}{4}$ . Finally, compute  $\mu(v_3, v_1)$  by averaging out  $d(v(0), v_3, v_1)$  over the set of initial states. (d) The resultant GDI network. The left matrix shows the dynamics influence value for every ordered pair of genes, and the right graph shows the resultant GDI network with nine positive dynamics influence relations.

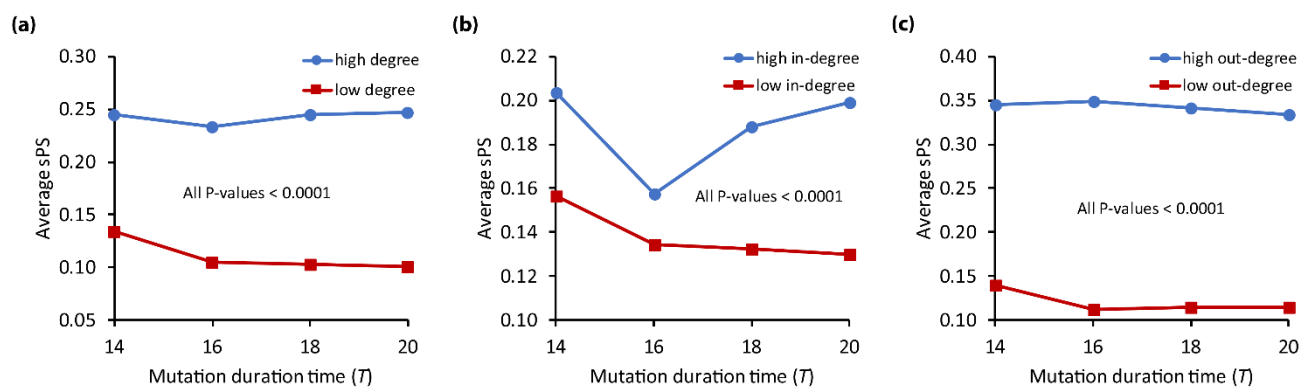

**Figure S2.** Relations of *sPS* and degree of nodes in KEGG network. All genes were classified into 'high/low degree/in-degree/out-degree' groups if any gene having high/low number of nodes' degree/in-degree/out-degree (blue/red lines). Y-axis means the average *sPS* for each group. Mutation duration time *T* was set from 14 to 20.

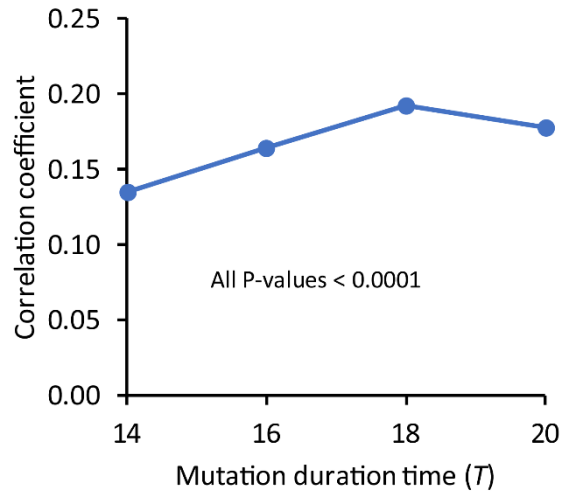

**Figure S3.** Relations of *sPS* values to feedback loops in KEGG network. All pairs of nodes were classified into 'FBL' and 'Non-FBL' groups such that any gene in the pair is involved with feedback loops or not. Y-axis values mean the correlation coefficient between *sPS* values and feedback loop. Mutation duration time was set to  $T=14-20$ .

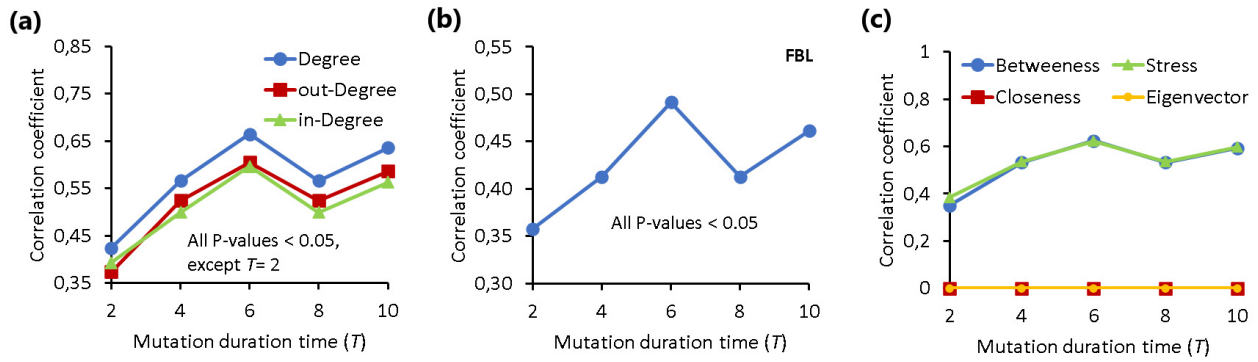

**Figure S4.** Relations of *sPS* value in random BA network.

A total of 250 BA random networks with  $|V| = 50$  and  $|A| = 100$  were generated. The time gap ( $T$ ) was set to 2-10. (a) Relations to the degree of nodes. Y-axis values mean correlation coefficients between *sPS* and the number of nodes' degree, in-degree, and out-degree. (b) Relations to the feedback loops. All genes were classified into 'FBL' and 'No FBL' where gene is involving feedback loops or not, respectively. Y-axis values mean the correlation coefficient between *sPS* values and feedback loop. (c) Relations to the centrality measures including betweenness, stress, closeness, and eigenvector. Y-axis values mean the correlation coefficients between *sPS* and each centrality measures.

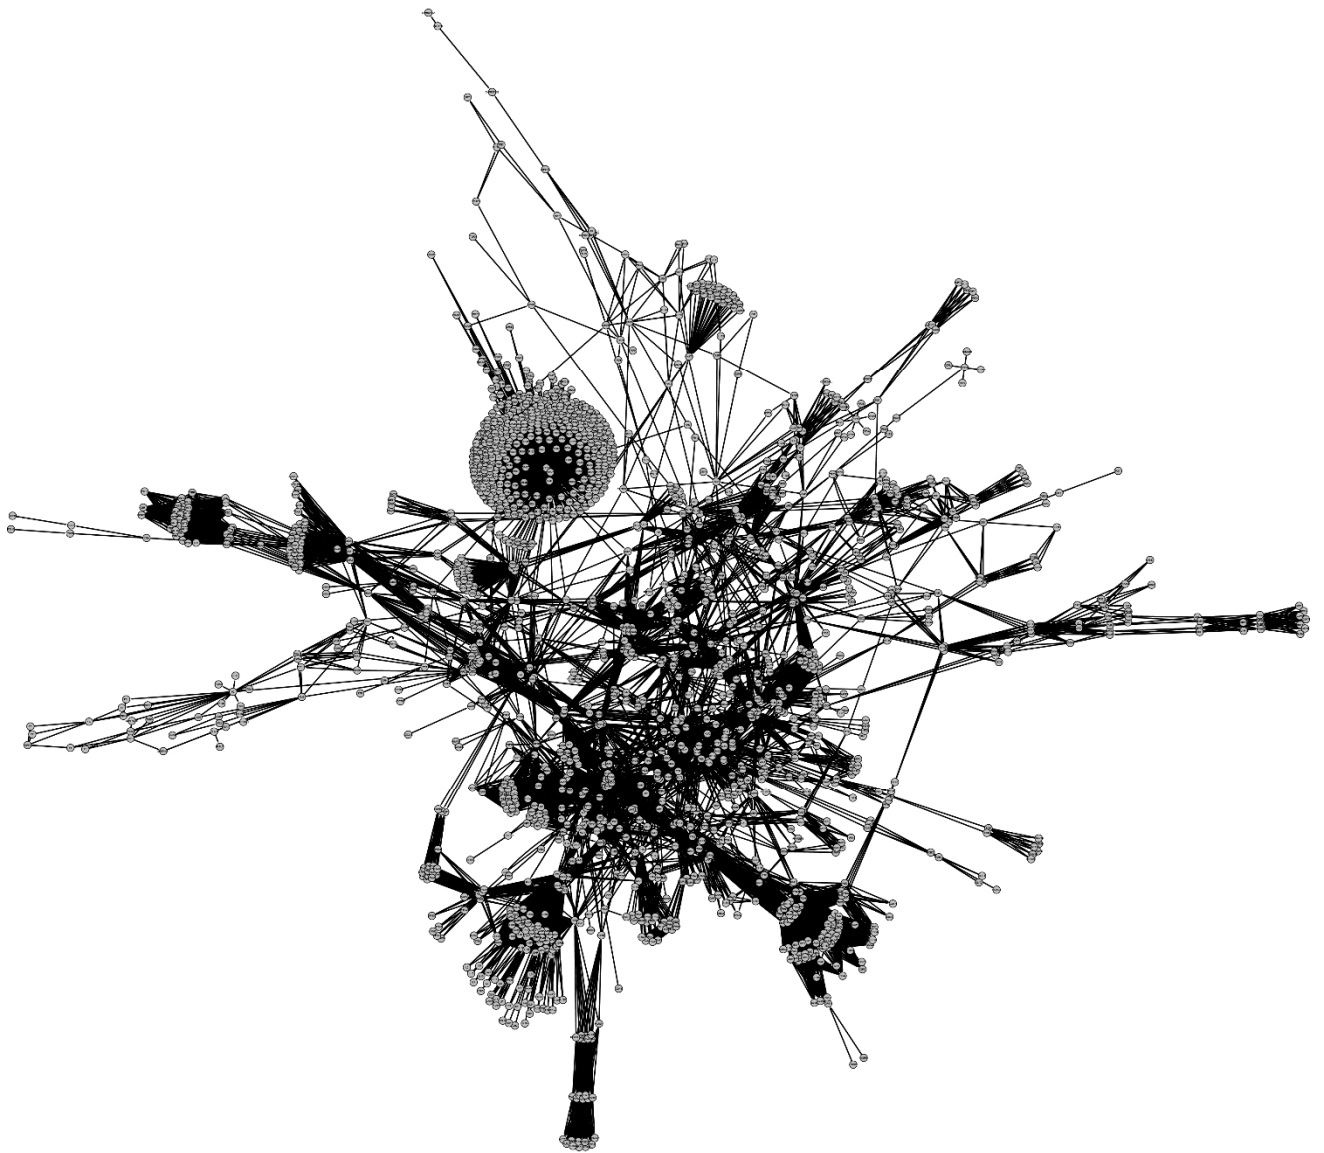

**Figure S5.** Original KEGG network with  $|V|=1659$ ,  $|A|=7964$ .

**Table S1.** KEGG network dataset consists of 1659 nodes and 7964 interactions.

| GenelD<br>(source) | Interaction | GenelD<br>(target) |
|--------------------|-------------|--------------------|
| 9655               | -1          | 7297               |
| 9655               | -1          | 3718               |
| 9655               | -1          | 3717               |
| 9655               | -1          | 3716               |
| 9655               | -1          | 9180               |
| 9655               | -1          | 64109              |
| 9655               | -1          | 58985              |
| 9655               | -1          | 5618               |
| 9655               | -1          | 53833              |
| 9655               | -1          | 53832              |
| 9655               | -1          | 50615              |
| 9655               | -1          | 4352               |
| 9655               | -1          | 3977               |
| 9655               | -1          | 3953               |
| 9655               | -1          | 3601               |
| 9655               | -1          | 3598               |
| 9655               | -1          | 3597               |
| 9655               | -1          | 3595               |
| 9655               | -1          | 3594               |
| 9655               | -1          | 3590               |
| 9655               | -1          | 3588               |
| 9655               | -1          | 3587               |
| 9655               | -1          | 3581               |
| 9655               | -1          | 3575               |
| 9655               | -1          | 3572               |
| 9655               | -1          | 3570               |
| 9655               | -1          | 3568               |
| 9655               | -1          | 3566               |
| 9655               | -1          | 3563               |
| 9655               | -1          | 3561               |
| 9655               | -1          | 3560               |
| 9655               | -1          | 3559               |
| 9655               | -1          | 3460               |
| 9655               | -1          | 3459               |
| 9655               | -1          | 3455               |
| 9655               | -1          | 3454               |
| 9655               | -1          | 2690               |
| 9655               | -1          | 2057               |
| 9655               | -1          | 163702             |
| 9655               | -1          | 149233             |
| 9655               | -1          | 1441               |
| 9655               | -1          | 1439               |
| 9655               | -1          | 1438               |
| 9655               | -1          | 1271               |
| 9655               | -1          | 116379             |
| 30837              | -1          | 7297               |
| 30837              | -1          | 3718               |
| 30837              | -1          | 3717               |
| 30837              | -1          | 3716               |
| 30837              | -1          | 9180               |
| 30837              | -1          | 64109              |

|       |    |        |
|-------|----|--------|
| 30837 | -1 | 58985  |
| 30837 | -1 | 5618   |
| 30837 | -1 | 53833  |
| 30837 | -1 | 53832  |
| 30837 | -1 | 50615  |
| 30837 | -1 | 4352   |
| 30837 | -1 | 3977   |
| 30837 | -1 | 3953   |
| 30837 | -1 | 3601   |
| 30837 | -1 | 3598   |
| 30837 | -1 | 3597   |
| 30837 | -1 | 3595   |
| 30837 | -1 | 3594   |
| 30837 | -1 | 3590   |
| 30837 | -1 | 3588   |
| 30837 | -1 | 3587   |
| 30837 | -1 | 3581   |
| 30837 | -1 | 3575   |
| 30837 | -1 | 3572   |
| 30837 | -1 | 3570   |
| 30837 | -1 | 3568   |
| 30837 | -1 | 3566   |
| 30837 | -1 | 3563   |
| 30837 | -1 | 3561   |
| 30837 | -1 | 3560   |
| 30837 | -1 | 3559   |
| 30837 | -1 | 3460   |
| 30837 | -1 | 3459   |
| 30837 | -1 | 3455   |
| 30837 | -1 | 3454   |
| 30837 | -1 | 2690   |
| 30837 | -1 | 2057   |
| 30837 | -1 | 163702 |
| 30837 | -1 | 149233 |
| 30837 | -1 | 1441   |
| 30837 | -1 | 1439   |
| 30837 | -1 | 1438   |
| 30837 | -1 | 1271   |
| 30837 | -1 | 116379 |
| 5571  | -1 | 32     |
| 5571  | -1 | 31     |
| 5565  | -1 | 32     |
| 5565  | -1 | 31     |
| 5564  | -1 | 32     |
| 5564  | -1 | 31     |
| 53632 | -1 | 32     |
| 53632 | -1 | 31     |
| 51422 | -1 | 32     |
| 51422 | -1 | 31     |
| 157   | -1 | 8590   |
| 157   | -1 | 8392   |
| 157   | -1 | 8390   |
| 157   | -1 | 8388   |
| 157   | -1 | 8387   |
| 157   | -1 | 8386   |

|     |    |        |
|-----|----|--------|
| 157 | -1 | 8385   |
| 157 | -1 | 8383   |
| 157 | -1 | 81797  |
| 157 | -1 | 81697  |
| 157 | -1 | 81696  |
| 157 | -1 | 81472  |
| 157 | -1 | 81470  |
| 157 | -1 | 81469  |
| 157 | -1 | 81448  |
| 157 | -1 | 81442  |
| 157 | -1 | 81399  |
| 157 | -1 | 81392  |
| 157 | -1 | 81328  |
| 157 | -1 | 81327  |
| 157 | -1 | 81318  |
| 157 | -1 | 81309  |
| 157 | -1 | 81300  |
| 157 | -1 | 81285  |
| 157 | -1 | 81282  |
| 157 | -1 | 81168  |
| 157 | -1 | 81127  |
| 157 | -1 | 81099  |
| 157 | -1 | 81061  |
| 157 | -1 | 81050  |
| 157 | -1 | 79544  |
| 157 | -1 | 79541  |
| 157 | -1 | 79501  |
| 157 | -1 | 79473  |
| 157 | -1 | 79345  |
| 157 | -1 | 79339  |
| 157 | -1 | 79324  |
| 157 | -1 | 7932   |
| 157 | -1 | 79317  |
| 157 | -1 | 79310  |
| 157 | -1 | 79295  |
| 157 | -1 | 79290  |
| 157 | -1 | 56656  |
| 157 | -1 | 504189 |
| 157 | -1 | 4995   |
| 157 | -1 | 4994   |
| 157 | -1 | 4993   |
| 157 | -1 | 4992   |
| 157 | -1 | 4991   |
| 157 | -1 | 442361 |
| 157 | -1 | 442194 |
| 157 | -1 | 442191 |
| 157 | -1 | 442186 |
| 157 | -1 | 441933 |
| 157 | -1 | 441911 |
| 157 | -1 | 441670 |
| 157 | -1 | 441669 |
| 157 | -1 | 441639 |
| 157 | -1 | 441608 |
| 157 | -1 | 402317 |
| 157 | -1 | 402135 |

|     |    |        |
|-----|----|--------|
| 157 | -1 | 401994 |
| 157 | -1 | 401993 |
| 157 | -1 | 401992 |
| 157 | -1 | 401667 |
| 157 | -1 | 401666 |
| 157 | -1 | 401665 |
| 157 | -1 | 401427 |
| 157 | -1 | 393046 |
| 157 | -1 | 392392 |
| 157 | -1 | 392391 |
| 157 | -1 | 392390 |
| 157 | -1 | 392376 |
| 157 | -1 | 392309 |
| 157 | -1 | 392138 |
| 157 | -1 | 391211 |
| 157 | -1 | 391196 |
| 157 | -1 | 391195 |
| 157 | -1 | 391194 |
| 157 | -1 | 391192 |
| 157 | -1 | 391191 |
| 157 | -1 | 391190 |
| 157 | -1 | 391189 |
| 157 | -1 | 391114 |
| 157 | -1 | 391112 |
| 157 | -1 | 391109 |
| 157 | -1 | 391107 |
| 157 | -1 | 390892 |
| 157 | -1 | 390883 |
| 157 | -1 | 390882 |
| 157 | -1 | 390649 |
| 157 | -1 | 390648 |
| 157 | -1 | 390538 |
| 157 | -1 | 390445 |
| 157 | -1 | 390442 |
| 157 | -1 | 390439 |
| 157 | -1 | 390437 |
| 157 | -1 | 390436 |
| 157 | -1 | 390433 |
| 157 | -1 | 390431 |
| 157 | -1 | 390429 |
| 157 | -1 | 390327 |
| 157 | -1 | 390326 |
| 157 | -1 | 390323 |
| 157 | -1 | 390321 |
| 157 | -1 | 390275 |
| 157 | -1 | 390265 |
| 157 | -1 | 390264 |
| 157 | -1 | 390261 |
| 157 | -1 | 390260 |
| 157 | -1 | 390201 |
| 157 | -1 | 390199 |
| 157 | -1 | 390197 |
| 157 | -1 | 390195 |
| 157 | -1 | 390191 |
| 157 | -1 | 390181 |

|     |    |        |
|-----|----|--------|
| 157 | -1 | 390174 |
| 157 | -1 | 390168 |
| 157 | -1 | 390167 |
| 157 | -1 | 390162 |
| 157 | -1 | 390157 |
| 157 | -1 | 390155 |
| 157 | -1 | 390154 |
| 157 | -1 | 390152 |
| 157 | -1 | 390151 |
| 157 | -1 | 390144 |
| 157 | -1 | 390142 |
| 157 | -1 | 390113 |
| 157 | -1 | 390093 |
| 157 | -1 | 390084 |
| 157 | -1 | 390083 |
| 157 | -1 | 390081 |
| 157 | -1 | 390079 |
| 157 | -1 | 390078 |
| 157 | -1 | 390077 |
| 157 | -1 | 390075 |
| 157 | -1 | 390072 |
| 157 | -1 | 390067 |
| 157 | -1 | 390066 |
| 157 | -1 | 390064 |
| 157 | -1 | 390063 |
| 157 | -1 | 390061 |
| 157 | -1 | 390059 |
| 157 | -1 | 390058 |
| 157 | -1 | 390054 |
| 157 | -1 | 390038 |
| 157 | -1 | 390037 |
| 157 | -1 | 390036 |
| 157 | -1 | 389090 |
| 157 | -1 | 387748 |
| 157 | -1 | 347468 |
| 157 | -1 | 347169 |
| 157 | -1 | 347168 |
| 157 | -1 | 346528 |
| 157 | -1 | 346525 |
| 157 | -1 | 346517 |
| 157 | -1 | 343563 |
| 157 | -1 | 343406 |
| 157 | -1 | 343173 |
| 157 | -1 | 343172 |
| 157 | -1 | 343171 |
| 157 | -1 | 343169 |
| 157 | -1 | 341799 |
| 157 | -1 | 341568 |
| 157 | -1 | 341418 |
| 157 | -1 | 341416 |
| 157 | -1 | 341276 |
| 157 | -1 | 341152 |
| 157 | -1 | 340980 |
| 157 | -1 | 338755 |
| 157 | -1 | 338751 |

|     |    |        |
|-----|----|--------|
| 157 | -1 | 338675 |
| 157 | -1 | 338674 |
| 157 | -1 | 338662 |
| 157 | -1 | 286365 |
| 157 | -1 | 286362 |
| 157 | -1 | 285659 |
| 157 | -1 | 284532 |
| 157 | -1 | 284521 |
| 157 | -1 | 284433 |
| 157 | -1 | 284383 |
| 157 | -1 | 283694 |
| 157 | -1 | 283365 |
| 157 | -1 | 283297 |
| 157 | -1 | 283189 |
| 157 | -1 | 283162 |
| 157 | -1 | 283160 |
| 157 | -1 | 283159 |
| 157 | -1 | 283111 |
| 157 | -1 | 283093 |
| 157 | -1 | 283092 |
| 157 | -1 | 282775 |
| 157 | -1 | 282770 |
| 157 | -1 | 282763 |
| 157 | -1 | 26740  |
| 157 | -1 | 26737  |
| 157 | -1 | 26735  |
| 157 | -1 | 26716  |
| 157 | -1 | 26707  |
| 157 | -1 | 26696  |
| 157 | -1 | 26692  |
| 157 | -1 | 26689  |
| 157 | -1 | 26686  |
| 157 | -1 | 26683  |
| 157 | -1 | 26682  |
| 157 | -1 | 26664  |
| 157 | -1 | 26659  |
| 157 | -1 | 26658  |
| 157 | -1 | 26539  |
| 157 | -1 | 26538  |
| 157 | -1 | 26534  |
| 157 | -1 | 26533  |
| 157 | -1 | 26532  |
| 157 | -1 | 26531  |
| 157 | -1 | 26529  |
| 157 | -1 | 26496  |
| 157 | -1 | 26494  |
| 157 | -1 | 26493  |
| 157 | -1 | 26492  |
| 157 | -1 | 26476  |
| 157 | -1 | 26339  |
| 157 | -1 | 26338  |
| 157 | -1 | 26333  |
| 157 | -1 | 26248  |
| 157 | -1 | 26246  |
| 157 | -1 | 26245  |

|     |    |        |
|-----|----|--------|
| 157 | -1 | 26219  |
| 157 | -1 | 26212  |
| 157 | -1 | 26211  |
| 157 | -1 | 26189  |
| 157 | -1 | 26188  |
| 157 | -1 | 256892 |
| 157 | -1 | 256148 |
| 157 | -1 | 256144 |
| 157 | -1 | 255725 |
| 157 | -1 | 254973 |
| 157 | -1 | 254879 |
| 157 | -1 | 254786 |
| 157 | -1 | 254783 |
| 157 | -1 | 23538  |
| 157 | -1 | 219986 |
| 157 | -1 | 219983 |
| 157 | -1 | 219982 |
| 157 | -1 | 219981 |
| 157 | -1 | 219968 |
| 157 | -1 | 219965 |
| 157 | -1 | 219960 |
| 157 | -1 | 219959 |
| 157 | -1 | 219958 |
| 157 | -1 | 219957 |
| 157 | -1 | 219956 |
| 157 | -1 | 219954 |
| 157 | -1 | 219952 |
| 157 | -1 | 219875 |
| 157 | -1 | 219874 |
| 157 | -1 | 219873 |
| 157 | -1 | 219870 |
| 157 | -1 | 219869 |
| 157 | -1 | 219865 |
| 157 | -1 | 219858 |
| 157 | -1 | 219493 |
| 157 | -1 | 219487 |
| 157 | -1 | 219484 |
| 157 | -1 | 219482 |
| 157 | -1 | 219479 |
| 157 | -1 | 219477 |
| 157 | -1 | 219473 |
| 157 | -1 | 219469 |
| 157 | -1 | 219464 |
| 157 | -1 | 219453 |
| 157 | -1 | 219447 |
| 157 | -1 | 219438 |
| 157 | -1 | 219437 |
| 157 | -1 | 219436 |
| 157 | -1 | 219432 |
| 157 | -1 | 219431 |
| 157 | -1 | 219429 |
| 157 | -1 | 219428 |
| 157 | -1 | 219417 |
| 157 | -1 | 196335 |
| 157 | -1 | 162998 |

|     |     |        |
|-----|-----|--------|
| 157 | -1  | 158131 |
| 157 | -1  | 150681 |
| 157 | -1  | 144125 |
| 157 | -1  | 144124 |
| 157 | -1  | 143503 |
| 157 | -1  | 143502 |
| 157 | -1  | 143496 |
| 157 | -1  | 138883 |
| 157 | -1  | 138882 |
| 157 | -1  | 138881 |
| 157 | -1  | 138805 |
| 157 | -1  | 138804 |
| 157 | -1  | 138803 |
| 157 | -1  | 138802 |
| 157 | -1  | 138799 |
| 157 | -1  | 135948 |
| 157 | -1  | 135946 |
| 157 | -1  | 135941 |
| 157 | -1  | 135924 |
| 157 | -1  | 134083 |
| 157 | -1  | 130075 |
| 157 | -1  | 128372 |
| 157 | -1  | 128371 |
| 157 | -1  | 128368 |
| 157 | -1  | 128367 |
| 157 | -1  | 128360 |
| 157 | -1  | 127623 |
| 157 | □ a | 127385 |
| 157 | -1  | 127077 |
| 157 | -1  | 127074 |
| 157 | -1  | 127069 |
| 157 | -1  | 127068 |
| 157 | -1  | 127066 |
| 157 | -1  | 127064 |
| 157 | -1  | 127062 |
| 157 | -1  | 127059 |
| 157 | -1  | 126541 |
| 157 | -1  | 126370 |
| 157 | -1  | 125963 |
| 157 | -1  | 125962 |
| 157 | -1  | 125958 |
| 157 | -1  | 124538 |
| 157 | -1  | 122748 |
| 157 | -1  | 122742 |
| 157 | -1  | 122740 |
| 157 | -1  | 121364 |
| 157 | -1  | 121275 |
| 157 | -1  | 121130 |
| 157 | -1  | 120796 |
| 157 | -1  | 120793 |
| 157 | -1  | 120787 |
| 157 | -1  | 120776 |
| 157 | -1  | 120775 |
| 157 | -1  | 120586 |
| 157 | -1  | 120066 |

|        |    |        |
|--------|----|--------|
| 157    | -1 | 120065 |
| 157    | -1 | 119774 |
| 157    | -1 | 119772 |
| 157    | -1 | 119765 |
| 157    | -1 | 119764 |
| 157    | -1 | 119749 |
| 157    | -1 | 119695 |
| 157    | -1 | 119694 |
| 157    | -1 | 119692 |
| 157    | -1 | 119687 |
| 157    | -1 | 119682 |
| 157    | -1 | 119679 |
| 157    | -1 | 119678 |
| 157    | -1 | 10798  |
| 5598   | -1 | 57369  |
| 5598   | -1 | 2697   |
| 53944  | -1 | 2737   |
| 53944  | -1 | 2736   |
| 53944  | -1 | 2735   |
| 1456   | -1 | 2737   |
| 1456   | -1 | 2736   |
| 1456   | -1 | 2735   |
| 1455   | -1 | 2737   |
| 1455   | -1 | 2736   |
| 1455   | -1 | 2735   |
| 1452   | -1 | 2737   |
| 1452   | -1 | 2736   |
| 1452   | -1 | 2735   |
| 122011 | -1 | 2737   |
| 122011 | -1 | 2736   |
| 122011 | -1 | 2735   |
| 51701  | -1 | 83439  |
| 51701  | -1 | 6934   |
| 51701  | -1 | 6932   |
| 51701  | -1 | 51176  |
| 6197   | -1 | 7249   |
| 6196   | -1 | 7249   |
| 6195   | -1 | 7249   |
| 27330  | -1 | 7249   |
| 5563   | -1 | 32     |
| 5563   | -1 | 31     |
| 5563   | -1 | 2475   |
| 5562   | -1 | 32     |
| 5562   | -1 | 31     |
| 5562   | -1 | 2475   |
| 5347   | -1 | 9088   |
| 9088   | -1 | 983    |
| 7465   | -1 | 983    |
| 55844  | -1 | 5590   |
| 55844  | -1 | 5584   |
| 5522   | -1 | 5590   |
| 5522   | -1 | 5584   |
| 5521   | -1 | 5590   |
| 5521   | -1 | 5584   |
| 5520   | -1 | 5590   |

|       |    |        |
|-------|----|--------|
| 5520  | -1 | 5584   |
| 5495  | -1 | 6885   |
| 5536  | -1 | 4217   |
| 5494  | -1 | 6416   |
| 5494  | -1 | 5609   |
| 5494  | -1 | 5608   |
| 5494  | -1 | 650832 |
| 5494  | -1 | 5606   |
| 80824 | -1 | 6300   |
| 80824 | -1 | 5603   |
| 80824 | -1 | 5600   |
| 80824 | -1 | 1432   |
| 80824 | -1 | 5602   |
| 80824 | -1 | 5601   |
| 80824 | -1 | 5599   |
| 80824 | -1 | 5595   |
| 80824 | -1 | 5594   |
| 1852  | -1 | 6300   |
| 1852  | -1 | 5603   |
| 1852  | -1 | 5600   |
| 1852  | -1 | 1432   |
| 1852  | -1 | 5602   |
| 1852  | -1 | 5601   |
| 1852  | -1 | 5599   |
| 1852  | -1 | 5595   |
| 1852  | -1 | 5594   |
| 1850  | -1 | 6300   |
| 1850  | -1 | 5603   |
| 1850  | -1 | 5600   |
| 1850  | -1 | 1432   |
| 1850  | -1 | 5602   |
| 1850  | -1 | 5601   |
| 1850  | -1 | 5599   |
| 1850  | -1 | 5595   |
| 1850  | -1 | 5594   |
| 1849  | -1 | 6300   |
| 1849  | -1 | 5603   |
| 1849  | -1 | 5600   |
| 1849  | -1 | 1432   |
| 1849  | -1 | 5602   |
| 1849  | -1 | 5601   |
| 1849  | -1 | 5599   |
| 1849  | -1 | 5595   |
| 1849  | -1 | 5594   |
| 1848  | -1 | 6300   |
| 1848  | -1 | 5603   |
| 1848  | -1 | 5600   |
| 1848  | -1 | 1432   |
| 1848  | -1 | 5602   |
| 1848  | -1 | 5601   |
| 1848  | -1 | 5599   |
| 1848  | -1 | 5595   |
| 1848  | -1 | 5594   |
| 1847  | -1 | 6300   |
| 1847  | -1 | 5603   |

|       |    |      |
|-------|----|------|
| 1847  | -1 | 5600 |
| 1847  | -1 | 1432 |
| 1847  | -1 | 5602 |
| 1847  | -1 | 5601 |
| 1847  | -1 | 5599 |
| 1847  | -1 | 5595 |
| 1847  | -1 | 5594 |
| 1846  | -1 | 6300 |
| 1846  | -1 | 5603 |
| 1846  | -1 | 5600 |
| 1846  | -1 | 1432 |
| 1846  | -1 | 5602 |
| 1846  | -1 | 5601 |
| 1846  | -1 | 5599 |
| 1846  | -1 | 5595 |
| 1846  | -1 | 5594 |
| 1845  | -1 | 6300 |
| 1845  | -1 | 5603 |
| 1845  | -1 | 5600 |
| 1845  | -1 | 1432 |
| 1845  | -1 | 5602 |
| 1845  | -1 | 5601 |
| 1845  | -1 | 5599 |
| 1845  | -1 | 5595 |
| 1845  | -1 | 5594 |
| 1844  | -1 | 6300 |
| 1844  | -1 | 5603 |
| 1844  | -1 | 5600 |
| 1844  | -1 | 1432 |
| 1844  | -1 | 5602 |
| 1844  | -1 | 5601 |
| 1844  | -1 | 5599 |
| 1844  | -1 | 5595 |
| 1844  | -1 | 5594 |
| 1843  | -1 | 6300 |
| 1843  | -1 | 5603 |
| 1843  | -1 | 5600 |
| 1843  | -1 | 1432 |
| 1843  | -1 | 5602 |
| 1843  | -1 | 5601 |
| 1843  | -1 | 5599 |
| 1843  | -1 | 5595 |
| 1843  | -1 | 5594 |
| 11221 | -1 | 6300 |
| 11221 | -1 | 5603 |
| 11221 | -1 | 5600 |
| 11221 | -1 | 1432 |
| 11221 | -1 | 5602 |
| 11221 | -1 | 5601 |
| 11221 | -1 | 5599 |
| 11221 | -1 | 5595 |
| 11221 | -1 | 5594 |
| 11072 | -1 | 6300 |
| 11072 | -1 | 5603 |
| 11072 | -1 | 5600 |

|        |    |       |
|--------|----|-------|
| 11072  | -1 | 1432  |
| 11072  | -1 | 5602  |
| 11072  | -1 | 5601  |
| 11072  | -1 | 5599  |
| 11072  | -1 | 5595  |
| 11072  | -1 | 5594  |
| 84867  | -1 | 6300  |
| 84867  | -1 | 5603  |
| 84867  | -1 | 5600  |
| 84867  | -1 | 1432  |
| 84867  | -1 | 5602  |
| 84867  | -1 | 5601  |
| 84867  | -1 | 5599  |
| 84867  | -1 | 5595  |
| 84867  | -1 | 5594  |
| 5801   | -1 | 6300  |
| 5801   | -1 | 5603  |
| 5801   | -1 | 5600  |
| 5801   | -1 | 1432  |
| 5801   | -1 | 5602  |
| 5801   | -1 | 5601  |
| 5801   | -1 | 5599  |
| 5801   | -1 | 5595  |
| 5801   | -1 | 5594  |
| 5778   | -1 | 6300  |
| 5778   | -1 | 5603  |
| 5778   | -1 | 5600  |
| 5778   | -1 | 1432  |
| 5778   | -1 | 5602  |
| 5778   | -1 | 5601  |
| 5778   | -1 | 5599  |
| 5778   | -1 | 5595  |
| 5778   | -1 | 5594  |
| 9586   | -1 | 2033  |
| 9586   | -1 | 1387  |
| 4149   | -1 | 9063  |
| 4149   | -1 | 8554  |
| 4149   | -1 | 51588 |
| 4149   | -1 | 10401 |
| 862    | -1 | 1050  |
| 862    | -1 | 6688  |
| 652671 | -1 | 6688  |
| 652346 | -1 | 6688  |
| 5914   | -1 | 6688  |
| 5371   | -1 | 6688  |
| 6647   | -1 | 4747  |
| 6647   | -1 | 79139 |
| 6647   | -1 | 84134 |
| 6647   | -1 | 10452 |
| 6647   | -1 | 596   |
| 8835   | -1 | 7297  |
| 8835   | -1 | 3718  |
| 8835   | -1 | 3717  |
| 8835   | -1 | 3716  |
| 8835   | -1 | 9180  |

|      |    |        |
|------|----|--------|
| 8835 | -1 | 64109  |
| 8835 | -1 | 58985  |
| 8835 | -1 | 5618   |
| 8835 | -1 | 53833  |
| 8835 | -1 | 53832  |
| 8835 | -1 | 50615  |
| 8835 | -1 | 4352   |
| 8835 | -1 | 3977   |
| 8835 | -1 | 3953   |
| 8835 | -1 | 3601   |
| 8835 | -1 | 3598   |
| 8835 | -1 | 3597   |
| 8835 | -1 | 3595   |
| 8835 | -1 | 3594   |
| 8835 | -1 | 3590   |
| 8835 | -1 | 3588   |
| 8835 | -1 | 3587   |
| 8835 | -1 | 3581   |
| 8835 | -1 | 3575   |
| 8835 | -1 | 3572   |
| 8835 | -1 | 3570   |
| 8835 | -1 | 3568   |
| 8835 | -1 | 3566   |
| 8835 | -1 | 3563   |
| 8835 | -1 | 3561   |
| 8835 | -1 | 3560   |
| 8835 | -1 | 3559   |
| 8835 | -1 | 3460   |
| 8835 | -1 | 3459   |
| 8835 | -1 | 3455   |
| 8835 | -1 | 3454   |
| 8835 | -1 | 2690   |
| 8835 | -1 | 2057   |
| 8835 | -1 | 163702 |
| 8835 | -1 | 149233 |
| 8835 | -1 | 1441   |
| 8835 | -1 | 1439   |
| 8835 | -1 | 1438   |
| 8835 | -1 | 1271   |
| 8835 | -1 | 116379 |
| 8835 | -1 | 3643   |
| 8835 | -1 | 8660   |
| 8835 | -1 | 8471   |
| 8835 | -1 | 3667   |
| 8651 | -1 | 7297   |
| 8651 | -1 | 3718   |
| 8651 | -1 | 3717   |
| 8651 | -1 | 3716   |
| 8651 | -1 | 9180   |
| 8651 | -1 | 64109  |
| 8651 | -1 | 58985  |
| 8651 | -1 | 5618   |
| 8651 | -1 | 53833  |
| 8651 | -1 | 53832  |
| 8651 | -1 | 50615  |

|        |    |        |
|--------|----|--------|
| 8651   | -1 | 4352   |
| 8651   | -1 | 3977   |
| 8651   | -1 | 3953   |
| 8651   | -1 | 3601   |
| 8651   | -1 | 3598   |
| 8651   | -1 | 3597   |
| 8651   | -1 | 3595   |
| 8651   | -1 | 3594   |
| 8651   | -1 | 3590   |
| 8651   | -1 | 3588   |
| 8651   | -1 | 3587   |
| 8651   | -1 | 3581   |
| 8651   | -1 | 3575   |
| 8651   | -1 | 3572   |
| 8651   | -1 | 3570   |
| 8651   | -1 | 3568   |
| 8651   | -1 | 3566   |
| 8651   | -1 | 3563   |
| 8651   | -1 | 3561   |
| 8651   | -1 | 3560   |
| 8651   | -1 | 3559   |
| 8651   | -1 | 3460   |
| 8651   | -1 | 3459   |
| 8651   | -1 | 3455   |
| 8651   | -1 | 3454   |
| 8651   | -1 | 2690   |
| 8651   | -1 | 2057   |
| 8651   | -1 | 163702 |
| 8651   | -1 | 149233 |
| 8651   | -1 | 1441   |
| 8651   | -1 | 1439   |
| 8651   | -1 | 1438   |
| 8651   | -1 | 1271   |
| 8651   | -1 | 116379 |
| 8651   | -1 | 3643   |
| 8651   | -1 | 8660   |
| 8651   | -1 | 8471   |
| 8651   | -1 | 3667   |
| 122809 | -1 | 7297   |
| 122809 | -1 | 3718   |
| 122809 | -1 | 3717   |
| 122809 | -1 | 3716   |
| 122809 | -1 | 9180   |
| 122809 | -1 | 64109  |
| 122809 | -1 | 58985  |
| 122809 | -1 | 5618   |
| 122809 | -1 | 53833  |
| 122809 | -1 | 53832  |
| 122809 | -1 | 50615  |
| 122809 | -1 | 4352   |
| 122809 | -1 | 3977   |
| 122809 | -1 | 3953   |
| 122809 | -1 | 3601   |
| 122809 | -1 | 3598   |
| 122809 | -1 | 3597   |

|        |    |        |
|--------|----|--------|
| 122809 | -1 | 3595   |
| 122809 | -1 | 3594   |
| 122809 | -1 | 3590   |
| 122809 | -1 | 3588   |
| 122809 | -1 | 3587   |
| 122809 | -1 | 3581   |
| 122809 | -1 | 3575   |
| 122809 | -1 | 3572   |
| 122809 | -1 | 3570   |
| 122809 | -1 | 3568   |
| 122809 | -1 | 3566   |
| 122809 | -1 | 3563   |
| 122809 | -1 | 3561   |
| 122809 | -1 | 3560   |
| 122809 | -1 | 3559   |
| 122809 | -1 | 3460   |
| 122809 | -1 | 3459   |
| 122809 | -1 | 3455   |
| 122809 | -1 | 3454   |
| 122809 | -1 | 2690   |
| 122809 | -1 | 2057   |
| 122809 | -1 | 163702 |
| 122809 | -1 | 149233 |
| 122809 | -1 | 1441   |
| 122809 | -1 | 1439   |
| 122809 | -1 | 1438   |
| 122809 | -1 | 1271   |
| 122809 | -1 | 116379 |
| 122809 | -1 | 3643   |
| 122809 | -1 | 8660   |
| 122809 | -1 | 8471   |
| 122809 | -1 | 3667   |
| 9021   | -1 | 7297   |
| 9021   | -1 | 3718   |
| 9021   | -1 | 3717   |
| 9021   | -1 | 3716   |
| 9021   | -1 | 9180   |
| 9021   | -1 | 64109  |
| 9021   | -1 | 58985  |
| 9021   | -1 | 5618   |
| 9021   | -1 | 53833  |
| 9021   | -1 | 53832  |
| 9021   | -1 | 50615  |
| 9021   | -1 | 4352   |
| 9021   | -1 | 3977   |
| 9021   | -1 | 3953   |
| 9021   | -1 | 3601   |
| 9021   | -1 | 3598   |
| 9021   | -1 | 3597   |
| 9021   | -1 | 3595   |
| 9021   | -1 | 3594   |
| 9021   | -1 | 3590   |
| 9021   | -1 | 3588   |
| 9021   | -1 | 3587   |
| 9021   | -1 | 3581   |

|        |    |        |
|--------|----|--------|
| 9021   | -1 | 3575   |
| 9021   | -1 | 3572   |
| 9021   | -1 | 3570   |
| 9021   | -1 | 3568   |
| 9021   | -1 | 3566   |
| 9021   | -1 | 3563   |
| 9021   | -1 | 3561   |
| 9021   | -1 | 3560   |
| 9021   | -1 | 3559   |
| 9021   | -1 | 3460   |
| 9021   | -1 | 3459   |
| 9021   | -1 | 3455   |
| 9021   | -1 | 3454   |
| 9021   | -1 | 2690   |
| 9021   | -1 | 2057   |
| 9021   | -1 | 163702 |
| 9021   | -1 | 149233 |
| 9021   | -1 | 1441   |
| 9021   | -1 | 1439   |
| 9021   | -1 | 1438   |
| 9021   | -1 | 1271   |
| 9021   | -1 | 116379 |
| 9021   | -1 | 3643   |
| 9021   | -1 | 8660   |
| 9021   | -1 | 8471   |
| 9021   | -1 | 3667   |
| 434    | -1 | 4157   |
| 7248   | -1 | 6009   |
| 26999  | -1 | 55845  |
| 26999  | -1 | 8936   |
| 23191  | -1 | 55845  |
| 23191  | -1 | 8936   |
| 3071   | -1 | 55845  |
| 3071   | -1 | 8936   |
| 10787  | -1 | 55845  |
| 10787  | -1 | 8936   |
| 10152  | -1 | 55845  |
| 10152  | -1 | 8936   |
| 8396   | -1 | 85477  |
| 8396   | -1 | 2934   |
| 8395   | -1 | 85477  |
| 8395   | -1 | 2934   |
| 8394   | -1 | 85477  |
| 8394   | -1 | 2934   |
| 79837  | -1 | 85477  |
| 79837  | -1 | 2934   |
| 5305   | -1 | 85477  |
| 5305   | -1 | 2934   |
| 200576 | -1 | 85477  |
| 200576 | -1 | 2934   |
| 409    | -1 | 8590   |
| 409    | -1 | 8392   |
| 409    | -1 | 8390   |
| 409    | -1 | 8388   |
| 409    | -1 | 8387   |

|     |    |        |
|-----|----|--------|
| 409 | -1 | 8386   |
| 409 | -1 | 8385   |
| 409 | -1 | 8383   |
| 409 | -1 | 81797  |
| 409 | -1 | 81697  |
| 409 | -1 | 81696  |
| 409 | -1 | 81472  |
| 409 | -1 | 81470  |
| 409 | -1 | 81469  |
| 409 | -1 | 81448  |
| 409 | -1 | 81442  |
| 409 | -1 | 81399  |
| 409 | -1 | 81392  |
| 409 | -1 | 81328  |
| 409 | -1 | 81327  |
| 409 | -1 | 81318  |
| 409 | -1 | 81309  |
| 409 | -1 | 81300  |
| 409 | -1 | 81285  |
| 409 | -1 | 81282  |
| 409 | -1 | 81168  |
| 409 | -1 | 81127  |
| 409 | -1 | 81099  |
| 409 | -1 | 81061  |
| 409 | -1 | 81050  |
| 409 | -1 | 79544  |
| 409 | -1 | 79541  |
| 409 | -1 | 79501  |
| 409 | -1 | 79473  |
| 409 | -1 | 79345  |
| 409 | -1 | 79339  |
| 409 | -1 | 79324  |
| 409 | -1 | 7932   |
| 409 | -1 | 79317  |
| 409 | -1 | 79310  |
| 409 | -1 | 79295  |
| 409 | -1 | 79290  |
| 409 | -1 | 56656  |
| 409 | -1 | 504189 |
| 409 | -1 | 4995   |
| 409 | -1 | 4994   |
| 409 | -1 | 4993   |
| 409 | -1 | 4992   |
| 409 | -1 | 4991   |
| 409 | -1 | 442361 |
| 409 | -1 | 442194 |
| 409 | -1 | 442191 |
| 409 | -1 | 442186 |
| 409 | -1 | 441933 |
| 409 | -1 | 441911 |
| 409 | -1 | 441670 |
| 409 | -1 | 441669 |
| 409 | -1 | 441639 |
| 409 | -1 | 441608 |
| 409 | -1 | 402317 |

|     |    |        |
|-----|----|--------|
| 409 | -1 | 402135 |
| 409 | -1 | 401994 |
| 409 | -1 | 401993 |
| 409 | -1 | 401992 |
| 409 | -1 | 401667 |
| 409 | -1 | 401666 |
| 409 | -1 | 401665 |
| 409 | -1 | 401427 |
| 409 | -1 | 393046 |
| 409 | -1 | 392392 |
| 409 | -1 | 392391 |
| 409 | -1 | 392390 |
| 409 | -1 | 392376 |
| 409 | -1 | 392309 |
| 409 | -1 | 392138 |
| 409 | -1 | 391211 |
| 409 | -1 | 391196 |
| 409 | -1 | 391195 |
| 409 | -1 | 391194 |
| 409 | -1 | 391192 |
| 409 | -1 | 391191 |
| 409 | -1 | 391190 |
| 409 | -1 | 391189 |
| 409 | -1 | 391114 |
| 409 | -1 | 391112 |
| 409 | -1 | 391109 |
| 409 | -1 | 391107 |
| 409 | -1 | 390892 |
| 409 | -1 | 390883 |
| 409 | -1 | 390882 |
| 409 | -1 | 390649 |
| 409 | -1 | 390648 |
| 409 | -1 | 390538 |
| 409 | -1 | 390445 |
| 409 | -1 | 390442 |
| 409 | -1 | 390439 |
| 409 | -1 | 390437 |
| 409 | -1 | 390436 |
| 409 | -1 | 390433 |
| 409 | -1 | 390431 |
| 409 | -1 | 390429 |
| 409 | -1 | 390327 |
| 409 | -1 | 390326 |
| 409 | -1 | 390323 |
| 409 | -1 | 390321 |
| 409 | -1 | 390275 |
| 409 | -1 | 390265 |
| 409 | -1 | 390264 |
| 409 | -1 | 390261 |
| 409 | -1 | 390260 |
| 409 | -1 | 390201 |
| 409 | -1 | 390199 |
| 409 | -1 | 390197 |
| 409 | -1 | 390195 |
| 409 | -1 | 390191 |

|     |    |        |
|-----|----|--------|
| 409 | -1 | 390181 |
| 409 | -1 | 390174 |
| 409 | -1 | 390168 |
| 409 | -1 | 390167 |
| 409 | -1 | 390162 |
| 409 | -1 | 390157 |
| 409 | -1 | 390155 |
| 409 | -1 | 390154 |
| 409 | -1 | 390152 |
| 409 | -1 | 390151 |
| 409 | -1 | 390144 |
| 409 | -1 | 390142 |
| 409 | -1 | 390113 |
| 409 | -1 | 390093 |
| 409 | -1 | 390084 |
| 409 | -1 | 390083 |
| 409 | -1 | 390081 |
| 409 | -1 | 390079 |
| 409 | -1 | 390078 |
| 409 | -1 | 390077 |
| 409 | -1 | 390075 |
| 409 | -1 | 390072 |
| 409 | -1 | 390067 |
| 409 | -1 | 390066 |
| 409 | -1 | 390064 |
| 409 | -1 | 390063 |
| 409 | -1 | 390061 |
| 409 | -1 | 390059 |
| 409 | -1 | 390058 |
| 409 | -1 | 390054 |
| 409 | -1 | 390038 |
| 409 | -1 | 390037 |
| 409 | -1 | 390036 |
| 409 | -1 | 389090 |
| 409 | -1 | 387748 |
| 409 | -1 | 347468 |
| 409 | -1 | 347169 |
| 409 | -1 | 347168 |
| 409 | -1 | 346528 |
| 409 | -1 | 346525 |
| 409 | -1 | 346517 |
| 409 | -1 | 343563 |
| 409 | -1 | 343406 |
| 409 | -1 | 343173 |
| 409 | -1 | 343172 |
| 409 | -1 | 343171 |
| 409 | -1 | 343169 |
| 409 | -1 | 341799 |
| 409 | -1 | 341568 |
| 409 | -1 | 341418 |
| 409 | -1 | 341416 |
| 409 | -1 | 341276 |
| 409 | -1 | 341152 |
| 409 | -1 | 340980 |
| 409 | -1 | 338755 |

|     |    |        |
|-----|----|--------|
| 409 | -1 | 338751 |
| 409 | -1 | 338675 |
| 409 | -1 | 338674 |
| 409 | -1 | 338662 |
| 409 | -1 | 286365 |
| 409 | -1 | 286362 |
| 409 | -1 | 285659 |
| 409 | -1 | 284532 |
| 409 | -1 | 284521 |
| 409 | -1 | 284433 |
| 409 | -1 | 284383 |
| 409 | -1 | 283694 |
| 409 | -1 | 283365 |
| 409 | -1 | 283297 |
| 409 | -1 | 283189 |
| 409 | -1 | 283162 |
| 409 | -1 | 283160 |
| 409 | -1 | 283159 |
| 409 | -1 | 283111 |
| 409 | -1 | 283093 |
| 409 | -1 | 283092 |
| 409 | -1 | 282775 |
| 409 | -1 | 282770 |
| 409 | -1 | 282763 |
| 409 | -1 | 26740  |
| 409 | -1 | 26737  |
| 409 | -1 | 26735  |
| 409 | -1 | 26716  |
| 409 | -1 | 26707  |
| 409 | -1 | 26696  |
| 409 | -1 | 26692  |
| 409 | -1 | 26689  |
| 409 | -1 | 26686  |
| 409 | -1 | 26683  |
| 409 | -1 | 26682  |
| 409 | -1 | 26664  |
| 409 | -1 | 26659  |
| 409 | -1 | 26658  |
| 409 | -1 | 26539  |
| 409 | -1 | 26538  |
| 409 | -1 | 26534  |
| 409 | -1 | 26533  |
| 409 | -1 | 26532  |
| 409 | -1 | 26531  |
| 409 | -1 | 26529  |
| 409 | -1 | 26496  |
| 409 | -1 | 26494  |
| 409 | -1 | 26493  |
| 409 | -1 | 26492  |
| 409 | -1 | 26476  |
| 409 | -1 | 26339  |
| 409 | -1 | 26338  |
| 409 | -1 | 26333  |
| 409 | -1 | 26248  |
| 409 | -1 | 26246  |

|     |    |        |
|-----|----|--------|
| 409 | -1 | 26245  |
| 409 | -1 | 26219  |
| 409 | -1 | 26212  |
| 409 | -1 | 26211  |
| 409 | -1 | 26189  |
| 409 | -1 | 26188  |
| 409 | -1 | 256892 |
| 409 | -1 | 256148 |
| 409 | -1 | 256144 |
| 409 | -1 | 255725 |
| 409 | -1 | 254973 |
| 409 | -1 | 254879 |
| 409 | -1 | 254786 |
| 409 | -1 | 254783 |
| 409 | -1 | 23538  |
| 409 | -1 | 219986 |
| 409 | -1 | 219983 |
| 409 | -1 | 219982 |
| 409 | -1 | 219981 |
| 409 | -1 | 219968 |
| 409 | -1 | 219965 |
| 409 | -1 | 219960 |
| 409 | -1 | 219959 |
| 409 | -1 | 219958 |
| 409 | -1 | 219957 |
| 409 | -1 | 219956 |
| 409 | -1 | 219954 |
| 409 | -1 | 219952 |
| 409 | -1 | 219875 |
| 409 | -1 | 219874 |
| 409 | -1 | 219873 |
| 409 | -1 | 219870 |
| 409 | -1 | 219869 |
| 409 | -1 | 219865 |
| 409 | -1 | 219858 |
| 409 | -1 | 219493 |
| 409 | -1 | 219487 |
| 409 | -1 | 219484 |
| 409 | -1 | 219482 |
| 409 | -1 | 219479 |
| 409 | -1 | 219477 |
| 409 | -1 | 219473 |
| 409 | -1 | 219469 |
| 409 | -1 | 219464 |
| 409 | -1 | 219453 |
| 409 | -1 | 219447 |
| 409 | -1 | 219438 |
| 409 | -1 | 219437 |
| 409 | -1 | 219436 |
| 409 | -1 | 219432 |
| 409 | -1 | 219431 |
| 409 | -1 | 219429 |
| 409 | -1 | 219428 |
| 409 | -1 | 219417 |
| 409 | -1 | 196335 |

|     |    |        |
|-----|----|--------|
| 409 | -1 | 162998 |
| 409 | -1 | 158131 |
| 409 | -1 | 150681 |
| 409 | -1 | 144125 |
| 409 | -1 | 144124 |
| 409 | -1 | 143503 |
| 409 | -1 | 143502 |
| 409 | -1 | 143496 |
| 409 | -1 | 138883 |
| 409 | -1 | 138882 |
| 409 | -1 | 138881 |
| 409 | -1 | 138805 |
| 409 | -1 | 138804 |
| 409 | -1 | 138803 |
| 409 | -1 | 138802 |
| 409 | -1 | 138799 |
| 409 | -1 | 135948 |
| 409 | -1 | 135946 |
| 409 | -1 | 135941 |
| 409 | -1 | 135924 |
| 409 | -1 | 134083 |
| 409 | -1 | 130075 |
| 409 | -1 | 128372 |
| 409 | -1 | 128371 |
| 409 | -1 | 128368 |
| 409 | -1 | 128367 |
| 409 | -1 | 128360 |
| 409 | -1 | 127623 |
| 409 | -1 | 127385 |
| 409 | -1 | 127077 |
| 409 | -1 | 127074 |
| 409 | -1 | 127069 |
| 409 | -1 | 127068 |
| 409 | -1 | 127066 |
| 409 | -1 | 127064 |
| 409 | -1 | 127062 |
| 409 | -1 | 127059 |
| 409 | -1 | 126541 |
| 409 | -1 | 126370 |
| 409 | -1 | 125963 |
| 409 | -1 | 125962 |
| 409 | -1 | 125958 |
| 409 | -1 | 124538 |
| 409 | -1 | 122748 |
| 409 | -1 | 122742 |
| 409 | -1 | 122740 |
| 409 | -1 | 121364 |
| 409 | -1 | 121275 |
| 409 | -1 | 121130 |
| 409 | -1 | 120796 |
| 409 | -1 | 120793 |
| 409 | -1 | 120787 |
| 409 | -1 | 120776 |
| 409 | -1 | 120775 |
| 409 | -1 | 120586 |

|      |    |        |
|------|----|--------|
| 409  | -1 | 120066 |
| 409  | -1 | 120065 |
| 409  | -1 | 119774 |
| 409  | -1 | 119772 |
| 409  | -1 | 119765 |
| 409  | -1 | 119764 |
| 409  | -1 | 119749 |
| 409  | -1 | 119695 |
| 409  | -1 | 119694 |
| 409  | -1 | 119692 |
| 409  | -1 | 119687 |
| 409  | -1 | 119682 |
| 409  | -1 | 119679 |
| 409  | -1 | 119678 |
| 409  | -1 | 10798  |
| 4659 | -1 | 93408  |
| 4659 | -1 | 58498  |
| 4659 | -1 | 4636   |
| 4659 | -1 | 4633   |
| 4659 | -1 | 29895  |
| 4659 | -1 | 10627  |
| 4659 | -1 | 10398  |
| 4659 | -1 | 103910 |
| 4659 | -1 | 818    |
| 4659 | -1 | 817    |
| 4659 | -1 | 816    |
| 4659 | -1 | 815    |
| 8864 | -1 | 9575   |
| 8864 | -1 | 4862   |
| 8864 | -1 | 406    |
| 8863 | -1 | 9575   |
| 8863 | -1 | 4862   |
| 8863 | -1 | 406    |
| 5187 | -1 | 9575   |
| 5187 | -1 | 4862   |
| 5187 | -1 | 406    |
| 1454 | -1 | 2737   |
| 1454 | -1 | 2736   |
| 1454 | -1 | 2735   |
| 1454 | -1 | 9575   |
| 1454 | -1 | 4862   |
| 1454 | -1 | 406    |
| 1408 | -1 | 9575   |
| 1408 | -1 | 4862   |
| 1408 | -1 | 406    |
| 1407 | -1 | 9575   |
| 1407 | -1 | 4862   |
| 1407 | -1 | 406    |
| 6494 | -1 | 5908   |
| 6494 | -1 | 5906   |
| 7070 | -1 | 394    |
| 7070 | -1 | 2909   |
| 9063 | -1 | 6778   |
| 9063 | -1 | 6777   |
| 9063 | -1 | 6776   |

|       |    |      |
|-------|----|------|
| 9063  | -1 | 6775 |
| 9063  | -1 | 6774 |
| 9063  | -1 | 6773 |
| 9063  | -1 | 6772 |
| 8554  | -1 | 6778 |
| 8554  | -1 | 6777 |
| 8554  | -1 | 6776 |
| 8554  | -1 | 6775 |
| 8554  | -1 | 6774 |
| 8554  | -1 | 6773 |
| 8554  | -1 | 6772 |
| 51588 | -1 | 6778 |
| 51588 | -1 | 6777 |
| 51588 | -1 | 6776 |
| 51588 | -1 | 6775 |
| 51588 | -1 | 6774 |
| 51588 | -1 | 6773 |
| 51588 | -1 | 6772 |
| 10401 | -1 | 6778 |
| 10401 | -1 | 6777 |
| 10401 | -1 | 6776 |
| 10401 | -1 | 6775 |
| 10401 | -1 | 6774 |
| 10401 | -1 | 6773 |
| 10401 | -1 | 6772 |
| 1154  | -1 | 6778 |
| 1154  | -1 | 6777 |
| 1154  | -1 | 6776 |
| 1154  | -1 | 6775 |
| 1154  | -1 | 6774 |
| 1154  | -1 | 6773 |
| 1154  | -1 | 6772 |
| 5265  | -1 | 5340 |
| 2     | -1 | 2147 |
| 2     | -1 | 5624 |
| 2     | -1 | 5627 |
| 2     | -1 | 5340 |
| 5104  | -1 | 5624 |
| 5104  | -1 | 5627 |
| 5104  | -1 | 2147 |
| 462   | -1 | 2147 |
| 462   | -1 | 2159 |
| 462   | -1 | 2158 |
| 462   | -1 | 2160 |
| 5345  | -1 | 5340 |
| 3053  | -1 | 2147 |
| 7035  | -1 | 2159 |
| 7035  | -1 | 2153 |
| 7035  | -1 | 2152 |
| 7035  | -1 | 2155 |
| 5627  | -1 | 2147 |
| 5627  | -1 | 2157 |
| 5627  | -1 | 2153 |
| 394   | -1 | 387  |
| 2909  | -1 | 387  |

|       |    |        |
|-------|----|--------|
| 29984 | -1 | 27289  |
| 64221 | -1 | 6091   |
| 5998  | -1 | 2773   |
| 5998  | -1 | 2771   |
| 5998  | -1 | 2770   |
| 64750 | -1 | 91     |
| 64750 | -1 | 7046   |
| 64750 | -1 | 130399 |
| 64750 | -1 | 7048   |
| 57154 | -1 | 91     |
| 57154 | -1 | 7046   |
| 57154 | -1 | 130399 |
| 57154 | -1 | 7048   |
| 10468 | -1 | 83729  |
| 10468 | -1 | 3626   |
| 10468 | -1 | 3625   |
| 10468 | -1 | 3624   |
| 7044  | -1 | 4838   |
| 7044  | -1 | 7043   |
| 7044  | -1 | 7042   |
| 7044  | -1 | 7040   |
| 10637 | -1 | 4838   |
| 10637 | -1 | 7043   |
| 10637 | -1 | 7042   |
| 10637 | -1 | 7040   |
| 1634  | -1 | 7043   |
| 1634  | -1 | 7042   |
| 1634  | -1 | 7040   |
| 4052  | -1 | 7043   |
| 4052  | -1 | 7042   |
| 4052  | -1 | 7040   |
| 9241  | -1 | 8200   |
| 9241  | -1 | 656    |
| 9241  | -1 | 655    |
| 9241  | -1 | 654    |
| 9241  | -1 | 653    |
| 9241  | -1 | 652    |
| 9241  | -1 | 650    |
| 9241  | -1 | 392255 |
| 9241  | -1 | 353500 |
| 9241  | -1 | 268    |
| 9241  | -1 | 151449 |
| 8646  | -1 | 8200   |
| 8646  | -1 | 656    |
| 8646  | -1 | 655    |
| 8646  | -1 | 654    |
| 8646  | -1 | 653    |
| 8646  | -1 | 652    |
| 8646  | -1 | 650    |
| 8646  | -1 | 392255 |
| 8646  | -1 | 353500 |
| 8646  | -1 | 268    |
| 8646  | -1 | 151449 |
| 4092  | -1 | 4093   |
| 4092  | -1 | 4090   |

|        |    |       |
|--------|----|-------|
| 4092   | -1 | 4086  |
| 4092   | -1 | 4088  |
| 4092   | -1 | 4087  |
| 4091   | -1 | 4093  |
| 4091   | -1 | 4090  |
| 4091   | -1 | 4086  |
| 4091   | -1 | 4088  |
| 4091   | -1 | 4087  |
| 728622 | -1 | 4088  |
| 728622 | -1 | 4087  |
| 6500   | -1 | 4088  |
| 6500   | -1 | 4087  |
| 9978   | -1 | 4088  |
| 9978   | -1 | 4087  |
| 8454   | -1 | 4088  |
| 8454   | -1 | 4087  |
| 4609   | -1 | 9063  |
| 4609   | -1 | 8554  |
| 4609   | -1 | 51588 |
| 4609   | -1 | 10401 |
| 4609   | -1 | 1030  |
| 8945   | -1 | 2737  |
| 8945   | -1 | 2736  |
| 8945   | -1 | 2735  |
| 23291  | -1 | 2737  |
| 23291  | -1 | 2736  |
| 23291  | -1 | 2735  |
| 9612   | -1 | 3516  |
| 9612   | -1 | 11317 |
| 9541   | -1 | 3516  |
| 9541   | -1 | 11317 |
| 9253   | -1 | 4855  |
| 9253   | -1 | 4854  |
| 9253   | -1 | 4853  |
| 9253   | -1 | 4851  |
| 8650   | -1 | 4855  |
| 8650   | -1 | 4854  |
| 8650   | -1 | 4853  |
| 8650   | -1 | 4851  |
| 3714   | -1 | 4855  |
| 3714   | -1 | 4854  |
| 3714   | -1 | 4853  |
| 3714   | -1 | 4851  |
| 182    | -1 | 4855  |
| 182    | -1 | 4854  |
| 182    | -1 | 4853  |
| 182    | -1 | 4851  |
| 57680  | -1 | 1499  |
| 64321  | -1 | 83439 |
| 64321  | -1 | 6934  |
| 64321  | -1 | 6932  |
| 64321  | -1 | 51176 |
| 56998  | -1 | 1499  |
| 59343  | -1 | 1857  |
| 59343  | -1 | 1856  |

|       |    |       |
|-------|----|-------|
| 59343 | -1 | 1855  |
| 80319 | -1 | 1857  |
| 80319 | -1 | 1856  |
| 80319 | -1 | 1855  |
| 11197 | -1 | 89780 |
| 11197 | -1 | 81029 |
| 11197 | -1 | 80326 |
| 11197 | -1 | 7484  |
| 11197 | -1 | 7483  |
| 11197 | -1 | 7482  |
| 11197 | -1 | 7481  |
| 11197 | -1 | 7480  |
| 11197 | -1 | 7479  |
| 11197 | -1 | 7478  |
| 11197 | -1 | 7477  |
| 11197 | -1 | 7476  |
| 11197 | -1 | 7475  |
| 11197 | -1 | 7474  |
| 11197 | -1 | 7473  |
| 11197 | -1 | 7472  |
| 11197 | -1 | 7471  |
| 11197 | -1 | 54361 |
| 11197 | -1 | 51384 |
| 9350  | -1 | 89780 |
| 9350  | -1 | 81029 |
| 9350  | -1 | 80326 |
| 9350  | -1 | 7484  |
| 9350  | -1 | 7483  |
| 9350  | -1 | 7482  |
| 9350  | -1 | 7481  |
| 9350  | -1 | 7480  |
| 9350  | -1 | 7479  |
| 9350  | -1 | 7478  |
| 9350  | -1 | 7477  |
| 9350  | -1 | 7476  |
| 9350  | -1 | 7475  |
| 9350  | -1 | 7474  |
| 9350  | -1 | 7473  |
| 9350  | -1 | 7472  |
| 9350  | -1 | 7471  |
| 9350  | -1 | 54361 |
| 9350  | -1 | 51384 |
| 6425  | -1 | 8326  |
| 6425  | -1 | 8325  |
| 6425  | -1 | 8324  |
| 6425  | -1 | 8323  |
| 6425  | -1 | 8322  |
| 6425  | -1 | 8321  |
| 6425  | -1 | 7976  |
| 6425  | -1 | 7855  |
| 6425  | -1 | 2535  |
| 6425  | -1 | 11211 |
| 6425  | -1 | 89780 |
| 6425  | -1 | 81029 |
| 6425  | -1 | 80326 |

|      |    |       |
|------|----|-------|
| 6425 | -1 | 7484  |
| 6425 | -1 | 7483  |
| 6425 | -1 | 7482  |
| 6425 | -1 | 7481  |
| 6425 | -1 | 7480  |
| 6425 | -1 | 7479  |
| 6425 | -1 | 7478  |
| 6425 | -1 | 7477  |
| 6425 | -1 | 7476  |
| 6425 | -1 | 7475  |
| 6425 | -1 | 7474  |
| 6425 | -1 | 7473  |
| 6425 | -1 | 7472  |
| 6425 | -1 | 7471  |
| 6425 | -1 | 54361 |
| 6425 | -1 | 51384 |
| 6424 | -1 | 8326  |
| 6424 | -1 | 8325  |
| 6424 | -1 | 8324  |
| 6424 | -1 | 8323  |
| 6424 | -1 | 8322  |
| 6424 | -1 | 8321  |
| 6424 | -1 | 7976  |
| 6424 | -1 | 7855  |
| 6424 | -1 | 2535  |
| 6424 | -1 | 11211 |
| 6424 | -1 | 89780 |
| 6424 | -1 | 81029 |
| 6424 | -1 | 80326 |
| 6424 | -1 | 7484  |
| 6424 | -1 | 7483  |
| 6424 | -1 | 7482  |
| 6424 | -1 | 7481  |
| 6424 | -1 | 7480  |
| 6424 | -1 | 7479  |
| 6424 | -1 | 7478  |
| 6424 | -1 | 7477  |
| 6424 | -1 | 7476  |
| 6424 | -1 | 7475  |
| 6424 | -1 | 7474  |
| 6424 | -1 | 7473  |
| 6424 | -1 | 7472  |
| 6424 | -1 | 7471  |
| 6424 | -1 | 54361 |
| 6424 | -1 | 51384 |
| 6423 | -1 | 白蘭 摧  |
| 6423 | -1 | 8325  |
| 6423 | -1 | 8324  |
| 6423 | -1 | 8323  |
| 6423 | -1 | 8322  |
| 6423 | -1 | 8321  |
| 6423 | -1 | 7976  |
| 6423 | -1 | 7855  |
| 6423 | -1 | 2535  |
| 6423 | -1 | 11211 |

|      |    |       |
|------|----|-------|
| 6423 | -1 | 89780 |
| 6423 | -1 | 81029 |
| 6423 | -1 | 80326 |
| 6423 | -1 | 7484  |
| 6423 | -1 | 7483  |
| 6423 | -1 | 7482  |
| 6423 | -1 | 7481  |
| 6423 | -1 | 7480  |
| 6423 | -1 | 7479  |
| 6423 | -1 | 7478  |
| 6423 | -1 | 7477  |
| 6423 | -1 | 7476  |
| 6423 | -1 | 7475  |
| 6423 | -1 | 7474  |
| 6423 | -1 | 7473  |
| 6423 | -1 | 7472  |
| 6423 | -1 | 7471  |
| 6423 | -1 | 54361 |
| 6423 | -1 | 51384 |
| 6422 | -1 | 8326  |
| 6422 | -1 | 8325  |
| 6422 | -1 | 8324  |
| 6422 | -1 | 8323  |
| 6422 | -1 | 8322  |
| 6422 | -1 | 8321  |
| 6422 | -1 | 7976  |
| 6422 | -1 | 7855  |
| 6422 | -1 | 2535  |
| 6422 | -1 | 11211 |
| 6422 | -1 | 89780 |
| 6422 | -1 | 81029 |
| 6422 | -1 | 80326 |
| 6422 | -1 | 7484  |
| 6422 | -1 | 7483  |
| 6422 | -1 | 7482  |
| 6422 | -1 | 7481  |
| 6422 | -1 | 7480  |
| 6422 | -1 | 7479  |
| 6422 | -1 | 7478  |
| 6422 | -1 | 7477  |
| 6422 | -1 | 7476  |
| 6422 | -1 | 7475  |
| 6422 | -1 | 7474  |
| 6422 | -1 | 7473  |
| 6422 | -1 | 7472  |
| 6422 | -1 | 7471  |
| 6422 | -1 | 54361 |
| 6422 | -1 | 51384 |
| 8837 | -1 | 8717  |
| 8837 | -1 | 8772  |
| 596  | -1 | 7157  |
| 331  | -1 | 842   |
| 331  | -1 | 840   |
| 331  | -1 | 836   |
| 331  | -1 | 839   |

|      |    |        |
|------|----|--------|
| 330  | -1 | 842    |
| 330  | -1 | 840    |
| 330  | -1 | 836    |
| 330  | -1 | 839    |
| 329  | -1 | 842    |
| 329  | -1 | 840    |
| 329  | -1 | 836    |
| 329  | -1 | 839    |
| 7249 | -1 | 6009   |
| 1978 | -1 | 9470   |
| 1978 | -1 | 253314 |
| 1978 | -1 | 1977   |
| 3486 | -1 | 3479   |
| 2810 | -1 | 983    |
| 2810 | -1 | 9133   |
| 2810 | -1 | 891    |
| 2810 | -1 | 85417  |
| 1032 | -1 | 896    |
| 1032 | -1 | 894    |
| 1032 | -1 | 595    |
| 1032 | -1 | 1021   |
| 1032 | -1 | 1019   |
| 1031 | -1 | 896    |
| 1031 | -1 | 894    |
| 1031 | -1 | 595    |
| 1031 | -1 | 1021   |
| 1031 | -1 | 1019   |
| 1030 | -1 | 896    |
| 1030 | -1 | 894    |
| 1030 | -1 | 595    |
| 1030 | -1 | 1021   |
| 1030 | -1 | 1019   |
| 1029 | -1 | 4193   |
| 1029 | -1 | 896    |
| 1029 | -1 | 894    |
| 1029 | -1 | 595    |
| 1029 | -1 | 1021   |
| 1029 | -1 | 1019   |
| 9134 | -1 | 5925   |
| 9134 | -1 | 1028   |
| 9134 | -1 | 1027   |
| 898  | -1 | 5925   |
| 898  | -1 | 1028   |
| 898  | -1 | 1027   |
| 1026 | -1 | 8900   |
| 1026 | -1 | 890    |
| 1026 | -1 | 9134   |
| 1026 | -1 | 898    |
| 1026 | -1 | 1017   |
| 1026 | -1 | 896    |
| 1026 | -1 | 894    |
| 1026 | -1 | 595    |
| 1026 | -1 | 1021   |
| 1026 | -1 | 1019   |
| 8900 | -1 | 1871   |

|      |    |       |
|------|----|-------|
| 8900 | -1 | 1870  |
| 8900 | -1 | 1869  |
| 8900 | -1 | 990   |
| 8900 | -1 | 5925  |
| 890  | -1 | 1871  |
| 890  | -1 | 1870  |
| 890  | -1 | 1869  |
| 890  | -1 | 990   |
| 890  | -1 | 5925  |
| 1017 | -1 | 1871  |
| 1017 | -1 | 1870  |
| 1017 | -1 | 1869  |
| 1017 | -1 | 990   |
| 1017 | -1 | 5925  |
| 1017 | -1 | 1028  |
| 1017 | -1 | 1027  |
| 1028 | -1 | 8900  |
| 1028 | -1 | 890   |
| 1028 | -1 | 1017  |
| 1028 | -1 | 896   |
| 1028 | -1 | 894   |
| 1028 | -1 | 595   |
| 1028 | -1 | 1021  |
| 1028 | -1 | 1019  |
| 896  | -1 | 5934  |
| 896  | -1 | 5933  |
| 896  | -1 | 5925  |
| 894  | -1 | 5934  |
| 894  | -1 | 5933  |
| 894  | -1 | 5925  |
| 595  | -1 | 5934  |
| 595  | -1 | 5933  |
| 595  | -1 | 5925  |
| 1021 | -1 | 5934  |
| 1021 | -1 | 5933  |
| 1021 | -1 | 5925  |
| 1019 | -1 | 5934  |
| 1019 | -1 | 5933  |
| 1019 | -1 | 5925  |
| 1027 | -1 | 9134  |
| 1027 | -1 | 898   |
| 1027 | -1 | 8900  |
| 1027 | -1 | 890   |
| 1027 | -1 | 1017  |
| 1027 | -1 | 896   |
| 1027 | -1 | 894   |
| 1027 | -1 | 595   |
| 1027 | -1 | 1021  |
| 1027 | -1 | 1019  |
| 5350 | -1 | 489   |
| 5350 | -1 | 488   |
| 5350 | -1 | 487   |
| 5350 | -1 | 1E+08 |
| 3312 | -1 | 5602  |
| 3312 | -1 | 5601  |

|        |    |        |
|--------|----|--------|
| 3312   | -1 | 5599   |
| 3310   | -1 | 5602   |
| 3310   | -1 | 5601   |
| 3310   | -1 | 5599   |
| 3306   | -1 | 5602   |
| 3306   | -1 | 5601   |
| 3306   | -1 | 5599   |
| 3305   | -1 | 5602   |
| 3305   | -1 | 5601   |
| 3305   | -1 | 5599   |
| 3304   | -1 | 5602   |
| 3304   | -1 | 5601   |
| 3304   | -1 | 5599   |
| 3303   | -1 | 5602   |
| 3303   | -1 | 5601   |
| 3303   | -1 | 5599   |
| 4763   | -1 | 6237   |
| 4763   | -1 | 4893   |
| 4763   | -1 | 3845   |
| 4763   | -1 | 3265   |
| 4763   | -1 | 22808  |
| 4763   | -1 | 22800  |
| 3784   | 1  | 115    |
| 3784   | 1  | 109    |
| 3784   | 1  | 6558   |
| 3784   | 1  | 5616   |
| 3784   | 1  | 5613   |
| 3784   | 1  | 5568   |
| 3784   | 1  | 5567   |
| 3784   | 1  | 5566   |
| 6558   | 1  | 115    |
| 6558   | 1  | 109    |
| 6558   | 1  | 5616   |
| 6558   | 1  | 5613   |
| 6558   | 1  | 5568   |
| 6558   | 1  | 5567   |
| 6558   | 1  | 5566   |
| 90993  | -1 | 2033   |
| 90993  | -1 | 1387   |
| 84699  | -1 | 2033   |
| 84699  | -1 | 1387   |
| 64764  | -1 | 2033   |
| 64764  | -1 | 1387   |
| 148327 | -1 | 2033   |
| 148327 | -1 | 1387   |
| 10488  | -1 | 2033   |
| 10488  | -1 | 1387   |
| 4215   | 1  | 650832 |
| 4215   | 1  | 5608   |
| 4215   | 1  | 5606   |
| 468    | -1 | 2033   |
| 468    | -1 | 1387   |
| 8569   | 1  | 9470   |
| 8569   | 1  | 253314 |
| 8569   | 1  | 1977   |

|      |    |        |
|------|----|--------|
| 2872 | 1  | 9470   |
| 2872 | 1  | 253314 |
| 2872 | 1  | 1977   |
| 5577 | -1 | 572    |
| 5577 | 1  | 3991   |
| 5576 | -1 | 572    |
| 5576 | 1  | 3991   |
| 5575 | -1 | 572    |
| 5575 | 1  | 3991   |
| 5573 | -1 | 572    |
| 5573 | 1  | 3991   |
| 5261 | 1  | 5837   |
| 5261 | 1  | 5836   |
| 5261 | 1  | 5834   |
| 5260 | 1  | 5837   |
| 5260 | 1  | 5836   |
| 5260 | 1  | 5834   |
| 5257 | 1  | 5837   |
| 5257 | 1  | 5836   |
| 5257 | 1  | 5834   |
| 5256 | 1  | 5837   |
| 5256 | 1  | 5836   |
| 5256 | 1  | 5834   |
| 5255 | 1  | 5837   |
| 5255 | 1  | 5836   |
| 5255 | 1  | 5834   |
| 5502 | -1 | 5501   |
| 5502 | -1 | 5500   |
| 5502 | -1 | 5499   |
| 5502 | -1 | 4659   |
| 695  | 1  | 5335   |
| 3932 | 1  | 7305   |
| 1453 | -1 | 2737   |
| 1453 | -1 | 2736   |
| 1453 | -1 | 2735   |
| 1453 | -1 | 9575   |
| 1453 | -1 | 4862   |
| 1453 | -1 | 406    |
| 1453 | 1  | 2697   |
| 5590 | -1 | 8660   |
| 5590 | -1 | 8471   |
| 5590 | -1 | 3667   |
| 5590 | 1  | 56288  |
| 5584 | 1  | 56288  |
| 2241 | -1 | 1500   |
| 2241 | -1 | 1499   |
| 7525 | -1 | 1500   |
| 7525 | 1  | 2241   |
| 7525 | 1  | 2534   |
| 1460 | 1  | 1499   |
| 1459 | 1  | 1499   |
| 1457 | 1  | 1499   |
| 3985 | -1 | 1073   |
| 3985 | -1 | 1072   |
| 3984 | -1 | 1073   |

|       |    |        |
|-------|----|--------|
| 3984  | -1 | 1072   |
| 2242  | 1  | 55558  |
| 2242  | 1  | 5362   |
| 2242  | 1  | 5361   |
| 2242  | 1  | 1808   |
| 2932  | -1 | 9586   |
| 2932  | -1 | 90993  |
| 2932  | -1 | 84699  |
| 2932  | -1 | 64764  |
| 2932  | -1 | 468    |
| 2932  | -1 | 148327 |
| 2932  | -1 | 1385   |
| 2932  | -1 | 10488  |
| 2932  | -1 | 2998   |
| 2932  | -1 | 2997   |
| 2932  | -1 | 4776   |
| 2932  | -1 | 4775   |
| 2932  | -1 | 4773   |
| 2932  | -1 | 4772   |
| 2932  | -1 | 10725  |
| 2932  | -1 | 2737   |
| 2932  | -1 | 2736   |
| 2932  | -1 | 2735   |
| 2932  | -1 | 1499   |
| 2932  | -1 | 896    |
| 2932  | -1 | 894    |
| 2932  | -1 | 595    |
| 2932  | 1  | 1808   |
| 983   | -1 | 57369  |
| 983   | -1 | 2697   |
| 1022  | 1  | 983    |
| 5605  | 1  | 5294   |
| 5605  | 1  | 5293   |
| 5605  | 1  | 5291   |
| 5605  | 1  | 5290   |
| 5604  | -1 | 572    |
| 5604  | 1  | 5294   |
| 5604  | 1  | 5293   |
| 5604  | 1  | 5291   |
| 5604  | 1  | 5290   |
| 5604  | 1  | 5602   |
| 5604  | 1  | 5601   |
| 5604  | 1  | 5599   |
| 79660 | -1 | 810    |
| 79660 | -1 | 808    |
| 79660 | -1 | 805    |
| 79660 | -1 | 801    |
| 79660 | -1 | 5261   |
| 79660 | -1 | 5260   |
| 79660 | -1 | 5257   |
| 79660 | -1 | 5256   |
| 79660 | -1 | 5255   |
| 79660 | -1 | 51806  |
| 79660 | -1 | 163688 |
| 79660 | 1  | 2998   |

|       |    |        |
|-------|----|--------|
| 79660 | 1  | 2997   |
| 5509  | -1 | 810    |
| 5509  | -1 | 808    |
| 5509  | -1 | 805    |
| 5509  | -1 | 801    |
| 5509  | -1 | 5261   |
| 5509  | -1 | 5260   |
| 5509  | -1 | 5257   |
| 5509  | -1 | 5256   |
| 5509  | -1 | 5255   |
| 5509  | -1 | 51806  |
| 5509  | -1 | 163688 |
| 5509  | 1  | 2998   |
| 5509  | 1  | 2997   |
| 5507  | -1 | 810    |
| 5507  | -1 | 808    |
| 5507  | -1 | 805    |
| 5507  | -1 | 801    |
| 5507  | -1 | 5261   |
| 5507  | -1 | 5260   |
| 5507  | -1 | 5257   |
| 5507  | -1 | 5256   |
| 5507  | -1 | 5255   |
| 5507  | -1 | 51806  |
| 5507  | -1 | 163688 |
| 5507  | 1  | 2998   |
| 5507  | 1  | 2997   |
| 5506  | -1 | 810    |
| 5506  | -1 | 808    |
| 5506  | -1 | 805    |
| 5506  | -1 | 801    |
| 5506  | -1 | 5261   |
| 5506  | -1 | 5260   |
| 5506  | -1 | 5257   |
| 5506  | -1 | 5256   |
| 5506  | -1 | 5255   |
| 5506  | -1 | 51806  |
| 5506  | -1 | 163688 |
| 5506  | 1  | 2998   |
| 5506  | 1  | 2997   |
| 5501  | -1 | 810    |
| 5501  | -1 | 808    |
| 5501  | -1 | 805    |
| 5501  | -1 | 801    |
| 5501  | -1 | 5261   |
| 5501  | -1 | 5260   |
| 5501  | -1 | 5257   |
| 5501  | -1 | 5256   |
| 5501  | -1 | 5255   |
| 5501  | -1 | 51806  |
| 5501  | -1 | 163688 |
| 5501  | -1 | 93408  |
| 5501  | -1 | 58498  |
| 5501  | -1 | 4636   |
| 5501  | -1 | 4633   |

|      |    |        |
|------|----|--------|
| 5501 | -1 | 29895  |
| 5501 | -1 | 10627  |
| 5501 | -1 | 10398  |
| 5501 | -1 | 103910 |
| 5501 | -1 | 818    |
| 5501 | -1 | 817    |
| 5501 | -1 | 816    |
| 5501 | -1 | 815    |
| 5501 | 1  | 2998   |
| 5501 | 1  | 2997   |
| 5500 | -1 | 810    |
| 5500 | -1 | 808    |
| 5500 | -1 | 805    |
| 5500 | -1 | 801    |
| 5500 | -1 | 5261   |
| 5500 | -1 | 5260   |
| 5500 | -1 | 5257   |
| 5500 | -1 | 5256   |
| 5500 | -1 | 5255   |
| 5500 | -1 | 51806  |
| 5500 | -1 | 163688 |
| 5500 | -1 | 93408  |
| 5500 | -1 | 58498  |
| 5500 | -1 | 4636   |
| 5500 | -1 | 4633   |
| 5500 | -1 | 29895  |
| 5500 | -1 | 10627  |
| 5500 | -1 | 10398  |
| 5500 | -1 | 103910 |
| 5500 | -1 | 818    |
| 5500 | -1 | 817    |
| 5500 | -1 | 816    |
| 5500 | -1 | 815    |
| 5500 | 1  | 2998   |
| 5500 | 1  | 2997   |
| 5499 | -1 | 810    |
| 5499 | -1 | 808    |
| 5499 | -1 | 805    |
| 5499 | -1 | 801    |
| 5499 | -1 | 5261   |
| 5499 | -1 | 5260   |
| 5499 | -1 | 5257   |
| 5499 | -1 | 5256   |
| 5499 | -1 | 5255   |
| 5499 | -1 | 51806  |
| 5499 | -1 | 163688 |
| 5499 | -1 | 93408  |
| 5499 | -1 | 58498  |
| 5499 | -1 | 4636   |
| 5499 | -1 | 4633   |
| 5499 | -1 | 29895  |
| 5499 | -1 | 10627  |
| 5499 | -1 | 10398  |
| 5499 | -1 | 103910 |
| 5499 | -1 | 818    |

|      |    |      |
|------|----|------|
| 5499 | -1 | 817  |
| 5499 | -1 | 816  |
| 5499 | -1 | 815  |
| 5499 | 1  | 2998 |
| 5499 | 1  | 2997 |
| 5795 | 1  | 1500 |
| 5770 | -1 | 8660 |
| 5770 | -1 | 8471 |
| 5770 | -1 | 3667 |
| 5770 | -1 | 3643 |
| 5770 | 1  | 1499 |
| 5792 | -1 | 8660 |
| 5792 | -1 | 8471 |
| 5792 | -1 | 3667 |
| 5792 | -1 | 3643 |
| 5792 | 1  | 1499 |
| 5787 | 1  | 1499 |
| 5797 | 1  | 1500 |
| 5797 | 1  | 1499 |
| 52   | 1  | 1499 |
| 572  | -1 | 598  |
| 5170 | 1  | 6199 |
| 5170 | 1  | 6198 |
| 208  | -1 | 2309 |
| 208  | -1 | 2308 |
| 208  | -1 | 842  |
| 208  | -1 | 7249 |
| 208  | -1 | 1026 |
| 208  | -1 | 1027 |
| 208  | -1 | 2932 |
| 208  | -1 | 572  |
| 208  | -1 | 6416 |
| 208  | -1 | 4217 |
| 208  | 1  | 4193 |
| 208  | 1  | 5140 |
| 208  | 1  | 5139 |
| 208  | 1  | 4846 |
| 208  | 1  | 8517 |
| 208  | 1  | 3551 |
| 208  | 1  | 1147 |
| 208  | 1  | 2475 |
| 208  | 1  | 598  |
| 207  | -1 | 2309 |
| 207  | -1 | 2308 |
| 207  | -1 | 842  |
| 207  | -1 | 7249 |
| 207  | -1 | 1026 |
| 207  | -1 | 1027 |
| 207  | -1 | 2932 |
| 207  | -1 | 572  |
| 207  | -1 | 6416 |
| 207  | -1 | 4217 |
| 207  | 1  | 4193 |
| 207  | 1  | 5140 |
| 207  | 1  | 5139 |

|       |    |       |
|-------|----|-------|
| 207   | 1  | 4846  |
| 207   | 1  | 8517  |
| 207   | 1  | 3551  |
| 207   | 1  | 1147  |
| 207   | 1  | 2475  |
| 207   | 1  | 598   |
| 10000 | -1 | 2309  |
| 10000 | -1 | 2308  |
| 10000 | -1 | 842   |
| 10000 | -1 | 7249  |
| 10000 | -1 | 1026  |
| 10000 | -1 | 1027  |
| 10000 | -1 | 2932  |
| 10000 | -1 | 572   |
| 10000 | -1 | 6416  |
| 10000 | -1 | 4217  |
| 10000 | 1  | 4193  |
| 10000 | 1  | 5140  |
| 10000 | 1  | 5139  |
| 10000 | 1  | 4846  |
| 10000 | 1  | 8517  |
| 10000 | 1  | 3551  |
| 10000 | 1  | 1147  |
| 10000 | 1  | 2475  |
| 10000 | 1  | 598   |
| 861   | -1 | 1050  |
| 861   | -1 | 6688  |
| 861   | 1  | 3066  |
| 861   | 1  | 3065  |
| 861   | 1  | 1488  |
| 861   | 1  | 1487  |
| 3066  | -1 | 3516  |
| 3066  | -1 | 11317 |
| 3065  | -1 | 3516  |
| 3065  | -1 | 11317 |
| 1488  | -1 | 3516  |
| 1488  | -1 | 11317 |
| 1488  | -1 | 83439 |
| 1488  | -1 | 6934  |
| 1488  | -1 | 6932  |
| 1488  | -1 | 51176 |
| 1487  | -1 | 3516  |
| 1487  | -1 | 11317 |
| 1487  | -1 | 83439 |
| 1487  | -1 | 6934  |
| 1487  | -1 | 6932  |
| 1487  | -1 | 51176 |
| 2122  | -1 | 5602  |
| 2122  | -1 | 5601  |
| 2122  | -1 | 5599  |
| 2122  | 1  | 3066  |
| 2122  | 1  | 3065  |
| 2122  | 1  | 1488  |
| 2122  | 1  | 1487  |
| 10928 | -1 | 998   |

|       |    |        |
|-------|----|--------|
| 10928 | -1 | 5881   |
| 10928 | -1 | 5880   |
| 10928 | -1 | 5879   |
| 5899  | 1  | 5337   |
| 5899  | 1  | 10928  |
| 5898  | 1  | 5337   |
| 5898  | 1  | 10928  |
| 5900  | 1  | 5881   |
| 5900  | 1  | 5880   |
| 5900  | 1  | 5879   |
| 5900  | 1  | 387    |
| 5900  | 1  | 5899   |
| 5900  | 1  | 5898   |
| 613   | 1  | 6464   |
| 613   | 1  | 53358  |
| 613   | 1  | 399694 |
| 613   | 1  | 25759  |
| 613   | 1  | 868    |
| 613   | 1  | 867    |
| 613   | 1  | 23624  |
| 613   | 1  | 1399   |
| 613   | 1  | 1398   |
| 613   | 1  | 2885   |
| 613   | 1  | 6777   |
| 613   | 1  | 6776   |
| 868   | -1 | 7535   |
| 868   | -1 | 2534   |
| 868   | -1 | 3932   |
| 868   | -1 | 7297   |
| 868   | -1 | 3718   |
| 868   | -1 | 3717   |
| 868   | -1 | 3716   |
| 868   | -1 | 9180   |
| 868   | -1 | 64109  |
| 868   | -1 | 58985  |
| 868   | -1 | 5618   |
| 868   | -1 | 53833  |
| 868   | -1 | 53832  |
| 868   | -1 | 50615  |
| 868   | -1 | 4352   |
| 868   | -1 | 3977   |
| 868   | -1 | 3953   |
| 868   | -1 | 3601   |
| 868   | -1 | 3598   |
| 868   | -1 | 3597   |
| 868   | -1 | 3595   |
| 868   | -1 | 3594   |
| 868   | -1 | 3590   |
| 868   | -1 | 3588   |
| 868   | -1 | 3587   |
| 868   | -1 | 3581   |
| 868   | -1 | 3575   |
| 868   | -1 | 3572   |
| 868   | -1 | 3570   |
| 868   | -1 | 3568   |

|     |    |        |
|-----|----|--------|
| 868 | -1 | 3566   |
| 868 | -1 | 3563   |
| 868 | -1 | 3561   |
| 868 | -1 | 3560   |
| 868 | -1 | 3559   |
| 868 | -1 | 3460   |
| 868 | -1 | 3459   |
| 868 | -1 | 3455   |
| 868 | -1 | 3454   |
| 868 | -1 | 2690   |
| 868 | -1 | 2057   |
| 868 | -1 | 163702 |
| 868 | -1 | 149233 |
| 868 | -1 | 1441   |
| 868 | -1 | 1439   |
| 868 | -1 | 1438   |
| 868 | -1 | 1271   |
| 868 | -1 | 116379 |
| 868 | 1  | 8503   |
| 868 | 1  | 5296   |
| 868 | 1  | 5295   |
| 868 | 1  | 5294   |
| 868 | 1  | 5293   |
| 868 | 1  | 5291   |
| 868 | 1  | 5290   |
| 868 | 1  | 23533  |
| 867 | -1 | 7535   |
| 867 | -1 | 2534   |
| 867 | -1 | 3932   |
| 867 | -1 | 7297   |
| 867 | -1 | 3718   |
| 867 | -1 | 3717   |
| 867 | -1 | 3716   |
| 867 | -1 | 9180   |
| 867 | -1 | 64109  |
| 867 | -1 | 58985  |
| 867 | -1 | 5618   |
| 867 | -1 | 53833  |
| 867 | -1 | 53832  |
| 867 | -1 | 50615  |
| 867 | -1 | 4352   |
| 867 | -1 | 3977   |
| 867 | -1 | 3953   |
| 867 | -1 | 3601   |
| 867 | -1 | 3598   |
| 867 | -1 | 3597   |
| 867 | -1 | 3595   |
| 867 | -1 | 3594   |
| 867 | -1 | 3590   |
| 867 | -1 | 3588   |
| 867 | -1 | 3587   |
| 867 | -1 | 3581   |
| 867 | -1 | 3575   |
| 867 | -1 | 3572   |
| 867 | -1 | 3570   |

|       |    |        |
|-------|----|--------|
| 867   | -1 | 3568   |
| 867   | -1 | 3566   |
| 867   | -1 | 3563   |
| 867   | -1 | 3561   |
| 867   | -1 | 3560   |
| 867   | -1 | 3559   |
| 867   | -1 | 3460   |
| 867   | -1 | 3459   |
| 867   | -1 | 3455   |
| 867   | -1 | 3454   |
| 867   | -1 | 2690   |
| 867   | -1 | 2057   |
| 867   | -1 | 163702 |
| 867   | -1 | 149233 |
| 867   | -1 | 1441   |
| 867   | -1 | 1439   |
| 867   | -1 | 1438   |
| 867   | -1 | 1271   |
| 867   | -1 | 116379 |
| 867   | 1  | 8503   |
| 867   | 1  | 5296   |
| 867   | 1  | 5295   |
| 867   | 1  | 5294   |
| 867   | 1  | 5293   |
| 867   | 1  | 5291   |
| 867   | 1  | 5290   |
| 867   | 1  | 23533  |
| 23624 | -1 | 7535   |
| 23624 | -1 | 2534   |
| 23624 | -1 | 3932   |
| 23624 | -1 | 7297   |
| 23624 | -1 | 3718   |
| 23624 | -1 | 3717   |
| 23624 | -1 | 3716   |
| 23624 | -1 | 9180   |
| 23624 | -1 | 64109  |
| 23624 | -1 | 58985  |
| 23624 | -1 | 5618   |
| 23624 | -1 | 53833  |
| 23624 | -1 | 53832  |
| 23624 | -1 | 50615  |
| 23624 | -1 | 4352   |
| 23624 | -1 | 3977   |
| 23624 | -1 | 3953   |
| 23624 | -1 | 3601   |
| 23624 | -1 | 3598   |
| 23624 | -1 | 3597   |
| 23624 | -1 | 3595   |
| 23624 | -1 | 3594   |
| 23624 | -1 | 3590   |
| 23624 | -1 | 3588   |
| 23624 | -1 | 3587   |
| 23624 | -1 | 3581   |
| 23624 | -1 | 3575   |
| 23624 | -1 | 3572   |

|       |    |        |
|-------|----|--------|
| 23624 | -1 | 3570   |
| 23624 | -1 | 3568   |
| 23624 | -1 | 3566   |
| 23624 | -1 | 3563   |
| 23624 | -1 | 3561   |
| 23624 | -1 | 3560   |
| 23624 | -1 | 3559   |
| 23624 | -1 | 3460   |
| 23624 | -1 | 3459   |
| 23624 | -1 | 3455   |
| 23624 | -1 | 3454   |
| 23624 | -1 | 2690   |
| 23624 | -1 | 2057   |
| 23624 | -1 | 163702 |
| 23624 | -1 | 149233 |
| 23624 | -1 | 1441   |
| 23624 | -1 | 1439   |
| 23624 | -1 | 1438   |
| 23624 | -1 | 1271   |
| 23624 | -1 | 116379 |
| 23624 | 1  | 8503   |
| 23624 | 1  | 5296   |
| 23624 | 1  | 5295   |
| 23624 | 1  | 5294   |
| 23624 | 1  | 5293   |
| 23624 | 1  | 5291   |
| 23624 | 1  | 5290   |
| 23624 | 1  | 23533  |
| 9181  | 1  | 387    |
| 102   | 1  | 1839   |
| 8517  | -1 | 8660   |
| 8517  | -1 | 8471   |
| 8517  | -1 | 3667   |
| 8517  | 1  | 4792   |
| 1906  | 1  | 1910   |
| 4157  | 1  | 2778   |
| 5443  | 1  | 4157   |
| 4313  | 1  | 1839   |
| 2797  | 1  | 2798   |
| 2798  | 1  | 2776   |
| 2798  | 1  | 2767   |
| 2798  | 1  | 2778   |
| 2796  | 1  | 2798   |
| 8660  | 1  | 8503   |
| 8660  | 1  | 5296   |
| 8660  | 1  | 5295   |
| 8660  | 1  | 5294   |
| 8660  | 1  | 5293   |
| 8660  | 1  | 5291   |
| 8660  | 1  | 5290   |
| 8660  | 1  | 23533  |
| 8660  | 1  | 2885   |
| 8471  | 1  | 8503   |
| 8471  | 1  | 5296   |
| 8471  | 1  | 5295   |

|       |    |        |
|-------|----|--------|
| 8471  | 1  | 5294   |
| 8471  | 1  | 5293   |
| 8471  | 1  | 5291   |
| 8471  | 1  | 5290   |
| 8471  | 1  | 23533  |
| 8471  | 1  | 2885   |
| 3667  | 1  | 8503   |
| 3667  | 1  | 5296   |
| 3667  | 1  | 5295   |
| 3667  | 1  | 5294   |
| 3667  | 1  | 5293   |
| 3667  | 1  | 5291   |
| 3667  | 1  | 5290   |
| 3667  | 1  | 23533  |
| 3667  | 1  | 2885   |
| 3643  | 1  | 8660   |
| 3643  | 1  | 8471   |
| 3643  | 1  | 3667   |
| 3643  | 1  | 6464   |
| 3643  | 1  | 53358  |
| 3643  | 1  | 399694 |
| 3643  | 1  | 25759  |
| 3643  | 1  | 868    |
| 3643  | 1  | 867    |
| 3643  | 1  | 23624  |
| 3643  | 1  | 10603  |
| 3630  | 1  | 5159   |
| 3630  | 1  | 5156   |
| 3630  | 1  | 3645   |
| 3630  | 1  | 3480   |
| 3630  | 1  | 2263   |
| 3630  | 1  | 2260   |
| 3630  | 1  | 2064   |
| 3630  | 1  | 1956   |
| 3630  | 1  | 3643   |
| 7074  | 1  | 5881   |
| 7074  | 1  | 5880   |
| 7074  | 1  | 5879   |
| 26230 | 1  | 5881   |
| 26230 | 1  | 5880   |
| 26230 | 1  | 5879   |
| 28964 | -1 | 5829   |
| 8874  | -1 | 9138   |
| 8874  | -1 | 23365  |
| 8874  | 1  | 5881   |
| 8874  | 1  | 5880   |
| 8874  | 1  | 5879   |
| 8874  | 1  | 28964  |
| 55845 | 1  | 81873  |
| 55845 | 1  | 653888 |
| 55845 | 1  | 10552  |
| 55845 | 1  | 10109  |
| 55845 | 1  | 10095  |
| 55845 | 1  | 10094  |
| 55845 | 1  | 10093  |

|       |    |        |
|-------|----|--------|
| 55845 | 1  | 10092  |
| 324   | 1  | 50649  |
| 50649 | 1  | 5881   |
| 50649 | 1  | 5880   |
| 50649 | 1  | 5879   |
| 10297 | 1  | 50649  |
| 81873 | 1  | 71     |
| 81873 | 1  | 648921 |
| 81873 | 1  | 646821 |
| 81873 | 1  | 646048 |
| 81873 | 1  | 60     |
| 10092 | 1  | 71     |
| 10092 | 1  | 648921 |
| 10092 | 1  | 646821 |
| 10092 | 1  | 646048 |
| 10092 | 1  | 60     |
| 81624 | 1  | 10458  |
| 89846 | 1  | 998    |
| 2245  | 1  | 998    |
| 1132  | 1  | 55970  |
| 3687  | 1  | 5747   |
| 3687  | 1  | 9564   |
| 3687  | 1  | 1399   |
| 3687  | 1  | 1398   |
| 3687  | 1  | 1445   |
| 3682  | 1  | 5747   |
| 3682  | 1  | 9564   |
| 3682  | 1  | 1399   |
| 3682  | 1  | 1398   |
| 3682  | 1  | 1445   |
| 3681  | 1  | 5747   |
| 3681  | 1  | 9564   |
| 3681  | 1  | 1399   |
| 3681  | 1  | 1398   |
| 3681  | 1  | 1445   |
| 1445  | -1 | 6714   |
| 1445  | -1 | 4067   |
| 9459  | -1 | 9138   |
| 9459  | -1 | 23365  |
| 9459  | 1  | 5881   |
| 9459  | 1  | 5880   |
| 9459  | 1  | 5879   |
| 9459  | 1  | 28964  |
| 3645  | 1  | 2885   |
| 3645  | 1  | 8503   |
| 3645  | 1  | 5296   |
| 3645  | 1  | 5295   |
| 3645  | 1  | 5294   |
| 3645  | 1  | 5293   |
| 3645  | 1  | 5291   |
| 3645  | 1  | 5290   |
| 3645  | 1  | 23533  |
| 3645  | 1  | 6655   |
| 3645  | 1  | 6654   |
| 1730  | 1  | 5217   |

|        |   |        |
|--------|---|--------|
| 1730   | 1 | 5216   |
| 1730   | 1 | 375189 |
| 1730   | 1 | 345456 |
| 9138   | 1 | 387    |
| 80834  | 1 | 2778   |
| 80834  | 1 | 346562 |
| 5726   | 1 | 346562 |
| 54429  | 1 | 346562 |
| 50840  | 1 | 346562 |
| 50839  | 1 | 346562 |
| 50838  | 1 | 346562 |
| 50837  | 1 | 346562 |
| 50836  | 1 | 346562 |
| 50835  | 1 | 346562 |
| 50834  | 1 | 346562 |
| 50833  | 1 | 346562 |
| 50832  | 1 | 346562 |
| 50831  | 1 | 346562 |
| 353164 | 1 | 346562 |
| 338398 | 1 | 346562 |
| 259296 | 1 | 346562 |
| 259295 | 1 | 346562 |
| 259294 | 1 | 346562 |
| 259292 | 1 | 346562 |
| 259291 | 1 | 346562 |
| 259290 | 1 | 346562 |
| 259289 | 1 | 346562 |
| 259287 | 1 | 346562 |
| 259286 | 1 | 346562 |
| 259285 | 1 | 346562 |
| 51764  | 1 | 196883 |
| 51764  | 1 | 114    |
| 51764  | 1 | 112    |
| 51764  | 1 | 5330   |
| 2785   | 1 | 196883 |
| 2785   | 1 | 114    |
| 2785   | 1 | 112    |
| 2785   | 1 | 5330   |
| 2784   | 1 | 196883 |
| 2784   | 1 | 114    |
| 2784   | 1 | 112    |
| 2784   | 1 | 5330   |
| 2782   | 1 | 196883 |
| 2782   | 1 | 114    |
| 2782   | 1 | 112    |
| 2782   | 1 | 5330   |
| 80835  | 1 | 346562 |
| 346562 | 1 | 5136   |
| 83756  | 1 | 2778   |
| 83756  | 1 | 346562 |
| 8590   | 1 | 2774   |
| 8392   | 1 | 2774   |
| 8390   | 1 | 2774   |
| 8388   | 1 | 2774   |
| 8387   | 1 | 2774   |

|        |   |      |
|--------|---|------|
| 8386   | 1 | 2774 |
| 8385   | 1 | 2774 |
| 8383   | 1 | 2774 |
| 81797  | 1 | 2774 |
| 81697  | 1 | 2774 |
| 81696  | 1 | 2774 |
| 81472  | 1 | 2774 |
| 81470  | 1 | 2774 |
| 81469  | 1 | 2774 |
| 81448  | 1 | 2774 |
| 81442  | 1 | 2774 |
| 81399  | 1 | 2774 |
| 81392  | 1 | 2774 |
| 81328  | 1 | 2774 |
| 81327  | 1 | 2774 |
| 81318  | 1 | 2774 |
| 81309  | 1 | 2774 |
| 81300  | 1 | 2774 |
| 81285  | 1 | 2774 |
| 81282  | 1 | 2774 |
| 81168  | 1 | 2774 |
| 81127  | 1 | 2774 |
| 81099  | 1 | 2774 |
| 81061  | 1 | 2774 |
| 81050  | 1 | 2774 |
| 79544  | 1 | 2774 |
| 79541  | 1 | 2774 |
| 79501  | 1 | 2774 |
| 79473  | 1 | 2774 |
| 79345  | 1 | 2774 |
| 79339  | 1 | 2774 |
| 79324  | 1 | 2774 |
| 7932   | 1 | 2774 |
| 79317  | 1 | 2774 |
| 79310  | 1 | 2774 |
| 79295  | 1 | 2774 |
| 79290  | 1 | 2774 |
| 56656  | 1 | 2774 |
| 504189 | 1 | 2774 |
| 4995   | 1 | 2774 |
| 4994   | 1 | 2774 |
| 4993   | 1 | 2774 |
| 4992   | 1 | 2774 |
| 4991   | 1 | 2774 |
| 442361 | 1 | 2774 |
| 442194 | 1 | 2774 |
| 442191 | 1 | 2774 |
| 442186 | 1 | 2774 |
| 441933 | 1 | 2774 |
| 441911 | 1 | 2774 |
| 441670 | 1 | 2774 |
| 441669 | 1 | 2774 |
| 441639 | 1 | 2774 |
| 441608 | 1 | 2774 |
| 402317 | 1 | 2774 |

|        |   |      |
|--------|---|------|
| 402135 | 1 | 2774 |
| 401994 | 1 | 2774 |
| 401993 | 1 | 2774 |
| 401992 | 1 | 2774 |
| 401667 | 1 | 2774 |
| 401666 | 1 | 2774 |
| 401665 | 1 | 2774 |
| 401427 | 1 | 2774 |
| 393046 | 1 | 2774 |
| 392392 | 1 | 2774 |
| 392391 | 1 | 2774 |
| 392390 | 1 | 2774 |
| 392376 | 1 | 2774 |
| 392309 | 1 | 2774 |
| 392138 | 1 | 2774 |
| 391211 | 1 | 2774 |
| 391196 | 1 | 2774 |
| 391195 | 1 | 2774 |
| 391194 | 1 | 2774 |
| 391192 | 1 | 2774 |
| 391191 | 1 | 2774 |
| 391190 | 1 | 2774 |
| 391189 | 1 | 2774 |
| 391114 | 1 | 2774 |
| 391112 | 1 | 2774 |
| 391109 | 1 | 2774 |
| 391107 | 1 | 2774 |
| 390892 | 1 | 2774 |
| 390883 | 1 | 2774 |
| 390882 | 1 | 2774 |
| 390649 | 1 | 2774 |
| 390648 | 1 | 2774 |
| 390538 | 1 | 2774 |
| 390445 | 1 | 2774 |
| 390442 | 1 | 2774 |
| 390439 | 1 | 2774 |
| 390437 | 1 | 2774 |
| 390436 | 1 | 2774 |
| 390433 | 1 | 2774 |
| 390431 | 1 | 2774 |
| 390429 | 1 | 2774 |
| 390327 | 1 | 2774 |
| 390326 | 1 | 2774 |
| 390323 | 1 | 2774 |
| 390321 | 1 | 2774 |
| 390275 | 1 | 2774 |
| 390265 | 1 | 2774 |
| 390264 | 1 | 2774 |
| 390261 | 1 | 2774 |
| 390260 | 1 | 2774 |
| 390201 | 1 | 2774 |
| 390199 | 1 | 2774 |
| 390197 | 1 | 2774 |
| 390195 | 1 | 2774 |
| 390191 | 1 | 2774 |

|        |   |      |
|--------|---|------|
| 390181 | 1 | 2774 |
| 390174 | 1 | 2774 |
| 390168 | 1 | 2774 |
| 390167 | 1 | 2774 |
| 390162 | 1 | 2774 |
| 390157 | 1 | 2774 |
| 390155 | 1 | 2774 |
| 390154 | 1 | 2774 |
| 390152 | 1 | 2774 |
| 390151 | 1 | 2774 |
| 390144 | 1 | 2774 |
| 390142 | 1 | 2774 |
| 390113 | 1 | 2774 |
| 390093 | 1 | 2774 |
| 390084 | 1 | 2774 |
| 390083 | 1 | 2774 |
| 390081 | 1 | 2774 |
| 390079 | 1 | 2774 |
| 390078 | 1 | 2774 |
| 390077 | 1 | 2774 |
| 390075 | 1 | 2774 |
| 390072 | 1 | 2774 |
| 390067 | 1 | 2774 |
| 390066 | 1 | 2774 |
| 390064 | 1 | 2774 |
| 390063 | 1 | 2774 |
| 390061 | 1 | 2774 |
| 390059 | 1 | 2774 |
| 390058 | 1 | 2774 |
| 390054 | 1 | 2774 |
| 390038 | 1 | 2774 |
| 390037 | 1 | 2774 |
| 390036 | 1 | 2774 |
| 389090 | 1 | 2774 |
| 387748 | 1 | 2774 |
| 347468 | 1 | 2774 |
| 347169 | 1 | 2774 |
| 347168 | 1 | 2774 |
| 346528 | 1 | 2774 |
| 346525 | 1 | 2774 |
| 346517 | 1 | 2774 |
| 343563 | 1 | 2774 |
| 343406 | 1 | 2774 |
| 343173 | 1 | 2774 |
| 343172 | 1 | 2774 |
| 343171 | 1 | 2774 |
| 343169 | 1 | 2774 |
| 341799 | 1 | 2774 |
| 341568 | 1 | 2774 |
| 341418 | 1 | 2774 |
| 341416 | 1 | 2774 |
| 341276 | 1 | 2774 |
| 341152 | 1 | 2774 |
| 340980 | 1 | 2774 |
| 338755 | 1 | 2774 |

|        |   |      |
|--------|---|------|
| 338751 | 1 | 2774 |
| 338675 | 1 | 2774 |
| 338674 | 1 | 2774 |
| 338662 | 1 | 2774 |
| 286365 | 1 | 2774 |
| 286362 | 1 | 2774 |
| 285659 | 1 | 2774 |
| 284532 | 1 | 2774 |
| 284521 | 1 | 2774 |
| 284433 | 1 | 2774 |
| 284383 | 1 | 2774 |
| 283694 | 1 | 2774 |
| 283365 | 1 | 2774 |
| 283297 | 1 | 2774 |
| 283189 | 1 | 2774 |
| 283162 | 1 | 2774 |
| 283160 | 1 | 2774 |
| 283159 | 1 | 2774 |
| 283111 | 1 | 2774 |
| 283093 | 1 | 2774 |
| 283092 | 1 | 2774 |
| 282775 | 1 | 2774 |
| 282770 | 1 | 2774 |
| 282763 | 1 | 2774 |
| 26740  | 1 | 2774 |
| 26737  | 1 | 2774 |
| 26735  | 1 | 2774 |
| 26716  | 1 | 2774 |
| 26707  | 1 | 2774 |
| 26696  | 1 | 2774 |
| 26692  | 1 | 2774 |
| 26689  | 1 | 2774 |
| 26686  | 1 | 2774 |
| 26683  | 1 | 2774 |
| 26682  | 1 | 2774 |
| 26664  | 1 | 2774 |
| 26659  | 1 | 2774 |
| 26658  | 1 | 2774 |
| 26539  | 1 | 2774 |
| 26538  | 1 | 2774 |
| 26534  | 1 | 2774 |
| 26533  | 1 | 2774 |
| 26532  | 1 | 2774 |
| 26531  | 1 | 2774 |
| 26529  | 1 | 2774 |
| 26496  | 1 | 2774 |
| 26494  | 1 | 2774 |
| 26493  | 1 | 2774 |
| 26492  | 1 | 2774 |
| 26476  | 1 | 2774 |
| 26339  | 1 | 2774 |
| 26338  | 1 | 2774 |
| 26333  | 1 | 2774 |
| 26248  | 1 | 2774 |
| 26246  | 1 | 2774 |

|        |   |      |
|--------|---|------|
| 26245  | 1 | 2774 |
| 26219  | 1 | 2774 |
| 26212  | 1 | 2774 |
| 26211  | 1 | 2774 |
| 26189  | 1 | 2774 |
| 26188  | 1 | 2774 |
| 256892 | 1 | 2774 |
| 256148 | 1 | 2774 |
| 256144 | 1 | 2774 |
| 255725 | 1 | 2774 |
| 254973 | 1 | 2774 |
| 254879 | 1 | 2774 |
| 254786 | 1 | 2774 |
| 254783 | 1 | 2774 |
| 23538  | 1 | 2774 |
| 219986 | 1 | 2774 |
| 219983 | 1 | 2774 |
| 219982 | 1 | 2774 |
| 219981 | 1 | 2774 |
| 219968 | 1 | 2774 |
| 219965 | 1 | 2774 |
| 219960 | 1 | 2774 |
| 219959 | 1 | 2774 |
| 219958 | 1 | 2774 |
| 219957 | 1 | 2774 |
| 219956 | 1 | 2774 |
| 219954 | 1 | 2774 |
| 219952 | 1 | 2774 |
| 219875 | 1 | 2774 |
| 219874 | 1 | 2774 |
| 219873 | 1 | 2774 |
| 219870 | 1 | 2774 |
| 219869 | 1 | 2774 |
| 219865 | 1 | 2774 |
| 219858 | 1 | 2774 |
| 219493 | 1 | 2774 |
| 219487 | 1 | 2774 |
| 219484 | 1 | 2774 |
| 219482 | 1 | 2774 |
| 219479 | 1 | 2774 |
| 219477 | 1 | 2774 |
| 219473 | 1 | 2774 |
| 219469 | 1 | 2774 |
| 219464 | 1 | 2774 |
| 219453 | 1 | 2774 |
| 219447 | 1 | 2774 |
| 219438 | 1 | 2774 |
| 219437 | 1 | 2774 |
| 219436 | 1 | 2774 |
| 219432 | 1 | 2774 |
| 219431 | 1 | 2774 |
| 219429 | 1 | 2774 |
| 219428 | 1 | 2774 |
| 219417 | 1 | 2774 |
| 196335 | 1 | 2774 |

|        |   |      |
|--------|---|------|
| 162998 | 1 | 2774 |
| 158131 | 1 | 2774 |
| 150681 | 1 | 2774 |
| 144125 | 1 | 2774 |
| 144124 | 1 | 2774 |
| 143503 | 1 | 2774 |
| 143502 | 1 | 2774 |
| 143496 | 1 | 2774 |
| 138883 | 1 | 2774 |
| 138882 | 1 | 2774 |
| 138881 | 1 | 2774 |
| 138805 | 1 | 2774 |
| 138804 | 1 | 2774 |
| 138803 | 1 | 2774 |
| 138802 | 1 | 2774 |
| 138799 | 1 | 2774 |
| 135948 | 1 | 2774 |
| 135946 | 1 | 2774 |
| 135941 | 1 | 2774 |
| 135924 | 1 | 2774 |
| 134083 | 1 | 2774 |
| 130075 | 1 | 2774 |
| 128372 | 1 | 2774 |
| 128371 | 1 | 2774 |
| 128368 | 1 | 2774 |
| 128367 | 1 | 2774 |
| 128360 | 1 | 2774 |
| 127623 | 1 | 2774 |
| 127385 | 1 | 2774 |
| 127077 | 1 | 2774 |
| 127074 | 1 | 2774 |
| 127069 | 1 | 2774 |
| 127068 | 1 | 2774 |
| 127066 | 1 | 2774 |
| 127064 | 1 | 2774 |
| 127062 | 1 | 2774 |
| 127059 | 1 | 2774 |
| 126541 | 1 | 2774 |
| 126370 | 1 | 2774 |
| 125963 | 1 | 2774 |
| 125962 | 1 | 2774 |
| 125958 | 1 | 2774 |
| 124538 | 1 | 2774 |
| 122748 | 1 | 2774 |
| 122742 | 1 | 2774 |
| 122740 | 1 | 2774 |
| 121364 | 1 | 2774 |
| 121275 | 1 | 2774 |
| 121130 | 1 | 2774 |
| 120796 | 1 | 2774 |
| 120793 | 1 | 2774 |
| 120787 | 1 | 2774 |
| 120776 | 1 | 2774 |
| 120775 | 1 | 2774 |
| 120586 | 1 | 2774 |

|        |   |       |
|--------|---|-------|
| 120066 | 1 | 2774  |
| 120065 | 1 | 2774  |
| 119774 | 1 | 2774  |
| 119772 | 1 | 2774  |
| 119765 | 1 | 2774  |
| 119764 | 1 | 2774  |
| 119749 | 1 | 2774  |
| 119695 | 1 | 2774  |
| 119694 | 1 | 2774  |
| 119692 | 1 | 2774  |
| 119687 | 1 | 2774  |
| 119682 | 1 | 2774  |
| 119679 | 1 | 2774  |
| 119678 | 1 | 2774  |
| 10798  | 1 | 2774  |
| 1394   | 1 | 2781  |
| 1394   | 1 | 2778  |
| 1394   | 1 | 2775  |
| 1394   | 1 | 2773  |
| 1394   | 1 | 2771  |
| 1394   | 1 | 2770  |
| 1394   | 1 | 2768  |
| 1394   | 1 | 10672 |
| 1392   | 1 | 1394  |
| 2892   | 1 | 4067  |
| 2891   | 1 | 4067  |
| 4067   | 1 | 2207  |
| 4067   | 1 | 2206  |
| 4067   | 1 | 5582  |
| 4067   | 1 | 5579  |
| 4067   | 1 | 5578  |
| 2890   | 1 | 4067  |
| 2781   | 1 | 8681  |
| 2781   | 1 | 84647 |
| 2781   | 1 | 8399  |
| 2781   | 1 | 8398  |
| 2781   | 1 | 81579 |
| 2781   | 1 | 64600 |
| 2781   | 1 | 5322  |
| 2781   | 1 | 5321  |
| 2781   | 1 | 5320  |
| 2781   | 1 | 5319  |
| 2781   | 1 | 50487 |
| 2781   | 1 | 30814 |
| 2781   | 1 | 26279 |
| 2781   | 1 | 1E+08 |
| 2775   | 1 | 1857  |
| 2775   | 1 | 1856  |
| 2775   | 1 | 1855  |
| 2775   | 1 | 5332  |
| 2775   | 1 | 5331  |
| 2775   | 1 | 5330  |
| 2775   | 1 | 23236 |
| 2775   | 1 | 8681  |
| 2775   | 1 | 84647 |

|       |    |       |
|-------|----|-------|
| 2775  | 1  | 8399  |
| 2775  | 1  | 8398  |
| 2775  | 1  | 81579 |
| 2775  | 1  | 64600 |
| 2775  | 1  | 5322  |
| 2775  | 1  | 5321  |
| 2775  | 1  | 5320  |
| 2775  | 1  | 5319  |
| 2775  | 1  | 50487 |
| 2775  | 1  | 30814 |
| 2775  | 1  | 26279 |
| 2775  | 1  | 1E+08 |
| 10672 | 1  | 9138  |
| 10672 | 1  | 23365 |
| 10672 | 1  | 8681  |
| 10672 | 1  | 84647 |
| 10672 | 1  | 8399  |
| 10672 | 1  | 8398  |
| 10672 | 1  | 81579 |
| 10672 | 1  | 64600 |
| 10672 | 1  | 5322  |
| 10672 | 1  | 5321  |
| 10672 | 1  | 5320  |
| 10672 | 1  | 5319  |
| 10672 | 1  | 50487 |
| 10672 | 1  | 30814 |
| 10672 | 1  | 26279 |
| 10672 | 1  | 1E+08 |
| 5593  | 1  | 109   |
| 5593  | 1  | 10842 |
| 10842 | -1 | 5519  |
| 10842 | -1 | 5518  |
| 10842 | -1 | 5516  |
| 10842 | -1 | 5515  |
| 5592  | 1  | 109   |
| 5592  | 1  | 10842 |
| 814   | 1  | 2033  |
| 814   | 1  | 1387  |
| 818   | -1 | 109   |
| 818   | 1  | 2891  |
| 818   | 1  | 2890  |
| 818   | 1  | 2915  |
| 818   | 1  | 2911  |
| 817   | -1 | 109   |
| 817   | 1  | 2891  |
| 817   | 1  | 2890  |
| 817   | 1  | 2915  |
| 817   | 1  | 2911  |
| 816   | -1 | 109   |
| 816   | 1  | 2891  |
| 816   | 1  | 2890  |
| 816   | 1  | 2915  |
| 816   | 1  | 2911  |
| 815   | -1 | 109   |
| 815   | 1  | 2891  |

|      |    |        |
|------|----|--------|
| 815  | 1  | 2890   |
| 815  | 1  | 2915   |
| 815  | 1  | 2911   |
| 5616 | -1 | 2737   |
| 5616 | -1 | 2736   |
| 5616 | -1 | 2735   |
| 5616 | -1 | 572    |
| 5616 | -1 | 5350   |
| 5616 | -1 | 3745   |
| 5616 | 1  | 1080   |
| 5616 | 1  | 115    |
| 5616 | 1  | 109    |
| 5616 | 1  | 90993  |
| 5616 | 1  | 84699  |
| 5616 | 1  | 64764  |
| 5616 | 1  | 148327 |
| 5616 | 1  | 1385   |
| 5616 | 1  | 10488  |
| 5616 | 1  | 2033   |
| 5616 | 1  | 1387   |
| 5616 | 1  | 468    |
| 5616 | 1  | 3991   |
| 5616 | 1  | 5132   |
| 5616 | 1  | 5502   |
| 5616 | 1  | 2891   |
| 5616 | 1  | 2890   |
| 5616 | 1  | 5595   |
| 5616 | 1  | 5594   |
| 5613 | -1 | 2737   |
| 5613 | -1 | 2736   |
| 5613 | -1 | 2735   |
| 5613 | -1 | 572    |
| 5613 | -1 | 5350   |
| 5613 | -1 | 3745   |
| 5613 | 1  | 1080   |
| 5613 | 1  | 115    |
| 5613 | 1  | 109    |
| 5613 | 1  | 90993  |
| 5613 | 1  | 84699  |
| 5613 | 1  | 64764  |
| 5613 | 1  | 148327 |
| 5613 | 1  | 1385   |
| 5613 | 1  | 10488  |
| 5613 | 1  | 2033   |
| 5613 | 1  | 1387   |
| 5613 | 1  | 468    |
| 5613 | 1  | 3991   |
| 5613 | 1  | 5132   |
| 5613 | 1  | 5502   |
| 5613 | 1  | 2891   |
| 5613 | 1  | 2890   |
| 5613 | 1  | 5595   |
| 5613 | 1  | 5594   |
| 5568 | -1 | 2737   |
| 5568 | -1 | 2736   |

|      |    |        |
|------|----|--------|
| 5568 | -1 | 2735   |
| 5568 | -1 | 572    |
| 5568 | -1 | 5350   |
| 5568 | -1 | 3745   |
| 5568 | 1  | 1080   |
| 5568 | 1  | 115    |
| 5568 | 1  | 109    |
| 5568 | 1  | 90993  |
| 5568 | 1  | 84699  |
| 5568 | 1  | 64764  |
| 5568 | 1  | 148327 |
| 5568 | 1  | 1385   |
| 5568 | 1  | 10488  |
| 5568 | 1  | 2033   |
| 5568 | 1  | 1387   |
| 5568 | 1  | 468    |
| 5568 | 1  | 3991   |
| 5568 | 1  | 5132   |
| 5568 | 1  | 5502   |
| 5568 | 1  | 2891   |
| 5568 | 1  | 2890   |
| 5568 | 1  | 5595   |
| 5568 | 1  | 5594   |
| 5567 | -1 | 2737   |
| 5567 | -1 | 2736   |
| 5567 | -1 | 2735   |
| 5567 | -1 | 572    |
| 5567 | -1 | 5350   |
| 5567 | -1 | 3745   |
| 5567 | 1  | 1080   |
| 5567 | 1  | 115    |
| 5567 | 1  | 109    |
| 5567 | 1  | 90993  |
| 5567 | 1  | 84699  |
| 5567 | 1  | 64764  |
| 5567 | 1  | 148327 |
| 5567 | 1  | 1385   |
| 5567 | 1  | 10488  |
| 5567 | 1  | 2033   |
| 5567 | 1  | 1387   |
| 5567 | 1  | 468    |
| 5567 | 1  | 3991   |
| 5567 | 1  | 5132   |
| 5567 | 1  | 5502   |
| 5567 | 1  | 2891   |
| 5567 | 1  | 2890   |
| 5567 | 1  | 5595   |
| 5567 | 1  | 5594   |
| 5595 | -1 | 9475   |
| 5595 | -1 | 6093   |
| 5595 | -1 | 57369  |
| 5595 | -1 | 2697   |
| 5595 | -1 | 4093   |
| 5595 | -1 | 4090   |
| 5595 | -1 | 4086   |

|       |    |        |
|-------|----|--------|
| 5595  | -1 | 4088   |
| 5595  | -1 | 4087   |
| 5595  | -1 | 4089   |
| 5595  | -1 | 7249   |
| 5595  | 1  | 9252   |
| 5595  | 1  | 2113   |
| 5595  | 1  | 4286   |
| 5595  | 1  | 3725   |
| 5595  | 1  | 2353   |
| 5594  | -1 | 9475   |
| 5594  | -1 | 6093   |
| 5594  | -1 | 57369  |
| 5594  | -1 | 2697   |
| 5594  | -1 | 4093   |
| 5594  | -1 | 4090   |
| 5594  | -1 | 4086   |
| 5594  | -1 | 4088   |
| 5594  | -1 | 4087   |
| 5594  | -1 | 4089   |
| 5594  | -1 | 7249   |
| 5594  | 1  | 9252   |
| 5594  | 1  | 2113   |
| 5594  | 1  | 4286   |
| 5594  | 1  | 3725   |
| 5594  | 1  | 2353   |
| 5566  | -1 | 2737   |
| 5566  | -1 | 2736   |
| 5566  | -1 | 2735   |
| 5566  | -1 | 572    |
| 5566  | -1 | 5350   |
| 5566  | -1 | 3745   |
| 5566  | 1  | 1080   |
| 5566  | 1  | 115    |
| 5566  | 1  | 109    |
| 5566  | 1  | 90993  |
| 5566  | 1  | 84699  |
| 5566  | 1  | 64764  |
| 5566  | 1  | 148327 |
| 5566  | 1  | 1385   |
| 5566  | 1  | 10488  |
| 5566  | 1  | 2033   |
| 5566  | 1  | 1387   |
| 5566  | 1  | 468    |
| 5566  | 1  | 3991   |
| 5566  | 1  | 5132   |
| 5566  | 1  | 5502   |
| 5566  | 1  | 2891   |
| 5566  | 1  | 2890   |
| 5566  | 1  | 5595   |
| 5566  | 1  | 5594   |
| 7294  | 1  | 7410   |
| 7294  | 1  | 7409   |
| 7294  | 1  | 10451  |
| 11069 | 1  | 83593  |
| 11069 | 1  | 5908   |

|       |    |       |
|-------|----|-------|
| 11069 | 1  | 5906  |
| 10411 | 1  | 83593 |
| 10411 | 1  | 5908  |
| 10411 | 1  | 5906  |
| 83593 | 1  | 3684  |
| 83593 | 1  | 3689  |
| 83593 | 1  | 3683  |
| 83593 | 1  | 3676  |
| 83593 | 1  | 3688  |
| 9846  | 1  | 5781  |
| 9846  | 1  | 8503  |
| 9846  | 1  | 5296  |
| 9846  | 1  | 5295  |
| 9846  | 1  | 5294  |
| 9846  | 1  | 5293  |
| 9846  | 1  | 5291  |
| 9846  | 1  | 5290  |
| 9846  | 1  | 23533 |
| 5609  | 1  | 6885  |
| 930   | 1  | 7410  |
| 930   | 1  | 7409  |
| 930   | 1  | 10451 |
| 930   | 1  | 8503  |
| 930   | 1  | 5296  |
| 930   | 1  | 5295  |
| 930   | 1  | 5294  |
| 930   | 1  | 5293  |
| 930   | 1  | 5291  |
| 930   | 1  | 5290  |
| 930   | 1  | 23533 |
| 84433 | 1  | 8517  |
| 84433 | 1  | 1147  |
| 84433 | 1  | 3551  |
| 8915  | 1  | 8517  |
| 8915  | 1  | 1147  |
| 8915  | 1  | 3551  |
| 1147  | -1 | 8660  |
| 1147  | -1 | 8471  |
| 1147  | -1 | 3667  |
| 1147  | 1  | 4792  |
| 3551  | -1 | 8660  |
| 3551  | -1 | 8471  |
| 3551  | -1 | 3667  |
| 3551  | 1  | 4792  |
| 10892 | 1  | 8517  |
| 10892 | 1  | 1147  |
| 10892 | 1  | 3551  |
| 27040 | 1  | 5336  |
| 27040 | 1  | 5335  |
| 27040 | 1  | 2885  |
| 3937  | 1  | 7410  |
| 3937  | 1  | 7409  |
| 3937  | 1  | 10451 |
| 3937  | 1  | 5336  |
| 3937  | 1  | 5335  |

|       |   |        |
|-------|---|--------|
| 3937  | 1 | 2885   |
| 10870 | 1 | 2885   |
| 10870 | 1 | 8503   |
| 10870 | 1 | 5296   |
| 10870 | 1 | 5295   |
| 10870 | 1 | 5294   |
| 10870 | 1 | 5293   |
| 10870 | 1 | 5291   |
| 10870 | 1 | 5290   |
| 10870 | 1 | 23533  |
| 10870 | 1 | 5336   |
| 10870 | 1 | 5335   |
| 919   | 1 | 6850   |
| 919   | 1 | 7535   |
| 2207  | 1 | 6850   |
| 2207  | 1 | 7535   |
| 6850  | 1 | 7410   |
| 6850  | 1 | 7409   |
| 6850  | 1 | 10451  |
| 6850  | 1 | 5335   |
| 6850  | 1 | 27040  |
| 6850  | 1 | 3937   |
| 6850  | 1 | 9846   |
| 6850  | 1 | 6464   |
| 6850  | 1 | 53358  |
| 6850  | 1 | 399694 |
| 6850  | 1 | 25759  |
| 6850  | 1 | 8503   |
| 6850  | 1 | 5296   |
| 6850  | 1 | 5295   |
| 6850  | 1 | 5294   |
| 6850  | 1 | 5293   |
| 6850  | 1 | 5291   |
| 6850  | 1 | 5290   |
| 6850  | 1 | 23533  |
| 7535  | 1 | 6300   |
| 7535  | 1 | 5603   |
| 7535  | 1 | 5600   |
| 7535  | 1 | 1432   |
| 7535  | 1 | 27040  |
| 7535  | 1 | 3937   |
| 7535  | 1 | 6464   |
| 7535  | 1 | 53358  |
| 7535  | 1 | 399694 |
| 7535  | 1 | 25759  |
| 7535  | 1 | 8503   |
| 7535  | 1 | 5296   |
| 7535  | 1 | 5295   |
| 7535  | 1 | 5294   |
| 7535  | 1 | 5293   |
| 7535  | 1 | 5291   |
| 7535  | 1 | 5290   |
| 7535  | 1 | 23533  |
| 7305  | 1 | 6850   |
| 7305  | 1 | 7535   |

|      |    |       |
|------|----|-------|
| 4068 | 1  | 2534  |
| 2185 | 1  | 5881  |
| 2185 | 1  | 5880  |
| 2185 | 1  | 5879  |
| 5781 | -1 | 27040 |
| 5781 | -1 | 3937  |
| 5781 | -1 | 7410  |
| 5781 | -1 | 7409  |
| 5781 | -1 | 10451 |
| 5777 | -1 | 6850  |
| 5777 | -1 | 695   |
| 5777 | -1 | 919   |
| 5777 | -1 | 7535  |
| 5777 | -1 | 27040 |
| 5777 | -1 | 3937  |
| 5777 | -1 | 7410  |
| 5777 | -1 | 7409  |
| 5777 | -1 | 10451 |
| 5777 | -1 | 7297  |
| 5777 | -1 | 3718  |
| 5777 | -1 | 3717  |
| 5777 | -1 | 3716  |
| 5777 | -1 | 9180  |
| 5777 | -1 | 64109 |
| 5777 | -1 | 58985 |
| 5777 | -1 | 5618  |
| 5777 | -1 | 53833 |
| 5777 | -1 | 53832 |
| 5777 | -1 | 50615 |
| 5777 | -1 | 4352  |
| 5777 | -1 | 3977  |
| 5777 | -1 | 3953  |
| 5777 | -1 | 3601  |
| 5777 | -1 | 3598  |
| 5777 | -1 | 3597  |
| 5777 | -1 | 3595  |
| 5777 | -1 | 3594  |
| 5777 | -1 | 3590  |
| 5777 | -1 | 3588  |
| 5777 | -1 | 3587  |
| 5777 | -1 | 3581  |
| 5777 | -1 | 3575  |
| 5777 | -1 | 3572  |
| 5777 | -1 | 3570  |
| 5777 | -1 | 3568  |
| 5777 | -1 | 3566  |
| 5777 | -1 | 3563  |
| 5777 | -1 | 3561  |
| 5777 | -1 | 3560  |
| 5777 | -1 | 3559  |
| 5777 | -1 | 3460  |
| 5777 | -1 | 3459  |
| 5777 | -1 | 3455  |
| 5777 | -1 | 3454  |
| 5777 | -1 | 2690  |

|        |    |        |
|--------|----|--------|
| 5777   | -1 | 2057   |
| 5777   | -1 | 163702 |
| 5777   | -1 | 149233 |
| 5777   | -1 | 1441   |
| 5777   | -1 | 1439   |
| 5777   | -1 | 1438   |
| 5777   | -1 | 1271   |
| 5777   | -1 | 116379 |
| 5777   | 1  | 1500   |
| 3002   | 1  | 637    |
| 3002   | 1  | 836    |
| 51744  | 1  | 27040  |
| 51744  | 1  | 4068   |
| 51744  | 1  | 117157 |
| 962    | 1  | 51744  |
| 8027   | 1  | 7297   |
| 8027   | 1  | 3718   |
| 8027   | 1  | 3717   |
| 8027   | 1  | 3716   |
| 10254  | 1  | 7297   |
| 10254  | 1  | 3718   |
| 10254  | 1  | 3717   |
| 10254  | 1  | 3716   |
| 9641   | 1  | 3661   |
| 9641   | 1  | 3665   |
| 29110  | 1  | 3661   |
| 29110  | 1  | 3665   |
| 7187   | 1  | 9641   |
| 7187   | 1  | 29110  |
| 7098   | 1  | 148022 |
| 54106  | 1  | 4615   |
| 7100   | 1  | 4615   |
| 148022 | 1  | 8737   |
| 148022 | 1  | 7189   |
| 148022 | 1  | 7187   |
| 353376 | 1  | 148022 |
| 7189   | 1  | 3665   |
| 7189   | 1  | 3663   |
| 7189   | 1  | 6885   |
| 7099   | 1  | 353376 |
| 7099   | 1  | 4615   |
| 929    | 1  | 2768   |
| 929    | 1  | 10672  |
| 929    | 1  | 7099   |
| 114609 | 1  | 7189   |
| 7097   | 1  | 114609 |
| 7097   | 1  | 54472  |
| 7097   | 1  | 4615   |
| 7097   | 1  | 5879   |
| 57292  | 1  | 5781   |
| 57292  | 1  | 5777   |
| 3824   | 1  | 5781   |
| 3824   | 1  | 5777   |
| 3821   | 1  | 5781   |
| 3821   | 1  | 5777   |

|       |    |        |
|-------|----|--------|
| 3812  | 1  | 5781   |
| 3812  | 1  | 5777   |
| 3811  | 1  | 5781   |
| 3811  | 1  | 5777   |
| 3805  | 1  | 5781   |
| 3805  | 1  | 5777   |
| 3804  | 1  | 5781   |
| 3804  | 1  | 5777   |
| 3803  | 1  | 5781   |
| 3803  | 1  | 5777   |
| 3802  | 1  | 5781   |
| 3802  | 1  | 5777   |
| 1385  | -1 | 2033   |
| 1385  | -1 | 1387   |
| 4261  | 1  | 4802   |
| 4261  | 1  | 4801   |
| 4261  | 1  | 4800   |
| 4261  | 1  | 1385   |
| 4261  | 1  | 8625   |
| 4261  | 1  | 5994   |
| 4261  | 1  | 5993   |
| 5327  | 1  | 5340   |
| 3827  | 1  | 2161   |
| 3818  | 1  | 3827   |
| 3818  | 1  | 5340   |
| 2161  | 1  | 3818   |
| 2161  | 1  | 5340   |
| 5328  | 1  | 5340   |
| 5328  | 1  | 5329   |
| 5054  | -1 | 5328   |
| 5054  | -1 | 5327   |
| 5624  | -1 | 2147   |
| 5624  | -1 | 2157   |
| 5624  | -1 | 2153   |
| 5624  | 1  | 5054   |
| 7056  | 1  | 5624   |
| 2152  | 1  | 2159   |
| 2155  | 1  | 2159   |
| 2159  | 1  | 2147   |
| 2158  | 1  | 2159   |
| 2160  | 1  | 2158   |
| 1813  | 1  | 2773   |
| 1813  | 1  | 2771   |
| 1813  | 1  | 2770   |
| 10746 | 1  | 650832 |
| 10746 | 1  | 5608   |
| 10746 | 1  | 5606   |
| 10746 | 1  | 5607   |
| 1902  | 1  | 2773   |
| 1902  | 1  | 2771   |
| 1902  | 1  | 2770   |
| 5588  | 1  | 84433  |
| 5588  | 1  | 5602   |
| 5588  | 1  | 5601   |
| 5588  | 1  | 5599   |

|        |    |        |
|--------|----|--------|
| 5588   | 1  | 8517   |
| 5588   | 1  | 3551   |
| 5588   | 1  | 1147   |
| 5588   | 1  | 6885   |
| 5588   | 1  | 387    |
| 5588   | 1  | 71     |
| 5588   | 1  | 648921 |
| 5588   | 1  | 646821 |
| 5588   | 1  | 646048 |
| 5588   | 1  | 60     |
| 5583   | 1  | 387    |
| 5583   | 1  | 71     |
| 5583   | 1  | 648921 |
| 5583   | 1  | 646821 |
| 5583   | 1  | 646048 |
| 5583   | 1  | 60     |
| 5581   | -1 | 8660   |
| 5581   | -1 | 8471   |
| 5581   | -1 | 3667   |
| 5581   | 1  | 387    |
| 5581   | 1  | 71     |
| 5581   | 1  | 648921 |
| 5581   | 1  | 646821 |
| 5581   | 1  | 646048 |
| 5581   | 1  | 60     |
| 5580   | -1 | 8660   |
| 5580   | -1 | 8471   |
| 5580   | -1 | 3667   |
| 5580   | 1  | 5894   |
| 5580   | 1  | 387    |
| 5580   | 1  | 71     |
| 5580   | 1  | 648921 |
| 5580   | 1  | 646821 |
| 5580   | 1  | 646048 |
| 5580   | 1  | 60     |
| 9863   | 1  | 5728   |
| 5728   | -1 | 5747   |
| 5728   | -1 | 208    |
| 5728   | -1 | 207    |
| 5728   | -1 | 10000  |
| 260425 | 1  | 5728   |
| 1500   | 1  | 998    |
| 1500   | 1  | 5881   |
| 1500   | 1  | 5880   |
| 1500   | 1  | 5879   |
| 81607  | 1  | 56288  |
| 25945  | 1  | 56288  |
| 10458  | 1  | 10163  |
| 10458  | 1  | 55740  |
| 10458  | 1  | 71     |
| 10458  | 1  | 648921 |
| 10458  | 1  | 646821 |
| 10458  | 1  | 646048 |
| 10458  | 1  | 60     |
| 8936   | 1  | 81873  |

|       |    |        |
|-------|----|--------|
| 8936  | 1  | 653888 |
| 8936  | 1  | 10552  |
| 8936  | 1  | 10109  |
| 8936  | 1  | 10095  |
| 8936  | 1  | 10094  |
| 8936  | 1  | 10093  |
| 8936  | 1  | 10092  |
| 8936  | 1  | 71     |
| 8936  | 1  | 648921 |
| 8936  | 1  | 646821 |
| 8936  | 1  | 646048 |
| 8936  | 1  | 60     |
| 10810 | 1  | 71     |
| 10810 | 1  | 648921 |
| 10810 | 1  | 646821 |
| 10810 | 1  | 646048 |
| 10810 | 1  | 60     |
| 10163 | 1  | 81873  |
| 10163 | 1  | 653888 |
| 10163 | 1  | 10552  |
| 10163 | 1  | 10109  |
| 10163 | 1  | 10095  |
| 10163 | 1  | 10094  |
| 10163 | 1  | 10093  |
| 10163 | 1  | 10092  |
| 10163 | 1  | 71     |
| 10163 | 1  | 648921 |
| 10163 | 1  | 646821 |
| 10163 | 1  | 646048 |
| 10163 | 1  | 60     |
| 4301  | 1  | 71     |
| 4301  | 1  | 648921 |
| 4301  | 1  | 646821 |
| 4301  | 1  | 646048 |
| 4301  | 1  | 60     |
| 8826  | -1 | 1499   |
| 8826  | 1  | 71     |
| 8826  | 1  | 648921 |
| 8826  | 1  | 646821 |
| 8826  | 1  | 646048 |
| 8826  | 1  | 60     |
| 7454  | 1  | 81873  |
| 7454  | 1  | 653888 |
| 7454  | 1  | 10552  |
| 7454  | 1  | 10109  |
| 7454  | 1  | 10095  |
| 7454  | 1  | 10094  |
| 7454  | 1  | 10093  |
| 7454  | 1  | 10092  |
| 7454  | 1  | 71     |
| 7454  | 1  | 648921 |
| 7454  | 1  | 646821 |
| 7454  | 1  | 646048 |
| 7454  | 1  | 60     |
| 8976  | 1  | 81873  |

|      |   |        |
|------|---|--------|
| 8976 | 1 | 653888 |
| 8976 | 1 | 10552  |
| 8976 | 1 | 10109  |
| 8976 | 1 | 10095  |
| 8976 | 1 | 10094  |
| 8976 | 1 | 10093  |
| 8976 | 1 | 10092  |
| 8976 | 1 | 71     |
| 8976 | 1 | 648921 |
| 8976 | 1 | 646821 |
| 8976 | 1 | 646048 |
| 8976 | 1 | 60     |
| 5818 | 1 | 5818   |
| 5818 | 1 | 56288  |
| 5819 | 1 | 56288  |
| 5819 | 1 | 10666  |
| 5817 | 1 | 10666  |
| 3684 | 1 | 5747   |
| 3684 | 1 | 9564   |
| 3684 | 1 | 1399   |
| 3684 | 1 | 1398   |
| 3684 | 1 | 1445   |
| 3684 | 1 | 3383   |
| 3385 | 1 | 3683   |
| 3385 | 1 | 3689   |
| 3384 | 1 | 3683   |
| 3384 | 1 | 3689   |
| 3383 | 1 | 5336   |
| 3383 | 1 | 5335   |
| 3383 | 1 | 3683   |
| 3383 | 1 | 3689   |
| 3683 | 1 | 5747   |
| 3683 | 1 | 9564   |
| 3683 | 1 | 1399   |
| 3683 | 1 | 1398   |
| 3683 | 1 | 1445   |
| 3683 | 1 | 7410   |
| 3683 | 1 | 7409   |
| 3683 | 1 | 10451  |
| 3683 | 1 | 2185   |
| 3683 | 1 | 3385   |
| 3683 | 1 | 3384   |
| 3683 | 1 | 3383   |
| 3683 | 1 | 10666  |
| 3689 | 1 | 5747   |
| 3689 | 1 | 9564   |
| 3689 | 1 | 1399   |
| 3689 | 1 | 1398   |
| 3689 | 1 | 1445   |
| 3689 | 1 | 7410   |
| 3689 | 1 | 7409   |
| 3689 | 1 | 10451  |
| 3689 | 1 | 2185   |
| 3689 | 1 | 3385   |
| 3689 | 1 | 3384   |

|        |   |        |
|--------|---|--------|
| 3689   | 1 | 3383   |
| 3689   | 1 | 10666  |
| 29851  | 1 | 8503   |
| 29851  | 1 | 5296   |
| 29851  | 1 | 5295   |
| 29851  | 1 | 5294   |
| 29851  | 1 | 5293   |
| 29851  | 1 | 5291   |
| 29851  | 1 | 5290   |
| 29851  | 1 | 23533  |
| 29851  | 1 | 959    |
| 23308  | 1 | 29851  |
| 649853 | 1 | 8302   |
| 649853 | 1 | 57292  |
| 649853 | 1 | 3824   |
| 649853 | 1 | 3823   |
| 649853 | 1 | 3822   |
| 649853 | 1 | 3821   |
| 649853 | 1 | 3812   |
| 649853 | 1 | 3811   |
| 649853 | 1 | 3810   |
| 649853 | 1 | 3809   |
| 649853 | 1 | 3808   |
| 649853 | 1 | 3806   |
| 649853 | 1 | 3805   |
| 649853 | 1 | 3804   |
| 649853 | 1 | 3803   |
| 649853 | 1 | 3802   |
| 649853 | 1 | 115653 |
| 649853 | 1 | 926    |
| 649853 | 1 | 925    |
| 3135   | 1 | 8302   |
| 3135   | 1 | 57292  |
| 3135   | 1 | 3824   |
| 3135   | 1 | 3823   |
| 3135   | 1 | 3822   |
| 3135   | 1 | 3821   |
| 3135   | 1 | 3812   |
| 3135   | 1 | 3811   |
| 3135   | 1 | 3810   |
| 3135   | 1 | 3809   |
| 3135   | 1 | 3808   |
| 3135   | 1 | 3806   |
| 3135   | 1 | 3805   |
| 3135   | 1 | 3804   |
| 3135   | 1 | 3803   |
| 3135   | 1 | 3802   |
| 3135   | 1 | 115653 |
| 3135   | 1 | 926    |
| 3135   | 1 | 925    |
| 3134   | 1 | 8302   |
| 3134   | 1 | 57292  |
| 3134   | 1 | 3824   |
| 3134   | 1 | 3823   |
| 3134   | 1 | 3822   |

|      |   |        |
|------|---|--------|
| 3134 | 1 | 3821   |
| 3134 | 1 | 3812   |
| 3134 | 1 | 3811   |
| 3134 | 1 | 3810   |
| 3134 | 1 | 3809   |
| 3134 | 1 | 3808   |
| 3134 | 1 | 3806   |
| 3134 | 1 | 3805   |
| 3134 | 1 | 3804   |
| 3134 | 1 | 3803   |
| 3134 | 1 | 3802   |
| 3134 | 1 | 115653 |
| 3134 | 1 | 926    |
| 3134 | 1 | 925    |
| 3133 | 1 | 8302   |
| 3133 | 1 | 57292  |
| 3133 | 1 | 3824   |
| 3133 | 1 | 3823   |
| 3133 | 1 | 3822   |
| 3133 | 1 | 3821   |
| 3133 | 1 | 3812   |
| 3133 | 1 | 3811   |
| 3133 | 1 | 3810   |
| 3133 | 1 | 3809   |
| 3133 | 1 | 3808   |
| 3133 | 1 | 3806   |
| 3133 | 1 | 3805   |
| 3133 | 1 | 3804   |
| 3133 | 1 | 3803   |
| 3133 | 1 | 3802   |
| 3133 | 1 | 115653 |
| 3133 | 1 | 926    |
| 3133 | 1 | 925    |
| 3107 | 1 | 8302   |
| 3107 | 1 | 57292  |
| 3107 | 1 | 3824   |
| 3107 | 1 | 3823   |
| 3107 | 1 | 3822   |
| 3107 | 1 | 3821   |
| 3107 | 1 | 3812   |
| 3107 | 1 | 3811   |
| 3107 | 1 | 3810   |
| 3107 | 1 | 3809   |
| 3107 | 1 | 3808   |
| 3107 | 1 | 3806   |
| 3107 | 1 | 3805   |
| 3107 | 1 | 3804   |
| 3107 | 1 | 3803   |
| 3107 | 1 | 3802   |
| 3107 | 1 | 115653 |
| 3107 | 1 | 926    |
| 3107 | 1 | 925    |
| 3106 | 1 | 8302   |
| 3106 | 1 | 57292  |
| 3106 | 1 | 3824   |

|        |   |        |
|--------|---|--------|
| 3106   | 1 | 3823   |
| 3106   | 1 | 3822   |
| 3106   | 1 | 3821   |
| 3106   | 1 | 3812   |
| 3106   | 1 | 3811   |
| 3106   | 1 | 3810   |
| 3106   | 1 | 3809   |
| 3106   | 1 | 3808   |
| 3106   | 1 | 3806   |
| 3106   | 1 | 3805   |
| 3106   | 1 | 3804   |
| 3106   | 1 | 3803   |
| 3106   | 1 | 3802   |
| 3106   | 1 | 115653 |
| 3106   | 1 | 926    |
| 3106   | 1 | 925    |
| 3105   | 1 | 8302   |
| 3105   | 1 | 57292  |
| 3105   | 1 | 3824   |
| 3105   | 1 | 3823   |
| 3105   | 1 | 3822   |
| 3105   | 1 | 3821   |
| 3105   | 1 | 3812   |
| 3105   | 1 | 3811   |
| 3105   | 1 | 3810   |
| 3105   | 1 | 3809   |
| 3105   | 1 | 3808   |
| 3105   | 1 | 3806   |
| 3105   | 1 | 3805   |
| 3105   | 1 | 3804   |
| 3105   | 1 | 3803   |
| 3105   | 1 | 3802   |
| 3105   | 1 | 115653 |
| 3105   | 1 | 926    |
| 3105   | 1 | 925    |
| 942    | 1 | 1493   |
| 942    | 1 | 940    |
| 940    | 1 | 8503   |
| 940    | 1 | 5296   |
| 940    | 1 | 5295   |
| 940    | 1 | 5294   |
| 940    | 1 | 5293   |
| 940    | 1 | 5291   |
| 940    | 1 | 5290   |
| 940    | 1 | 23533  |
| 940    | 1 | 2885   |
| 940    | 1 | 941    |
| 941    | 1 | 1493   |
| 941    | 1 | 940    |
| 3339   | 1 | 1605   |
| 375790 | 1 | 1605   |
| 7450   | 1 | 2814   |
| 7450   | 1 | 2811   |
| 7450   | 1 | 2812   |
| 7450   | 1 | 2815   |

|      |   |       |
|------|---|-------|
| 7450 | 1 | 8516  |
| 7450 | 1 | 8515  |
| 7450 | 1 | 3685  |
| 7450 | 1 | 3680  |
| 7450 | 1 | 3679  |
| 7450 | 1 | 3678  |
| 7450 | 1 | 3676  |
| 7450 | 1 | 3675  |
| 7450 | 1 | 3674  |
| 7450 | 1 | 3673  |
| 7450 | 1 | 3672  |
| 7450 | 1 | 3655  |
| 7450 | 1 | 22801 |
| 7450 | 1 | 3696  |
| 7450 | 1 | 3695  |
| 7450 | 1 | 3694  |
| 7450 | 1 | 3693  |
| 7450 | 1 | 3691  |
| 7450 | 1 | 3690  |
| 7450 | 1 | 3688  |
| 7448 | 1 | 8516  |
| 7448 | 1 | 8515  |
| 7448 | 1 | 3685  |
| 7448 | 1 | 3680  |
| 7448 | 1 | 3679  |
| 7448 | 1 | 3678  |
| 7448 | 1 | 3676  |
| 7448 | 1 | 3675  |
| 7448 | 1 | 3674  |
| 7448 | 1 | 3673  |
| 7448 | 1 | 3672  |
| 7448 | 1 | 3655  |
| 7448 | 1 | 22801 |
| 7448 | 1 | 3696  |
| 7448 | 1 | 3695  |
| 7448 | 1 | 3694  |
| 7448 | 1 | 3693  |
| 7448 | 1 | 3691  |
| 7448 | 1 | 3690  |
| 7448 | 1 | 3688  |
| 7148 | 1 | 9672  |
| 7148 | 1 | 6385  |
| 7148 | 1 | 6383  |
| 7148 | 1 | 6382  |
| 7148 | 1 | 8516  |
| 7148 | 1 | 8515  |
| 7148 | 1 | 3685  |
| 7148 | 1 | 3680  |
| 7148 | 1 | 3679  |
| 7148 | 1 | 3678  |
| 7148 | 1 | 3676  |
| 7148 | 1 | 3675  |
| 7148 | 1 | 3674  |
| 7148 | 1 | 3673  |
| 7148 | 1 | 3672  |

|      |    |       |
|------|----|-------|
| 7148 | 1  | 3655  |
| 7148 | 1  | 22801 |
| 7148 | 1  | 3696  |
| 7148 | 1  | 3695  |
| 7148 | 1  | 3694  |
| 7148 | 1  | 3693  |
| 7148 | 1  | 3691  |
| 7148 | 1  | 3690  |
| 7148 | 1  | 3688  |
| 7143 | 1  | 9672  |
| 7143 | 1  | 6385  |
| 7143 | 1  | 6383  |
| 7143 | 1  | 6382  |
| 7143 | 1  | 8516  |
| 7143 | 1  | 8515  |
| 7143 | 1  | 3685  |
| 7143 | 1  | 3680  |
| 7143 | 1  | 3679  |
| 7143 | 1  | 3678  |
| 7143 | 1  | 3676  |
| 7143 | 1  | 3675  |
| 7143 | 1  | 3674  |
| 7143 | 1  | 3673  |
| 7143 | 1  | 3672  |
| 7143 | 1  | 3655  |
| 7143 | 1  | 22801 |
| 7143 | 1  | 3696  |
| 7143 | 1  | 3695  |
| 7143 | 1  | 3694  |
| 7143 | 1  | 3693  |
| 7143 | 1  | 3691  |
| 7143 | 1  | 3690  |
| 7143 | 1  | 3688  |
| 7060 | -1 | 4052  |
| 7060 | 1  | 961   |
| 7060 | 1  | 948   |
| 7060 | 1  | 9672  |
| 7060 | 1  | 6385  |
| 7060 | 1  | 6383  |
| 7060 | 1  | 6382  |
| 7060 | 1  | 8516  |
| 7060 | 1  | 8515  |
| 7060 | 1  | 3685  |
| 7060 | 1  | 3680  |
| 7060 | 1  | 3679  |
| 7060 | 1  | 3678  |
| 7060 | 1  | 3676  |
| 7060 | 1  | 3675  |
| 7060 | 1  | 3674  |
| 7060 | 1  | 3673  |
| 7060 | 1  | 3672  |
| 7060 | 1  | 3655  |
| 7060 | 1  | 22801 |
| 7060 | 1  | 3696  |
| 7060 | 1  | 3695  |

|      |    |       |
|------|----|-------|
| 7060 | 1  | 3694  |
| 7060 | 1  | 3693  |
| 7060 | 1  | 3691  |
| 7060 | 1  | 3690  |
| 7060 | 1  | 3688  |
| 7059 | -1 | 4052  |
| 7059 | 1  | 961   |
| 7059 | 1  | 948   |
| 7059 | 1  | 9672  |
| 7059 | 1  | 6385  |
| 7059 | 1  | 6383  |
| 7059 | 1  | 6382  |
| 7059 | 1  | 8516  |
| 7059 | 1  | 8515  |
| 7059 | 1  | 3685  |
| 7059 | 1  | 3680  |
| 7059 | 1  | 3679  |
| 7059 | 1  | 3678  |
| 7059 | 1  | 3676  |
| 7059 | 1  | 3675  |
| 7059 | 1  | 3674  |
| 7059 | 1  | 3673  |
| 7059 | 1  | 3672  |
| 7059 | 1  | 3655  |
| 7059 | 1  | 22801 |
| 7059 | 1  | 3696  |
| 7059 | 1  | 3695  |
| 7059 | 1  | 3694  |
| 7059 | 1  | 3693  |
| 7059 | 1  | 3691  |
| 7059 | 1  | 3690  |
| 7059 | 1  | 3688  |
| 7058 | -1 | 4052  |
| 7058 | 1  | 961   |
| 7058 | 1  | 948   |
| 7058 | 1  | 9672  |
| 7058 | 1  | 6385  |
| 7058 | 1  | 6383  |
| 7058 | 1  | 6382  |
| 7058 | 1  | 8516  |
| 7058 | 1  | 8515  |
| 7058 | 1  | 3685  |
| 7058 | 1  | 3680  |
| 7058 | 1  | 3679  |
| 7058 | 1  | 3678  |
| 7058 | 1  | 3676  |
| 7058 | 1  | 3675  |
| 7058 | 1  | 3674  |
| 7058 | 1  | 3673  |
| 7058 | 1  | 3672  |
| 7058 | 1  | 3655  |
| 7058 | 1  | 22801 |
| 7058 | 1  | 3696  |
| 7058 | 1  | 3695  |
| 7058 | 1  | 3694  |

|       |    |       |
|-------|----|-------|
| 7058  | 1  | 3693  |
| 7058  | 1  | 3691  |
| 7058  | 1  | 3690  |
| 7058  | 1  | 3688  |
| 7057  | -1 | 4052  |
| 7057  | 1  | 961   |
| 7057  | 1  | 948   |
| 7057  | 1  | 9672  |
| 7057  | 1  | 6385  |
| 7057  | 1  | 6383  |
| 7057  | 1  | 6382  |
| 7057  | 1  | 8516  |
| 7057  | 1  | 8515  |
| 7057  | 1  | 3685  |
| 7057  | 1  | 3680  |
| 7057  | 1  | 3679  |
| 7057  | 1  | 3678  |
| 7057  | 1  | 3676  |
| 7057  | 1  | 3675  |
| 7057  | 1  | 3674  |
| 7057  | 1  | 3673  |
| 7057  | 1  | 3672  |
| 7057  | 1  | 3655  |
| 7057  | 1  | 22801 |
| 7057  | 1  | 3696  |
| 7057  | 1  | 3695  |
| 7057  | 1  | 3694  |
| 7057  | 1  | 3693  |
| 7057  | 1  | 3691  |
| 7057  | 1  | 3690  |
| 7057  | 1  | 3688  |
| 6696  | 1  | 8516  |
| 6696  | 1  | 8515  |
| 6696  | 1  | 3685  |
| 6696  | 1  | 3680  |
| 6696  | 1  | 3679  |
| 6696  | 1  | 3678  |
| 6696  | 1  | 3676  |
| 6696  | 1  | 3675  |
| 6696  | 1  | 3674  |
| 6696  | 1  | 3673  |
| 6696  | 1  | 3672  |
| 6696  | 1  | 3655  |
| 6696  | 1  | 22801 |
| 6696  | 1  | 3696  |
| 6696  | 1  | 3695  |
| 6696  | 1  | 3694  |
| 6696  | 1  | 3693  |
| 6696  | 1  | 3691  |
| 6696  | 1  | 3690  |
| 6696  | 1  | 3688  |
| 63923 | 1  | 9672  |
| 63923 | 1  | 6385  |
| 63923 | 1  | 6383  |
| 63923 | 1  | 6382  |

|       |   |       |
|-------|---|-------|
| 63923 | 1 | 8516  |
| 63923 | 1 | 8515  |
| 63923 | 1 | 3685  |
| 63923 | 1 | 3680  |
| 63923 | 1 | 3679  |
| 63923 | 1 | 3678  |
| 63923 | 1 | 3676  |
| 63923 | 1 | 3675  |
| 63923 | 1 | 3674  |
| 63923 | 1 | 3673  |
| 63923 | 1 | 3672  |
| 63923 | 1 | 3655  |
| 63923 | 1 | 22801 |
| 63923 | 1 | 3696  |
| 63923 | 1 | 3695  |
| 63923 | 1 | 3694  |
| 63923 | 1 | 3693  |
| 63923 | 1 | 3691  |
| 63923 | 1 | 3690  |
| 63923 | 1 | 3688  |
| 5649  | 1 | 8516  |
| 5649  | 1 | 8515  |
| 5649  | 1 | 3685  |
| 5649  | 1 | 3680  |
| 5649  | 1 | 3679  |
| 5649  | 1 | 3678  |
| 5649  | 1 | 3676  |
| 5649  | 1 | 3675  |
| 5649  | 1 | 3674  |
| 5649  | 1 | 3673  |
| 5649  | 1 | 3672  |
| 5649  | 1 | 3655  |
| 5649  | 1 | 22801 |
| 5649  | 1 | 3696  |
| 5649  | 1 | 3695  |
| 5649  | 1 | 3694  |
| 5649  | 1 | 3693  |
| 5649  | 1 | 3691  |
| 5649  | 1 | 3690  |
| 5649  | 1 | 3688  |
| 50509 | 1 | 51206 |
| 50509 | 1 | 9672  |
| 50509 | 1 | 6385  |
| 50509 | 1 | 6383  |
| 50509 | 1 | 6382  |
| 50509 | 1 | 960   |
| 50509 | 1 | 8516  |
| 50509 | 1 | 8515  |
| 50509 | 1 | 3685  |
| 50509 | 1 | 3680  |
| 50509 | 1 | 3679  |
| 50509 | 1 | 3678  |
| 50509 | 1 | 3676  |
| 50509 | 1 | 3675  |
| 50509 | 1 | 3674  |

|       |   |       |
|-------|---|-------|
| 50509 | 1 | 3673  |
| 50509 | 1 | 3672  |
| 50509 | 1 | 3655  |
| 50509 | 1 | 22801 |
| 50509 | 1 | 3696  |
| 50509 | 1 | 3695  |
| 50509 | 1 | 3694  |
| 50509 | 1 | 3693  |
| 50509 | 1 | 3691  |
| 50509 | 1 | 3690  |
| 50509 | 1 | 3688  |
| 3918  | 1 | 1605  |
| 3918  | 1 | 9900  |
| 3918  | 1 | 9899  |
| 3918  | 1 | 22987 |
| 3918  | 1 | 960   |
| 3918  | 1 | 8516  |
| 3918  | 1 | 8515  |
| 3918  | 1 | 3685  |
| 3918  | 1 | 3680  |
| 3918  | 1 | 3679  |
| 3918  | 1 | 3678  |
| 3918  | 1 | 3676  |
| 3918  | 1 | 3675  |
| 3918  | 1 | 3674  |
| 3918  | 1 | 3673  |
| 3918  | 1 | 3672  |
| 3918  | 1 | 3655  |
| 3918  | 1 | 22801 |
| 3918  | 1 | 3696  |
| 3918  | 1 | 3695  |
| 3918  | 1 | 3694  |
| 3918  | 1 | 3693  |
| 3918  | 1 | 3691  |
| 3918  | 1 | 3690  |
| 3918  | 1 | 3688  |
| 3915  | 1 | 1605  |
| 3915  | 1 | 9900  |
| 3915  | 1 | 9899  |
| 3915  | 1 | 22987 |
| 3915  | 1 | 960   |
| 3915  | 1 | 8516  |
| 3915  | 1 | 8515  |
| 3915  | 1 | 3685  |
| 3915  | 1 | 3680  |
| 3915  | 1 | 3679  |
| 3915  | 1 | 3678  |
| 3915  | 1 | 3676  |
| 3915  | 1 | 3675  |
| 3915  | 1 | 3674  |
| 3915  | 1 | 3673  |
| 3915  | 1 | 3672  |
| 3915  | 1 | 3655  |
| 3915  | 1 | 22801 |
| 3915  | 1 | 3696  |

|      |   |       |
|------|---|-------|
| 3915 | 1 | 3695  |
| 3915 | 1 | 3694  |
| 3915 | 1 | 3693  |
| 3915 | 1 | 3691  |
| 3915 | 1 | 3690  |
| 3915 | 1 | 3688  |
| 3914 | 1 | 1605  |
| 3914 | 1 | 9900  |
| 3914 | 1 | 9899  |
| 3914 | 1 | 22987 |
| 3914 | 1 | 960   |
| 3914 | 1 | 8516  |
| 3914 | 1 | 8515  |
| 3914 | 1 | 3685  |
| 3914 | 1 | 3680  |
| 3914 | 1 | 3679  |
| 3914 | 1 | 3678  |
| 3914 | 1 | 3676  |
| 3914 | 1 | 3675  |
| 3914 | 1 | 3674  |
| 3914 | 1 | 3673  |
| 3914 | 1 | 3672  |
| 3914 | 1 | 3655  |
| 3914 | 1 | 22801 |
| 3914 | 1 | 3696  |
| 3914 | 1 | 3695  |
| 3914 | 1 | 3694  |
| 3914 | 1 | 3693  |
| 3914 | 1 | 3691  |
| 3914 | 1 | 3690  |
| 3914 | 1 | 3688  |
| 3913 | 1 | 1605  |
| 3913 | 1 | 9900  |
| 3913 | 1 | 9899  |
| 3913 | 1 | 22987 |
| 3913 | 1 | 960   |
| 3913 | 1 | 8516  |
| 3913 | 1 | 8515  |
| 3913 | 1 | 3685  |
| 3913 | 1 | 3680  |
| 3913 | 1 | 3679  |
| 3913 | 1 | 3678  |
| 3913 | 1 | 3676  |
| 3913 | 1 | 3675  |
| 3913 | 1 | 3674  |
| 3913 | 1 | 3673  |
| 3913 | 1 | 3672  |
| 3913 | 1 | 3655  |
| 3913 | 1 | 22801 |
| 3913 | 1 | 3696  |
| 3913 | 1 | 3695  |
| 3913 | 1 | 3694  |
| 3913 | 1 | 3693  |
| 3913 | 1 | 3691  |
| 3913 | 1 | 3690  |

|      |   |       |
|------|---|-------|
| 3913 | 1 | 3688  |
| 3912 | 1 | 1605  |
| 3912 | 1 | 9900  |
| 3912 | 1 | 9899  |
| 3912 | 1 | 22987 |
| 3912 | 1 | 960   |
| 3912 | 1 | 8516  |
| 3912 | 1 | 8515  |
| 3912 | 1 | 3685  |
| 3912 | 1 | 3680  |
| 3912 | 1 | 3679  |
| 3912 | 1 | 3678  |
| 3912 | 1 | 3676  |
| 3912 | 1 | 3675  |
| 3912 | 1 | 3674  |
| 3912 | 1 | 3673  |
| 3912 | 1 | 3672  |
| 3912 | 1 | 3655  |
| 3912 | 1 | 22801 |
| 3912 | 1 | 3696  |
| 3912 | 1 | 3695  |
| 3912 | 1 | 3694  |
| 3912 | 1 | 3693  |
| 3912 | 1 | 3691  |
| 3912 | 1 | 3690  |
| 3912 | 1 | 3688  |
| 3911 | 1 | 1605  |
| 3911 | 1 | 9900  |
| 3911 | 1 | 9899  |
| 3911 | 1 | 22987 |
| 3911 | 1 | 960   |
| 3911 | 1 | 8516  |
| 3911 | 1 | 8515  |
| 3911 | 1 | 3685  |
| 3911 | 1 | 3680  |
| 3911 | 1 | 3679  |
| 3911 | 1 | 3678  |
| 3911 | 1 | 3676  |
| 3911 | 1 | 3675  |
| 3911 | 1 | 3674  |
| 3911 | 1 | 3673  |
| 3911 | 1 | 3672  |
| 3911 | 1 | 3655  |
| 3911 | 1 | 22801 |
| 3911 | 1 | 3696  |
| 3911 | 1 | 3695  |
| 3911 | 1 | 3694  |
| 3911 | 1 | 3693  |
| 3911 | 1 | 3691  |
| 3911 | 1 | 3690  |
| 3911 | 1 | 3688  |
| 3910 | 1 | 1605  |
| 3910 | 1 | 9900  |
| 3910 | 1 | 9899  |
| 3910 | 1 | 22987 |

|      |   |       |
|------|---|-------|
| 3910 | 1 | 960   |
| 3910 | 1 | 8516  |
| 3910 | 1 | 8515  |
| 3910 | 1 | 3685  |
| 3910 | 1 | 3680  |
| 3910 | 1 | 3679  |
| 3910 | 1 | 3678  |
| 3910 | 1 | 3676  |
| 3910 | 1 | 3675  |
| 3910 | 1 | 3674  |
| 3910 | 1 | 3673  |
| 3910 | 1 | 3672  |
| 3910 | 1 | 3655  |
| 3910 | 1 | 22801 |
| 3910 | 1 | 3696  |
| 3910 | 1 | 3695  |
| 3910 | 1 | 3694  |
| 3910 | 1 | 3693  |
| 3910 | 1 | 3691  |
| 3910 | 1 | 3690  |
| 3910 | 1 | 3688  |
| 3909 | 1 | 1605  |
| 3909 | 1 | 9900  |
| 3909 | 1 | 9899  |
| 3909 | 1 | 22987 |
| 3909 | 1 | 960   |
| 3909 | 1 | 8516  |
| 3909 | 1 | 8515  |
| 3909 | 1 | 3685  |
| 3909 | 1 | 3680  |
| 3909 | 1 | 3679  |
| 3909 | 1 | 3678  |
| 3909 | 1 | 3676  |
| 3909 | 1 | 3675  |
| 3909 | 1 | 3674  |
| 3909 | 1 | 3673  |
| 3909 | 1 | 3672  |
| 3909 | 1 | 3655  |
| 3909 | 1 | 22801 |
| 3909 | 1 | 3696  |
| 3909 | 1 | 3695  |
| 3909 | 1 | 3694  |
| 3909 | 1 | 3693  |
| 3909 | 1 | 3691  |
| 3909 | 1 | 3690  |
| 3909 | 1 | 3688  |
| 3908 | 1 | 1605  |
| 3908 | 1 | 9900  |
| 3908 | 1 | 9899  |
| 3908 | 1 | 22987 |
| 3908 | 1 | 960   |
| 3908 | 1 | 8516  |
| 3908 | 1 | 8515  |
| 3908 | 1 | 3685  |
| 3908 | 1 | 3680  |

|      |   |       |
|------|---|-------|
| 3908 | 1 | 3679  |
| 3908 | 1 | 3678  |
| 3908 | 1 | 3676  |
| 3908 | 1 | 3675  |
| 3908 | 1 | 3674  |
| 3908 | 1 | 3673  |
| 3908 | 1 | 3672  |
| 3908 | 1 | 3655  |
| 3908 | 1 | 22801 |
| 3908 | 1 | 3696  |
| 3908 | 1 | 3695  |
| 3908 | 1 | 3694  |
| 3908 | 1 | 3693  |
| 3908 | 1 | 3691  |
| 3908 | 1 | 3690  |
| 3908 | 1 | 3688  |
| 3381 | 1 | 8516  |
| 3381 | 1 | 8515  |
| 3381 | 1 | 3685  |
| 3381 | 1 | 3680  |
| 3381 | 1 | 3679  |
| 3381 | 1 | 3678  |
| 3381 | 1 | 3676  |
| 3381 | 1 | 3675  |
| 3381 | 1 | 3674  |
| 3381 | 1 | 3673  |
| 3381 | 1 | 3672  |
| 3381 | 1 | 3655  |
| 3381 | 1 | 22801 |
| 3381 | 1 | 3696  |
| 3381 | 1 | 3695  |
| 3381 | 1 | 3694  |
| 3381 | 1 | 3693  |
| 3381 | 1 | 3691  |
| 3381 | 1 | 3690  |
| 3381 | 1 | 3688  |
| 3371 | 1 | 9672  |
| 3371 | 1 | 6385  |
| 3371 | 1 | 6383  |
| 3371 | 1 | 6382  |
| 3371 | 1 | 8516  |
| 3371 | 1 | 8515  |
| 3371 | 1 | 3685  |
| 3371 | 1 | 3680  |
| 3371 | 1 | 3679  |
| 3371 | 1 | 3678  |
| 3371 | 1 | 3676  |
| 3371 | 1 | 3675  |
| 3371 | 1 | 3674  |
| 3371 | 1 | 3673  |
| 3371 | 1 | 3672  |
| 3371 | 1 | 3655  |
| 3371 | 1 | 22801 |
| 3371 | 1 | 3696  |
| 3371 | 1 | 3695  |

|        |   |       |
|--------|---|-------|
| 3371   | 1 | 3694  |
| 3371   | 1 | 3693  |
| 3371   | 1 | 3691  |
| 3371   | 1 | 3690  |
| 3371   | 1 | 3688  |
| 284217 | 1 | 1605  |
| 284217 | 1 | 9900  |
| 284217 | 1 | 9899  |
| 284217 | 1 | 22987 |
| 284217 | 1 | 960   |
| 284217 | 1 | 8516  |
| 284217 | 1 | 8515  |
| 284217 | 1 | 3685  |
| 284217 | 1 | 3680  |
| 284217 | 1 | 3679  |
| 284217 | 1 | 3678  |
| 284217 | 1 | 3676  |
| 284217 | 1 | 3675  |
| 284217 | 1 | 3674  |
| 284217 | 1 | 3673  |
| 284217 | 1 | 3672  |
| 284217 | 1 | 3655  |
| 284217 | 1 | 22801 |
| 284217 | 1 | 3696  |
| 284217 | 1 | 3695  |
| 284217 | 1 | 3694  |
| 284217 | 1 | 3693  |
| 284217 | 1 | 3691  |
| 284217 | 1 | 3690  |
| 284217 | 1 | 3688  |
| 2335   | 1 | 9672  |
| 2335   | 1 | 6385  |
| 2335   | 1 | 6383  |
| 2335   | 1 | 6382  |
| 2335   | 1 | 960   |
| 2335   | 1 | 8516  |
| 2335   | 1 | 8515  |
| 2335   | 1 | 3685  |
| 2335   | 1 | 3680  |
| 2335   | 1 | 3679  |
| 2335   | 1 | 3678  |
| 2335   | 1 | 3676  |
| 2335   | 1 | 3675  |
| 2335   | 1 | 3674  |
| 2335   | 1 | 3673  |
| 2335   | 1 | 3672  |
| 2335   | 1 | 3655  |
| 2335   | 1 | 22801 |
| 2335   | 1 | 3696  |
| 2335   | 1 | 3695  |
| 2335   | 1 | 3694  |
| 2335   | 1 | 3693  |
| 2335   | 1 | 3691  |
| 2335   | 1 | 3690  |
| 2335   | 1 | 3688  |

|        |    |       |
|--------|----|-------|
| 22798  | 1  | 1605  |
| 22798  | 1  | 9900  |
| 22798  | 1  | 9899  |
| 22798  | 1  | 22987 |
| 22798  | 1  | 960   |
| 22798  | 1  | 8516  |
| 22798  | 1  | 8515  |
| 22798  | 1  | 3685  |
| 22798  | 1  | 3680  |
| 22798  | 1  | 3679  |
| 22798  | 1  | 3678  |
| 22798  | 1  | 3676  |
| 22798  | 1  | 3675  |
| 22798  | 1  | 3674  |
| 22798  | 1  | 3673  |
| 22798  | 1  | 3672  |
| 22798  | 1  | 3655  |
| 22798  | 1  | 22801 |
| 22798  | 1  | 3696  |
| 22798  | 1  | 3695  |
| 22798  | 1  | 3694  |
| 22798  | 1  | 3693  |
| 22798  | 1  | 3691  |
| 22798  | 1  | 3690  |
| 22798  | 1  | 3688  |
| 131873 | 1  | 51206 |
| 131873 | 1  | 9672  |
| 131873 | 1  | 6385  |
| 131873 | 1  | 6383  |
| 131873 | 1  | 6382  |
| 131873 | 1  | 960   |
| 131873 | 1  | 8516  |
| 131873 | 1  | 8515  |
| 131873 | 1  | 3685  |
| 131873 | 1  | 3680  |
| 131873 | 1  | 3679  |
| 131873 | 1  | 3678  |
| 131873 | 1  | 3676  |
| 131873 | 1  | 3675  |
| 131873 | 1  | 3674  |
| 131873 | 1  | 3673  |
| 131873 | 1  | 3672  |
| 131873 | 1  | 3655  |
| 131873 | 1  | 22801 |
| 131873 | 1  | 3696  |
| 131873 | 1  | 3695  |
| 131873 | 1  | 3694  |
| 131873 | 1  | 3693  |
| 131873 | 1  | 3691  |
| 131873 | 1  | 3690  |
| 131873 | 1  | 3688  |
| 1311   | -1 | 4052  |
| 1311   | 1  | 961   |
| 1311   | 1  | 948   |
| 1311   | 1  | 9672  |

|      |   |       |
|------|---|-------|
| 1311 | 1 | 6385  |
| 1311 | 1 | 6383  |
| 1311 | 1 | 6382  |
| 1311 | 1 | 8516  |
| 1311 | 1 | 8515  |
| 1311 | 1 | 3685  |
| 1311 | 1 | 3680  |
| 1311 | 1 | 3679  |
| 1311 | 1 | 3678  |
| 1311 | 1 | 3676  |
| 1311 | 1 | 3675  |
| 1311 | 1 | 3674  |
| 1311 | 1 | 3673  |
| 1311 | 1 | 3672  |
| 1311 | 1 | 3655  |
| 1311 | 1 | 22801 |
| 1311 | 1 | 3696  |
| 1311 | 1 | 3695  |
| 1311 | 1 | 3694  |
| 1311 | 1 | 3693  |
| 1311 | 1 | 3691  |
| 1311 | 1 | 3690  |
| 1311 | 1 | 3688  |
| 1302 | 1 | 51206 |
| 1302 | 1 | 9672  |
| 1302 | 1 | 6385  |
| 1302 | 1 | 6383  |
| 1302 | 1 | 6382  |
| 1302 | 1 | 960   |
| 1302 | 1 | 8516  |
| 1302 | 1 | 8515  |
| 1302 | 1 | 3685  |
| 1302 | 1 | 3680  |
| 1302 | 1 | 3679  |
| 1302 | 1 | 3678  |
| 1302 | 1 | 3676  |
| 1302 | 1 | 3675  |
| 1302 | 1 | 3674  |
| 1302 | 1 | 3673  |
| 1302 | 1 | 3672  |
| 1302 | 1 | 3655  |
| 1302 | 1 | 22801 |
| 1302 | 1 | 3696  |
| 1302 | 1 | 3695  |
| 1302 | 1 | 3694  |
| 1302 | 1 | 3693  |
| 1302 | 1 | 3691  |
| 1302 | 1 | 3690  |
| 1302 | 1 | 3688  |
| 1301 | 1 | 51206 |
| 1301 | 1 | 9672  |
| 1301 | 1 | 6385  |
| 1301 | 1 | 6383  |
| 1301 | 1 | 6382  |
| 1301 | 1 | 960   |

|      |   |       |
|------|---|-------|
| 1301 | 1 | 8516  |
| 1301 | 1 | 8515  |
| 1301 | 1 | 3685  |
| 1301 | 1 | 3680  |
| 1301 | 1 | 3679  |
| 1301 | 1 | 3678  |
| 1301 | 1 | 3676  |
| 1301 | 1 | 3675  |
| 1301 | 1 | 3674  |
| 1301 | 1 | 3673  |
| 1301 | 1 | 3672  |
| 1301 | 1 | 3655  |
| 1301 | 1 | 22801 |
| 1301 | 1 | 3696  |
| 1301 | 1 | 3695  |
| 1301 | 1 | 3694  |
| 1301 | 1 | 3693  |
| 1301 | 1 | 3691  |
| 1301 | 1 | 3690  |
| 1301 | 1 | 3688  |
| 1293 | 1 | 51206 |
| 1293 | 1 | 9672  |
| 1293 | 1 | 6385  |
| 1293 | 1 | 6383  |
| 1293 | 1 | 6382  |
| 1293 | 1 | 960   |
| 1293 | 1 | 8516  |
| 1293 | 1 | 8515  |
| 1293 | 1 | 3685  |
| 1293 | 1 | 3680  |
| 1293 | 1 | 3679  |
| 1293 | 1 | 3678  |
| 1293 | 1 | 3676  |
| 1293 | 1 | 3675  |
| 1293 | 1 | 3674  |
| 1293 | 1 | 3673  |
| 1293 | 1 | 3672  |
| 1293 | 1 | 3655  |
| 1293 | 1 | 22801 |
| 1293 | 1 | 3696  |
| 1293 | 1 | 3695  |
| 1293 | 1 | 3694  |
| 1293 | 1 | 3693  |
| 1293 | 1 | 3691  |
| 1293 | 1 | 3690  |
| 1293 | 1 | 3688  |
| 1292 | 1 | 51206 |
| 1292 | 1 | 9672  |
| 1292 | 1 | 6385  |
| 1292 | 1 | 6383  |
| 1292 | 1 | 6382  |
| 1292 | 1 | 960   |
| 1292 | 1 | 8516  |
| 1292 | 1 | 8515  |
| 1292 | 1 | 3685  |

|      |   |       |
|------|---|-------|
| 1292 | 1 | 3680  |
| 1292 | 1 | 3679  |
| 1292 | 1 | 3678  |
| 1292 | 1 | 3676  |
| 1292 | 1 | 3675  |
| 1292 | 1 | 3674  |
| 1292 | 1 | 3673  |
| 1292 | 1 | 3672  |
| 1292 | 1 | 3655  |
| 1292 | 1 | 22801 |
| 1292 | 1 | 3696  |
| 1292 | 1 | 3695  |
| 1292 | 1 | 3694  |
| 1292 | 1 | 3693  |
| 1292 | 1 | 3691  |
| 1292 | 1 | 3690  |
| 1292 | 1 | 3688  |
| 1291 | 1 | 51206 |
| 1291 | 1 | 9672  |
| 1291 | 1 | 6385  |
| 1291 | 1 | 6383  |
| 1291 | 1 | 6382  |
| 1291 | 1 | 960   |
| 1291 | 1 | 8516  |
| 1291 | 1 | 8515  |
| 1291 | 1 | 3685  |
| 1291 | 1 | 3680  |
| 1291 | 1 | 3679  |
| 1291 | 1 | 3678  |
| 1291 | 1 | 3676  |
| 1291 | 1 | 3675  |
| 1291 | 1 | 3674  |
| 1291 | 1 | 3673  |
| 1291 | 1 | 3672  |
| 1291 | 1 | 3655  |
| 1291 | 1 | 22801 |
| 1291 | 1 | 3696  |
| 1291 | 1 | 3695  |
| 1291 | 1 | 3694  |
| 1291 | 1 | 3693  |
| 1291 | 1 | 3691  |
| 1291 | 1 | 3690  |
| 1291 | 1 | 3688  |
| 1290 | 1 | 51206 |
| 1290 | 1 | 9672  |
| 1290 | 1 | 6385  |
| 1290 | 1 | 6383  |
| 1290 | 1 | 6382  |
| 1290 | 1 | 960   |
| 1290 | 1 | 8516  |
| 1290 | 1 | 8515  |
| 1290 | 1 | 3685  |
| 1290 | 1 | 3680  |
| 1290 | 1 | 3679  |
| 1290 | 1 | 3678  |

|      |   |       |
|------|---|-------|
| 1290 | 1 | 3676  |
| 1290 | 1 | 3675  |
| 1290 | 1 | 3674  |
| 1290 | 1 | 3673  |
| 1290 | 1 | 3672  |
| 1290 | 1 | 3655  |
| 1290 | 1 | 22801 |
| 1290 | 1 | 3696  |
| 1290 | 1 | 3695  |
| 1290 | 1 | 3694  |
| 1290 | 1 | 3693  |
| 1290 | 1 | 3691  |
| 1290 | 1 | 3690  |
| 1290 | 1 | 3688  |
| 1289 | 1 | 51206 |
| 1289 | 1 | 9672  |
| 1289 | 1 | 6385  |
| 1289 | 1 | 6383  |
| 1289 | 1 | 6382  |
| 1289 | 1 | 960   |
| 1289 | 1 | 8516  |
| 1289 | 1 | 8515  |
| 1289 | 1 | 3685  |
| 1289 | 1 | 3680  |
| 1289 | 1 | 3679  |
| 1289 | 1 | 3678  |
| 1289 | 1 | 3676  |
| 1289 | 1 | 3675  |
| 1289 | 1 | 3674  |
| 1289 | 1 | 3673  |
| 1289 | 1 | 3672  |
| 1289 | 1 | 3655  |
| 1289 | 1 | 22801 |
| 1289 | 1 | 3696  |
| 1289 | 1 | 3695  |
| 1289 | 1 | 3694  |
| 1289 | 1 | 3693  |
| 1289 | 1 | 3691  |
| 1289 | 1 | 3690  |
| 1289 | 1 | 3688  |
| 1288 | 1 | 51206 |
| 1288 | 1 | 9672  |
| 1288 | 1 | 6385  |
| 1288 | 1 | 6383  |
| 1288 | 1 | 6382  |
| 1288 | 1 | 960   |
| 1288 | 1 | 8516  |
| 1288 | 1 | 8515  |
| 1288 | 1 | 3685  |
| 1288 | 1 | 3680  |
| 1288 | 1 | 3679  |
| 1288 | 1 | 3678  |
| 1288 | 1 | 3676  |
| 1288 | 1 | 3675  |
| 1288 | 1 | 3674  |

|      |   |       |
|------|---|-------|
| 1288 | 1 | 3673  |
| 1288 | 1 | 3672  |
| 1288 | 1 | 3655  |
| 1288 | 1 | 22801 |
| 1288 | 1 | 3696  |
| 1288 | 1 | 3695  |
| 1288 | 1 | 3694  |
| 1288 | 1 | 3693  |
| 1288 | 1 | 3691  |
| 1288 | 1 | 3690  |
| 1288 | 1 | 3688  |
| 1286 | 1 | 51206 |
| 1286 | 1 | 9672  |
| 1286 | 1 | 6385  |
| 1286 | 1 | 6383  |
| 1286 | 1 | 6382  |
| 1286 | 1 | 960   |
| 1286 | 1 | 8516  |
| 1286 | 1 | 8515  |
| 1286 | 1 | 3685  |
| 1286 | 1 | 3680  |
| 1286 | 1 | 3679  |
| 1286 | 1 | 3678  |
| 1286 | 1 | 3676  |
| 1286 | 1 | 3675  |
| 1286 | 1 | 3674  |
| 1286 | 1 | 3673  |
| 1286 | 1 | 3672  |
| 1286 | 1 | 3655  |
| 1286 | 1 | 22801 |
| 1286 | 1 | 3696  |
| 1286 | 1 | 3695  |
| 1286 | 1 | 3694  |
| 1286 | 1 | 3693  |
| 1286 | 1 | 3691  |
| 1286 | 1 | 3690  |
| 1286 | 1 | 3688  |
| 1284 | 1 | 51206 |
| 1284 | 1 | 9672  |
| 1284 | 1 | 6385  |
| 1284 | 1 | 6383  |
| 1284 | 1 | 6382  |
| 1284 | 1 | 960   |
| 1284 | 1 | 8516  |
| 1284 | 1 | 8515  |
| 1284 | 1 | 3685  |
| 1284 | 1 | 3680  |
| 1284 | 1 | 3679  |
| 1284 | 1 | 3678  |
| 1284 | 1 | 3676  |
| 1284 | 1 | 3675  |
| 1284 | 1 | 3674  |
| 1284 | 1 | 3673  |
| 1284 | 1 | 3672  |
| 1284 | 1 | 3655  |

|      |   |       |
|------|---|-------|
| 1284 | 1 | 22801 |
| 1284 | 1 | 3696  |
| 1284 | 1 | 3695  |
| 1284 | 1 | 3694  |
| 1284 | 1 | 3693  |
| 1284 | 1 | 3691  |
| 1284 | 1 | 3690  |
| 1284 | 1 | 3688  |
| 1282 | 1 | 51206 |
| 1282 | 1 | 9672  |
| 1282 | 1 | 6385  |
| 1282 | 1 | 6383  |
| 1282 | 1 | 6382  |
| 1282 | 1 | 960   |
| 1282 | 1 | 8516  |
| 1282 | 1 | 8515  |
| 1282 | 1 | 3685  |
| 1282 | 1 | 3680  |
| 1282 | 1 | 3679  |
| 1282 | 1 | 3678  |
| 1282 | 1 | 3676  |
| 1282 | 1 | 3675  |
| 1282 | 1 | 3674  |
| 1282 | 1 | 3673  |
| 1282 | 1 | 3672  |
| 1282 | 1 | 3655  |
| 1282 | 1 | 22801 |
| 1282 | 1 | 3696  |
| 1282 | 1 | 3695  |
| 1282 | 1 | 3694  |
| 1282 | 1 | 3693  |
| 1282 | 1 | 3691  |
| 1282 | 1 | 3690  |
| 1282 | 1 | 3688  |
| 1281 | 1 | 51206 |
| 1281 | 1 | 9672  |
| 1281 | 1 | 6385  |
| 1281 | 1 | 6383  |
| 1281 | 1 | 6382  |
| 1281 | 1 | 960   |
| 1281 | 1 | 8516  |
| 1281 | 1 | 8515  |
| 1281 | 1 | 3685  |
| 1281 | 1 | 3680  |
| 1281 | 1 | 3679  |
| 1281 | 1 | 3678  |
| 1281 | 1 | 3676  |
| 1281 | 1 | 3675  |
| 1281 | 1 | 3674  |
| 1281 | 1 | 3673  |
| 1281 | 1 | 3672  |
| 1281 | 1 | 3655  |
| 1281 | 1 | 22801 |
| 1281 | 1 | 3696  |
| 1281 | 1 | 3695  |

|      |   |       |
|------|---|-------|
| 1281 | 1 | 3694  |
| 1281 | 1 | 3693  |
| 1281 | 1 | 3691  |
| 1281 | 1 | 3690  |
| 1281 | 1 | 3688  |
| 1280 | 1 | 51206 |
| 1280 | 1 | 9672  |
| 1280 | 1 | 6385  |
| 1280 | 1 | 6383  |
| 1280 | 1 | 6382  |
| 1280 | 1 | 960   |
| 1280 | 1 | 8516  |
| 1280 | 1 | 8515  |
| 1280 | 1 | 3685  |
| 1280 | 1 | 3680  |
| 1280 | 1 | 3679  |
| 1280 | 1 | 3678  |
| 1280 | 1 | 3676  |
| 1280 | 1 | 3675  |
| 1280 | 1 | 3674  |
| 1280 | 1 | 3673  |
| 1280 | 1 | 3672  |
| 1280 | 1 | 3655  |
| 1280 | 1 | 22801 |
| 1280 | 1 | 3696  |
| 1280 | 1 | 3695  |
| 1280 | 1 | 3694  |
| 1280 | 1 | 3693  |
| 1280 | 1 | 3691  |
| 1280 | 1 | 3690  |
| 1280 | 1 | 3688  |
| 1278 | 1 | 51206 |
| 1278 | 1 | 9672  |
| 1278 | 1 | 6385  |
| 1278 | 1 | 6383  |
| 1278 | 1 | 6382  |
| 1278 | 1 | 960   |
| 1278 | 1 | 8516  |
| 1278 | 1 | 8515  |
| 1278 | 1 | 3685  |
| 1278 | 1 | 3680  |
| 1278 | 1 | 3679  |
| 1278 | 1 | 3678  |
| 1278 | 1 | 3676  |
| 1278 | 1 | 3675  |
| 1278 | 1 | 3674  |
| 1278 | 1 | 3673  |
| 1278 | 1 | 3672  |
| 1278 | 1 | 3655  |
| 1278 | 1 | 22801 |
| 1278 | 1 | 3696  |
| 1278 | 1 | 3695  |
| 1278 | 1 | 3694  |
| 1278 | 1 | 3693  |
| 1278 | 1 | 3691  |

|      |   |       |
|------|---|-------|
| 1278 | 1 | 3690  |
| 1278 | 1 | 3688  |
| 1277 | 1 | 51206 |
| 1277 | 1 | 9672  |
| 1277 | 1 | 6385  |
| 1277 | 1 | 6383  |
| 1277 | 1 | 6382  |
| 1277 | 1 | 960   |
| 1277 | 1 | 8516  |
| 1277 | 1 | 8515  |
| 1277 | 1 | 3685  |
| 1277 | 1 | 3680  |
| 1277 | 1 | 3679  |
| 1277 | 1 | 3678  |
| 1277 | 1 | 3676  |
| 1277 | 1 | 3675  |
| 1277 | 1 | 3674  |
| 1277 | 1 | 3673  |
| 1277 | 1 | 3672  |
| 1277 | 1 | 3655  |
| 1277 | 1 | 22801 |
| 1277 | 1 | 3696  |
| 1277 | 1 | 3695  |
| 1277 | 1 | 3694  |
| 1277 | 1 | 3693  |
| 1277 | 1 | 3691  |
| 1277 | 1 | 3690  |
| 1277 | 1 | 3688  |
| 1101 | 1 | 8516  |
| 1101 | 1 | 8515  |
| 1101 | 1 | 3685  |
| 1101 | 1 | 3680  |
| 1101 | 1 | 3679  |
| 1101 | 1 | 3678  |
| 1101 | 1 | 3676  |
| 1101 | 1 | 3675  |
| 1101 | 1 | 3674  |
| 1101 | 1 | 3673  |
| 1101 | 1 | 3672  |
| 1101 | 1 | 3655  |
| 1101 | 1 | 22801 |
| 1101 | 1 | 3696  |
| 1101 | 1 | 3695  |
| 1101 | 1 | 3694  |
| 1101 | 1 | 3693  |
| 1101 | 1 | 3691  |
| 1101 | 1 | 3690  |
| 1101 | 1 | 3688  |
| 8516 | 1 | 5747  |
| 8516 | 1 | 9564  |
| 8516 | 1 | 1399  |
| 8516 | 1 | 1398  |
| 8516 | 1 | 1445  |
| 8515 | 1 | 5747  |
| 8515 | 1 | 9564  |

|      |   |      |
|------|---|------|
| 8515 | 1 | 1399 |
| 8515 | 1 | 1398 |
| 8515 | 1 | 1445 |
| 3685 | 1 | 5747 |
| 3685 | 1 | 9564 |
| 3685 | 1 | 1399 |
| 3685 | 1 | 1398 |
| 3685 | 1 | 1445 |
| 3680 | 1 | 5747 |
| 3680 | 1 | 9564 |
| 3680 | 1 | 1399 |
| 3680 | 1 | 1398 |
| 3680 | 1 | 1445 |
| 3680 | 1 | 7412 |
| 3679 | 1 | 5747 |
| 3679 | 1 | 9564 |
| 3679 | 1 | 1399 |
| 3679 | 1 | 1398 |
| 3679 | 1 | 1445 |
| 3678 | 1 | 5747 |
| 3678 | 1 | 9564 |
| 3678 | 1 | 1399 |
| 3678 | 1 | 1398 |
| 3678 | 1 | 1445 |
| 3676 | 1 | 5747 |
| 3676 | 1 | 9564 |
| 3676 | 1 | 1399 |
| 3676 | 1 | 1398 |
| 3676 | 1 | 1445 |
| 3676 | 1 | 7412 |
| 3675 | 1 | 5747 |
| 3675 | 1 | 9564 |
| 3675 | 1 | 1399 |
| 3675 | 1 | 1398 |
| 3675 | 1 | 1445 |
| 3674 | 1 | 5747 |
| 3674 | 1 | 9564 |
| 3674 | 1 | 1399 |
| 3674 | 1 | 1398 |
| 3674 | 1 | 1445 |
| 3673 | 1 | 5747 |
| 3673 | 1 | 9564 |
| 3673 | 1 | 1399 |
| 3673 | 1 | 1398 |
| 3673 | 1 | 1445 |
| 3672 | 1 | 5747 |
| 3672 | 1 | 9564 |
| 3672 | 1 | 1399 |
| 3672 | 1 | 1398 |
| 3672 | 1 | 1445 |
| 3655 | 1 | 5747 |
| 3655 | 1 | 9564 |
| 3655 | 1 | 1399 |
| 3655 | 1 | 1398 |
| 3655 | 1 | 1445 |

|       |   |       |
|-------|---|-------|
| 22801 | 1 | 5747  |
| 22801 | 1 | 9564  |
| 22801 | 1 | 1399  |
| 22801 | 1 | 1398  |
| 22801 | 1 | 1445  |
| 10319 | 1 | 1605  |
| 10319 | 1 | 9900  |
| 10319 | 1 | 9899  |
| 10319 | 1 | 22987 |
| 10319 | 1 | 960   |
| 10319 | 1 | 8516  |
| 10319 | 1 | 8515  |
| 10319 | 1 | 3685  |
| 10319 | 1 | 3680  |
| 10319 | 1 | 3679  |
| 10319 | 1 | 3678  |
| 10319 | 1 | 3676  |
| 10319 | 1 | 3675  |
| 10319 | 1 | 3674  |
| 10319 | 1 | 3673  |
| 10319 | 1 | 3672  |
| 10319 | 1 | 3655  |
| 10319 | 1 | 22801 |
| 10319 | 1 | 3696  |
| 10319 | 1 | 3695  |
| 10319 | 1 | 3694  |
| 10319 | 1 | 3693  |
| 10319 | 1 | 3691  |
| 10319 | 1 | 3690  |
| 10319 | 1 | 3688  |
| 80310 | 1 | 3645  |
| 80310 | 1 | 2263  |
| 80310 | 1 | 2260  |
| 80310 | 1 | 5159  |
| 80310 | 1 | 5156  |
| 80310 | 1 | 4233  |
| 80310 | 1 | 3791  |
| 80310 | 1 | 3480  |
| 80310 | 1 | 2324  |
| 80310 | 1 | 2321  |
| 80310 | 1 | 2064  |
| 80310 | 1 | 1956  |
| 5228  | 1 | 5159  |
| 5228  | 1 | 5156  |
| 5228  | 1 | 4233  |
| 5228  | 1 | 3791  |
| 5228  | 1 | 3480  |
| 5228  | 1 | 2324  |
| 5228  | 1 | 2321  |
| 5228  | 1 | 2064  |
| 5228  | 1 | 1956  |
| 3479  | 1 | 3645  |
| 3479  | 1 | 2263  |
| 3479  | 1 | 2260  |
| 3479  | 1 | 5159  |

|      |    |        |
|------|----|--------|
| 3479 | 1  | 5156   |
| 3479 | 1  | 4233   |
| 3479 | 1  | 3791   |
| 3479 | 1  | 3480   |
| 3479 | 1  | 2324   |
| 3479 | 1  | 2321   |
| 3479 | 1  | 2064   |
| 3479 | 1  | 1956   |
| 3480 | -1 | 1499   |
| 3480 | 1  | 4893   |
| 3480 | 1  | 3845   |
| 3480 | 1  | 3265   |
| 3480 | 1  | 2885   |
| 3480 | 1  | 5336   |
| 3480 | 1  | 5335   |
| 3480 | 1  | 2781   |
| 3480 | 1  | 2778   |
| 3480 | 1  | 2775   |
| 3480 | 1  | 2773   |
| 3480 | 1  | 2771   |
| 3480 | 1  | 2770   |
| 3480 | 1  | 2768   |
| 3480 | 1  | 10672  |
| 3480 | 1  | 6464   |
| 3480 | 1  | 53358  |
| 3480 | 1  | 399694 |
| 3480 | 1  | 25759  |
| 3480 | 1  | 8503   |
| 3480 | 1  | 5296   |
| 3480 | 1  | 5295   |
| 3480 | 1  | 5294   |
| 3480 | 1  | 5293   |
| 3480 | 1  | 5291   |
| 3480 | 1  | 5290   |
| 3480 | 1  | 23533  |
| 3480 | 1  | 5747   |
| 2889 | 1  | 23433  |
| 2889 | 1  | 5908   |
| 2889 | 1  | 5906   |
| 1793 | 1  | 5881   |
| 1793 | 1  | 5880   |
| 1793 | 1  | 5879   |
| 9564 | 1  | 1793   |
| 9564 | 1  | 1399   |
| 9564 | 1  | 1398   |
| 859  | 1  | 2534   |
| 858  | 1  | 2534   |
| 857  | 1  | 2534   |
| 7410 | 1  | 998    |
| 7410 | 1  | 387    |
| 7410 | 1  | 5881   |
| 7410 | 1  | 5880   |
| 7410 | 1  | 5879   |
| 7409 | 1  | 998    |
| 7409 | 1  | 387    |

|       |   |        |
|-------|---|--------|
| 7409  | 1 | 5881   |
| 7409  | 1 | 5880   |
| 7409  | 1 | 5879   |
| 10451 | 1 | 998    |
| 10451 | 1 | 387    |
| 10451 | 1 | 5881   |
| 10451 | 1 | 5880   |
| 10451 | 1 | 5879   |
| 3696  | 1 | 9564   |
| 3696  | 1 | 1399   |
| 3696  | 1 | 1398   |
| 3696  | 1 | 1445   |
| 3696  | 1 | 5747   |
| 3696  | 1 | 6714   |
| 3695  | 1 | 9564   |
| 3695  | 1 | 1399   |
| 3695  | 1 | 1398   |
| 3695  | 1 | 1445   |
| 3695  | 1 | 5747   |
| 3695  | 1 | 6714   |
| 3694  | 1 | 9564   |
| 3694  | 1 | 1399   |
| 3694  | 1 | 1398   |
| 3694  | 1 | 1445   |
| 3694  | 1 | 5747   |
| 3694  | 1 | 6714   |
| 3693  | 1 | 9564   |
| 3693  | 1 | 1399   |
| 3693  | 1 | 1398   |
| 3693  | 1 | 1445   |
| 3693  | 1 | 5747   |
| 3693  | 1 | 6714   |
| 3691  | 1 | 9564   |
| 3691  | 1 | 1399   |
| 3691  | 1 | 1398   |
| 3691  | 1 | 1445   |
| 3691  | 1 | 5747   |
| 3691  | 1 | 6714   |
| 3690  | 1 | 9564   |
| 3690  | 1 | 1399   |
| 3690  | 1 | 1398   |
| 3690  | 1 | 1445   |
| 3690  | 1 | 5747   |
| 3690  | 1 | 6714   |
| 93408 | 1 | 71     |
| 93408 | 1 | 648921 |
| 93408 | 1 | 646821 |
| 93408 | 1 | 646048 |
| 93408 | 1 | 60     |
| 58498 | 1 | 71     |
| 58498 | 1 | 648921 |
| 58498 | 1 | 646821 |
| 58498 | 1 | 646048 |
| 58498 | 1 | 60     |
| 4636  | 1 | 71     |

|        |    |        |
|--------|----|--------|
| 4636   | 1  | 648921 |
| 4636   | 1  | 646821 |
| 4636   | 1  | 646048 |
| 4636   | 1  | 60     |
| 4633   | 1  | 71     |
| 4633   | 1  | 648921 |
| 4633   | 1  | 646821 |
| 4633   | 1  | 646048 |
| 4633   | 1  | 60     |
| 29895  | 1  | 71     |
| 29895  | 1  | 648921 |
| 29895  | 1  | 646821 |
| 29895  | 1  | 646048 |
| 29895  | 1  | 60     |
| 10627  | 1  | 71     |
| 10627  | 1  | 648921 |
| 10627  | 1  | 646821 |
| 10627  | 1  | 646048 |
| 10627  | 1  | 60     |
| 10398  | 1  | 71     |
| 10398  | 1  | 648921 |
| 10398  | 1  | 646821 |
| 10398  | 1  | 646048 |
| 10398  | 1  | 60     |
| 103910 | 1  | 71     |
| 103910 | 1  | 648921 |
| 103910 | 1  | 646821 |
| 103910 | 1  | 646048 |
| 103910 | 1  | 60     |
| 23396  | -1 | 85477  |
| 23396  | -1 | 2934   |
| 1729   | 1  | 5217   |
| 1729   | 1  | 5216   |
| 1729   | 1  | 375189 |
| 1729   | 1  | 345456 |
| 9855   | 1  | 998    |
| 9855   | 1  | 387    |
| 5582   | 1  | 72     |
| 5582   | 1  | 70     |
| 5582   | 1  | 59     |
| 5582   | 1  | 58     |
| 5582   | 1  | 5336   |
| 5582   | 1  | 5335   |
| 5582   | 1  | 5747   |
| 5582   | 1  | 8877   |
| 5582   | 1  | 56848  |
| 5582   | 1  | 673    |
| 5582   | 1  | 369    |
| 5582   | 1  | 387    |
| 5582   | 1  | 71     |
| 5582   | 1  | 648921 |
| 5582   | 1  | 646821 |
| 5582   | 1  | 646048 |
| 5582   | 1  | 60     |
| 5579   | 1  | 72     |

|       |    |        |
|-------|----|--------|
| 5579  | 1  | 70     |
| 5579  | 1  | 59     |
| 5579  | 1  | 58     |
| 5579  | 1  | 5336   |
| 5579  | 1  | 5335   |
| 5579  | 1  | 7299   |
| 5579  | 1  | 5747   |
| 5579  | 1  | 8877   |
| 5579  | 1  | 56848  |
| 5579  | 1  | 673    |
| 5579  | 1  | 369    |
| 5579  | 1  | 387    |
| 5579  | 1  | 71     |
| 5579  | 1  | 648921 |
| 5579  | 1  | 646821 |
| 5579  | 1  | 646048 |
| 5579  | 1  | 60     |
| 5578  | 1  | 72     |
| 5578  | 1  | 70     |
| 5578  | 1  | 59     |
| 5578  | 1  | 58     |
| 5578  | 1  | 5336   |
| 5578  | 1  | 5335   |
| 5578  | 1  | 5747   |
| 5578  | 1  | 8877   |
| 5578  | 1  | 56848  |
| 5578  | 1  | 673    |
| 5578  | 1  | 369    |
| 5578  | 1  | 387    |
| 5578  | 1  | 71     |
| 5578  | 1  | 648921 |
| 5578  | 1  | 646821 |
| 5578  | 1  | 646048 |
| 5578  | 1  | 60     |
| 63928 | -1 | 5502   |
| 63928 | 1  | 572    |
| 5535  | -1 | 5502   |
| 5535  | 1  | 572    |
| 5534  | -1 | 5502   |
| 5534  | 1  | 572    |
| 5533  | -1 | 5502   |
| 5533  | 1  | 572    |
| 5532  | -1 | 5502   |
| 5532  | 1  | 572    |
| 5530  | -1 | 5502   |
| 5530  | 1  | 572    |
| 11261 | -1 | 5502   |
| 11261 | 1  | 572    |
| 1020  | 1  | 1808   |
| 64218 | 1  | 5365   |
| 64218 | 1  | 5364   |
| 64218 | 1  | 23654  |
| 57715 | 1  | 5365   |
| 57715 | 1  | 5364   |
| 57715 | 1  | 23654  |

|       |    |       |
|-------|----|-------|
| 54910 | 1  | 5365  |
| 54910 | 1  | 5364  |
| 54910 | 1  | 23654 |
| 10509 | 1  | 5365  |
| 10509 | 1  | 5364  |
| 10509 | 1  | 23654 |
| 10507 | 1  | 5365  |
| 10507 | 1  | 5364  |
| 10507 | 1  | 23654 |
| 10505 | 1  | 5365  |
| 10505 | 1  | 5364  |
| 10505 | 1  | 23654 |
| 3688  | 1  | 9564  |
| 3688  | 1  | 1399  |
| 3688  | 1  | 1398  |
| 3688  | 1  | 1445  |
| 3688  | 1  | 7412  |
| 3688  | 1  | 6714  |
| 8482  | 1  | 10154 |
| 8482  | 1  | 3688  |
| 5365  | -1 | 5881  |
| 5365  | -1 | 5880  |
| 5365  | -1 | 5879  |
| 5365  | 1  | 27289 |
| 5365  | 1  | 23365 |
| 5364  | -1 | 5881  |
| 5364  | -1 | 5880  |
| 5364  | -1 | 5879  |
| 5364  | 1  | 27289 |
| 5364  | 1  | 23365 |
| 23365 | 1  | 387   |
| 23654 | -1 | 5881  |
| 23654 | -1 | 5880  |
| 23654 | -1 | 5879  |
| 23654 | 1  | 27289 |
| 23654 | 1  | 23365 |
| 27289 | 1  | 23365 |
| 55558 | 1  | 27289 |
| 55558 | 1  | 5881  |
| 55558 | 1  | 5880  |
| 55558 | 1  | 5879  |
| 5362  | 1  | 27289 |
| 5362  | 1  | 5881  |
| 5362  | 1  | 5880  |
| 5362  | 1  | 5879  |
| 5361  | 1  | 27289 |
| 5361  | 1  | 5881  |
| 5361  | 1  | 5880  |
| 5361  | 1  | 5879  |
| 9901  | -1 | 998   |
| 57522 | -1 | 998   |
| 23380 | -1 | 998   |
| 9353  | 1  | 6091  |
| 9353  | 1  | 6092  |
| 6091  | 1  | 9901  |

|      |    |        |
|------|----|--------|
| 6091 | 1  | 57522  |
| 6091 | 1  | 23380  |
| 6092 | 1  | 9901   |
| 6092 | 1  | 57522  |
| 6092 | 1  | 23380  |
| 6585 | 1  | 6091   |
| 6585 | 1  | 6092   |
| 2773 | -1 | 196883 |
| 2773 | -1 | 115    |
| 2773 | -1 | 114    |
| 2773 | -1 | 113    |
| 2773 | -1 | 112    |
| 2773 | -1 | 111    |
| 2773 | -1 | 109    |
| 2773 | -1 | 108    |
| 2773 | -1 | 107    |
| 2773 | 1  | 5332   |
| 2773 | 1  | 5331   |
| 2773 | 1  | 5330   |
| 2773 | 1  | 23236  |
| 2773 | 1  | 8681   |
| 2773 | 1  | 84647  |
| 2773 | 1  | 8399   |
| 2773 | 1  | 8398   |
| 2773 | 1  | 81579  |
| 2773 | 1  | 64600  |
| 2773 | 1  | 5322   |
| 2773 | 1  | 5321   |
| 2773 | 1  | 5320   |
| 2773 | 1  | 5319   |
| 2773 | 1  | 50487  |
| 2773 | 1  | 30814  |
| 2773 | 1  | 26279  |
| 2773 | 1  | 1E+08  |
| 2773 | 1  | 8503   |
| 2773 | 1  | 5296   |
| 2773 | 1  | 5295   |
| 2773 | 1  | 5294   |
| 2773 | 1  | 5293   |
| 2773 | 1  | 5291   |
| 2773 | 1  | 5290   |
| 2773 | 1  | 23533  |
| 2773 | 1  | 4893   |
| 2773 | 1  | 3845   |
| 2773 | 1  | 3265   |
| 2771 | -1 | 196883 |
| 2771 | -1 | 115    |
| 2771 | -1 | 114    |
| 2771 | -1 | 113    |
| 2771 | -1 | 112    |
| 2771 | -1 | 111    |
| 2771 | -1 | 109    |
| 2771 | -1 | 108    |
| 2771 | -1 | 107    |
| 2771 | 1  | 5332   |

|      |    |        |
|------|----|--------|
| 2771 | 1  | 5331   |
| 2771 | 1  | 5330   |
| 2771 | 1  | 23236  |
| 2771 | 1  | 8681   |
| 2771 | 1  | 84647  |
| 2771 | 1  | 8399   |
| 2771 | 1  | 8398   |
| 2771 | 1  | 81579  |
| 2771 | 1  | 64600  |
| 2771 | 1  | 5322   |
| 2771 | 1  | 5321   |
| 2771 | 1  | 5320   |
| 2771 | 1  | 5319   |
| 2771 | 1  | 50487  |
| 2771 | 1  | 30814  |
| 2771 | 1  | 26279  |
| 2771 | 1  | 1E+08  |
| 2771 | 1  | 8503   |
| 2771 | 1  | 5296   |
| 2771 | 1  | 5295   |
| 2771 | 1  | 5294   |
| 2771 | 1  | 5293   |
| 2771 | 1  | 5291   |
| 2771 | 1  | 5290   |
| 2771 | 1  | 23533  |
| 2771 | 1  | 4893   |
| 2771 | 1  | 3845   |
| 2771 | 1  | 3265   |
| 2770 | -1 | 196883 |
| 2770 | -1 | 115    |
| 2770 | -1 | 114    |
| 2770 | -1 | 113    |
| 2770 | -1 | 112    |
| 2770 | -1 | 111    |
| 2770 | -1 | 109    |
| 2770 | -1 | 108    |
| 2770 | -1 | 107    |
| 2770 | 1  | 5332   |
| 2770 | 1  | 5331   |
| 2770 | 1  | 5330   |
| 2770 | 1  | 23236  |
| 2770 | 1  | 8681   |
| 2770 | 1  | 84647  |
| 2770 | 1  | 8399   |
| 2770 | 1  | 8398   |
| 2770 | 1  | 81579  |
| 2770 | 1  | 64600  |
| 2770 | 1  | 5322   |
| 2770 | 1  | 5321   |
| 2770 | 1  | 5320   |
| 2770 | 1  | 5319   |
| 2770 | 1  | 50487  |
| 2770 | 1  | 30814  |
| 2770 | 1  | 26279  |
| 2770 | 1  | 1E+08  |

|        |    |       |
|--------|----|-------|
| 2770   | 1  | 8503  |
| 2770   | 1  | 5296  |
| 2770   | 1  | 5295  |
| 2770   | 1  | 5294  |
| 2770   | 1  | 5293  |
| 2770   | 1  | 5291  |
| 2770   | 1  | 5290  |
| 2770   | 1  | 23533 |
| 2770   | 1  | 4893  |
| 2770   | 1  | 3845  |
| 2770   | 1  | 3265  |
| 25791  | -1 | 998   |
| 25791  | -1 | 5881  |
| 25791  | -1 | 5880  |
| 25791  | -1 | 5879  |
| 25791  | 1  | 387   |
| 2051   | 1  | 5921  |
| 2051   | 1  | 25    |
| 2051   | 1  | 1949  |
| 2051   | 1  | 1948  |
| 2051   | 1  | 1947  |
| 2050   | 1  | 5921  |
| 2050   | 1  | 25    |
| 2050   | 1  | 1949  |
| 2050   | 1  | 1948  |
| 2050   | 1  | 1947  |
| 2049   | 1  | 5921  |
| 2049   | 1  | 25    |
| 2049   | 1  | 1949  |
| 2049   | 1  | 1948  |
| 2049   | 1  | 1947  |
| 2048   | 1  | 5921  |
| 2048   | 1  | 25    |
| 2048   | 1  | 1949  |
| 2048   | 1  | 1948  |
| 2048   | 1  | 1947  |
| 2047   | 1  | 5921  |
| 2047   | 1  | 25    |
| 2047   | 1  | 1949  |
| 2047   | 1  | 1948  |
| 2047   | 1  | 1947  |
| 285220 | 1  | 5921  |
| 285220 | 1  | 25791 |
| 285220 | 1  | 25    |
| 2046   | 1  | 5921  |
| 2046   | 1  | 25791 |
| 2046   | 1  | 25    |
| 2045   | 1  | 5921  |
| 2045   | 1  | 25791 |
| 2045   | 1  | 25    |
| 2044   | 1  | 5921  |
| 2044   | 1  | 25791 |
| 2044   | 1  | 25    |
| 2043   | 1  | 5921  |
| 2043   | 1  | 25791 |

|      |    |        |
|------|----|--------|
| 2043 | 1  | 25     |
| 2042 | 1  | 5921   |
| 2042 | 1  | 25791  |
| 2042 | 1  | 25     |
| 2041 | 1  | 5921   |
| 2041 | 1  | 25791  |
| 2041 | 1  | 25     |
| 1969 | 1  | 5921   |
| 1969 | 1  | 25791  |
| 1969 | 1  | 25     |
| 5747 | 1  | 6464   |
| 5747 | 1  | 53358  |
| 5747 | 1  | 399694 |
| 5747 | 1  | 25759  |
| 5747 | 1  | 1793   |
| 5747 | 1  | 8503   |
| 5747 | 1  | 5296   |
| 5747 | 1  | 5295   |
| 5747 | 1  | 5294   |
| 5747 | 1  | 5293   |
| 5747 | 1  | 5291   |
| 5747 | 1  | 5290   |
| 5747 | 1  | 23533  |
| 1949 | 1  | 8440   |
| 1948 | 1  | 8440   |
| 1947 | 1  | 8440   |
| 2534 | -1 | 1500   |
| 2534 | -1 | 1499   |
| 2534 | 1  | 9846   |
| 2534 | 1  | 51744  |
| 2534 | 1  | 919    |
| 2534 | 1  | 2207   |
| 2534 | 1  | 7305   |
| 2534 | 1  | 6464   |
| 2534 | 1  | 53358  |
| 2534 | 1  | 399694 |
| 2534 | 1  | 25759  |
| 2534 | 1  | 55558  |
| 2534 | 1  | 5362   |
| 2534 | 1  | 5361   |
| 2534 | 1  | 1020   |
| 1946 | 1  | 285220 |
| 1946 | 1  | 2046   |
| 1946 | 1  | 2045   |
| 1946 | 1  | 2044   |
| 1946 | 1  | 2043   |
| 1946 | 1  | 2042   |
| 1946 | 1  | 2041   |
| 1946 | 1  | 1969   |
| 1946 | 1  | 2534   |
| 1946 | 1  | 5921   |
| 1945 | 1  | 285220 |
| 1945 | 1  | 2046   |
| 1945 | 1  | 2045   |
| 1945 | 1  | 2044   |

|      |    |        |
|------|----|--------|
| 1945 | 1  | 2043   |
| 1945 | 1  | 2042   |
| 1945 | 1  | 2041   |
| 1945 | 1  | 1969   |
| 1945 | 1  | 2534   |
| 1945 | 1  | 5921   |
| 1944 | 1  | 285220 |
| 1944 | 1  | 2046   |
| 1944 | 1  | 2045   |
| 1944 | 1  | 2044   |
| 1944 | 1  | 2043   |
| 1944 | 1  | 2042   |
| 1944 | 1  | 2041   |
| 1944 | 1  | 1969   |
| 1944 | 1  | 2534   |
| 1944 | 1  | 5921   |
| 1943 | 1  | 285220 |
| 1943 | 1  | 2046   |
| 1943 | 1  | 2045   |
| 1943 | 1  | 2044   |
| 1943 | 1  | 2043   |
| 1943 | 1  | 2042   |
| 1943 | 1  | 2041   |
| 1943 | 1  | 1969   |
| 1943 | 1  | 2534   |
| 1943 | 1  | 5921   |
| 5921 | -1 | 6237   |
| 5921 | -1 | 4893   |
| 5921 | -1 | 3845   |
| 5921 | -1 | 3265   |
| 5921 | -1 | 22808  |
| 5921 | -1 | 22800  |
| 1942 | 1  | 285220 |
| 1942 | 1  | 2046   |
| 1942 | 1  | 2045   |
| 1942 | 1  | 2044   |
| 1942 | 1  | 2043   |
| 1942 | 1  | 2042   |
| 1942 | 1  | 2041   |
| 1942 | 1  | 1969   |
| 1942 | 1  | 2534   |
| 1942 | 1  | 5921   |
| 1630 | -1 | 387    |
| 1630 | 1  | 4690   |
| 9423 | 1  | 90249  |
| 9423 | 1  | 8633   |
| 9423 | 1  | 219699 |
| 9423 | 1  | 137970 |
| 9423 | 1  | 1630   |
| 5519 | -1 | 83700  |
| 5519 | -1 | 58494  |
| 5519 | -1 | 50848  |
| 5519 | -1 | 150084 |
| 5519 | -1 | 5590   |
| 5519 | -1 | 5584   |

|      |    |        |
|------|----|--------|
| 5519 | -1 | 5582   |
| 5519 | -1 | 5579   |
| 5519 | -1 | 5578   |
| 5519 | -1 | 5595   |
| 5519 | -1 | 5594   |
| 5519 | -1 | 5605   |
| 5519 | -1 | 5604   |
| 5518 | -1 | 83700  |
| 5518 | -1 | 58494  |
| 5518 | -1 | 50848  |
| 5518 | -1 | 150084 |
| 5518 | -1 | 5590   |
| 5518 | -1 | 5584   |
| 5518 | -1 | 5582   |
| 5518 | -1 | 5579   |
| 5518 | -1 | 5578   |
| 5518 | -1 | 5595   |
| 5518 | -1 | 5594   |
| 5518 | -1 | 5605   |
| 5518 | -1 | 5604   |
| 5516 | -1 | 83700  |
| 5516 | -1 | 58494  |
| 5516 | -1 | 50848  |
| 5516 | -1 | 150084 |
| 5516 | -1 | 5590   |
| 5516 | -1 | 5584   |
| 5516 | -1 | 5582   |
| 5516 | -1 | 5579   |
| 5516 | -1 | 5578   |
| 5516 | -1 | 5595   |
| 5516 | -1 | 5594   |
| 5516 | -1 | 5605   |
| 5516 | -1 | 5604   |
| 5515 | -1 | 83700  |
| 5515 | -1 | 58494  |
| 5515 | -1 | 50848  |
| 5515 | -1 | 150084 |
| 5515 | -1 | 5590   |
| 5515 | -1 | 5584   |
| 5515 | -1 | 5582   |
| 5515 | -1 | 5579   |
| 5515 | -1 | 5578   |
| 5515 | -1 | 5595   |
| 5515 | -1 | 5594   |
| 5515 | -1 | 5605   |
| 5515 | -1 | 5604   |
| 4088 | 1  | 2033   |
| 4088 | 1  | 1387   |
| 4088 | 1  | 6667   |
| 4088 | 1  | 5934   |
| 4088 | 1  | 5933   |
| 4088 | 1  | 1875   |
| 4088 | 1  | 1874   |
| 4088 | 1  | 7027   |
| 4088 | 1  | 4089   |

|        |    |       |
|--------|----|-------|
| 4087   | 1  | 2033  |
| 4087   | 1  | 1387  |
| 4087   | 1  | 6667  |
| 4087   | 1  | 5934  |
| 4087   | 1  | 5933  |
| 4087   | 1  | 1875  |
| 4087   | 1  | 1874  |
| 4087   | 1  | 7027  |
| 4087   | 1  | 4089  |
| 4093   | 1  | 4089  |
| 4090   | 1  | 4089  |
| 4086   | 1  | 4089  |
| 4838   | 1  | 93    |
| 4838   | 1  | 92    |
| 656    | 1  | 659   |
| 656    | 1  | 269   |
| 654    | 1  | 659   |
| 654    | 1  | 269   |
| 653    | 1  | 659   |
| 653    | 1  | 269   |
| 652    | 1  | 659   |
| 652    | 1  | 269   |
| 392255 | 1  | 659   |
| 392255 | 1  | 269   |
| 353500 | 1  | 659   |
| 353500 | 1  | 269   |
| 151449 | 1  | 659   |
| 151449 | 1  | 269   |
| 9794   | 1  | 3516  |
| 9794   | 1  | 11317 |
| 84441  | 1  | 3516  |
| 84441  | 1  | 11317 |
| 55534  | 1  | 3516  |
| 55534  | 1  | 11317 |
| 8850   | 1  | 3516  |
| 8850   | 1  | 11317 |
| 2648   | 1  | 3516  |
| 2648   | 1  | 11317 |
| 5986   | 1  | 4855  |
| 5986   | 1  | 4854  |
| 5986   | 1  | 4853  |
| 5986   | 1  | 4851  |
| 4242   | 1  | 4855  |
| 4242   | 1  | 4854  |
| 4242   | 1  | 4853  |
| 4242   | 1  | 4851  |
| 3955   | 1  | 4855  |
| 3955   | 1  | 4854  |
| 3955   | 1  | 4853  |
| 3955   | 1  | 4851  |
| 55851  | 1  | 4855  |
| 55851  | 1  | 4854  |
| 55851  | 1  | 4853  |
| 55851  | 1  | 4851  |
| 5664   | -1 | 22926 |

|       |    |        |
|-------|----|--------|
| 5664  | -1 | 2081   |
| 5664  | -1 | 9451   |
| 5664  | 1  | 4855   |
| 5664  | 1  | 4854   |
| 5664  | 1  | 4853   |
| 5664  | 1  | 4851   |
| 51107 | 1  | 4855   |
| 51107 | 1  | 4854   |
| 51107 | 1  | 4853   |
| 51107 | 1  | 4851   |
| 23385 | 1  | 4855   |
| 23385 | 1  | 4854   |
| 23385 | 1  | 4853   |
| 23385 | 1  | 4851   |
| 6868  | 1  | 1839   |
| 6868  | 1  | 4855   |
| 6868  | 1  | 4854   |
| 6868  | 1  | 4853   |
| 6868  | 1  | 4851   |
| 54567 | 1  | 4855   |
| 54567 | 1  | 4854   |
| 54567 | 1  | 4853   |
| 54567 | 1  | 4851   |
| 28514 | 1  | 4855   |
| 28514 | 1  | 4854   |
| 28514 | 1  | 4853   |
| 28514 | 1  | 4851   |
| 4855  | 1  | 3516   |
| 4855  | 1  | 11317  |
| 4855  | 1  | 23220  |
| 4855  | 1  | 196403 |
| 4855  | 1  | 1840   |
| 4855  | 1  | 151636 |
| 4855  | 1  | 113878 |
| 4854  | 1  | 3516   |
| 4854  | 1  | 11317  |
| 4854  | 1  | 23220  |
| 4854  | 1  | 196403 |
| 4854  | 1  | 1840   |
| 4854  | 1  | 151636 |
| 4854  | 1  | 113878 |
| 4853  | 1  | 3516   |
| 4853  | 1  | 11317  |
| 4853  | 1  | 23220  |
| 4853  | 1  | 196403 |
| 4853  | 1  | 1840   |
| 4853  | 1  | 151636 |
| 4853  | 1  | 113878 |
| 4851  | 1  | 3516   |
| 4851  | 1  | 11317  |
| 4851  | 1  | 23220  |
| 4851  | 1  | 196403 |
| 4851  | 1  | 1840   |
| 4851  | 1  | 151636 |
| 4851  | 1  | 113878 |

|       |    |        |
|-------|----|--------|
| 10683 | 1  | 4855   |
| 10683 | 1  | 4854   |
| 10683 | 1  | 4853   |
| 10683 | 1  | 4851   |
| 5602  | -1 | 8660   |
| 5602  | -1 | 8471   |
| 5602  | -1 | 3667   |
| 5602  | -1 | 4776   |
| 5602  | -1 | 4773   |
| 5601  | -1 | 8660   |
| 5601  | -1 | 8471   |
| 5601  | -1 | 3667   |
| 5601  | -1 | 4776   |
| 5601  | -1 | 4773   |
| 5601  | 1  | 2353   |
| 5599  | -1 | 8660   |
| 5599  | -1 | 8471   |
| 5599  | -1 | 3667   |
| 5599  | -1 | 4776   |
| 5599  | -1 | 4773   |
| 9475  | -1 | 5501   |
| 9475  | -1 | 5500   |
| 9475  | -1 | 5499   |
| 9475  | -1 | 4659   |
| 6093  | -1 | 5501   |
| 6093  | -1 | 5500   |
| 6093  | -1 | 5499   |
| 6093  | -1 | 4659   |
| 387   | -1 | 5881   |
| 387   | -1 | 5880   |
| 387   | -1 | 5879   |
| 387   | 1  | 1730   |
| 387   | 1  | 71     |
| 387   | 1  | 648921 |
| 387   | 1  | 646821 |
| 387   | 1  | 646048 |
| 387   | 1  | 60     |
| 387   | 1  | 23396  |
| 387   | 1  | 1729   |
| 387   | 1  | 9475   |
| 387   | 1  | 6093   |
| 85409 | 1  | 1857   |
| 85409 | 1  | 1856   |
| 85409 | 1  | 1855   |
| 1857  | -1 | 4855   |
| 1857  | -1 | 4854   |
| 1857  | -1 | 4853   |
| 1857  | -1 | 4851   |
| 1857  | -1 | 2932   |
| 1856  | -1 | 4855   |
| 1856  | -1 | 4854   |
| 1856  | -1 | 4853   |
| 1856  | -1 | 4851   |
| 1856  | -1 | 2932   |
| 1855  | -1 | 4855   |

|       |    |       |
|-------|----|-------|
| 1855  | -1 | 4854  |
| 1855  | -1 | 4853  |
| 1855  | -1 | 4851  |
| 1855  | -1 | 2932  |
| 85407 | 1  | 1857  |
| 85407 | 1  | 1856  |
| 85407 | 1  | 1855  |
| 4089  | 1  | 2033  |
| 4089  | 1  | 1387  |
| 4089  | 1  | 6667  |
| 4089  | 1  | 5934  |
| 4089  | 1  | 5933  |
| 4089  | 1  | 1875  |
| 4089  | 1  | 1874  |
| 4089  | 1  | 7027  |
| 4089  | 1  | 83439 |
| 4089  | 1  | 6934  |
| 4089  | 1  | 6932  |
| 4089  | 1  | 51176 |
| 1499  | 1  | 1499  |
| 1499  | -1 | 2033  |
| 1499  | -1 | 1387  |
| 1499  | 1  | 83439 |
| 1499  | 1  | 6934  |
| 1499  | 1  | 6932  |
| 1499  | 1  | 51176 |
| 5663  | -1 | 22926 |
| 5663  | -1 | 2081  |
| 5663  | -1 | 9451  |
| 5663  | 1  | 4855  |
| 5663  | 1  | 4854  |
| 5663  | 1  | 4853  |
| 5663  | 1  | 4851  |
| 5663  | 1  | 1499  |
| 8326  | 1  | 2776  |
| 8326  | 1  | 2775  |
| 8325  | 1  | 2776  |
| 8325  | 1  | 2775  |
| 8324  | 1  | 2776  |
| 8324  | 1  | 2775  |
| 8323  | 1  | 2776  |
| 8323  | 1  | 2775  |
| 8322  | 1  | 2776  |
| 8322  | 1  | 2775  |
| 8321  | 1  | 2776  |
| 8321  | 1  | 2775  |
| 7976  | 1  | 2776  |
| 7976  | 1  | 2775  |
| 7855  | 1  | 2776  |
| 7855  | 1  | 2775  |
| 2535  | 1  | 2776  |
| 2535  | 1  | 2775  |
| 11211 | 1  | 2776  |
| 11211 | 1  | 2775  |
| 89780 | 1  | 8326  |

|       |   |       |
|-------|---|-------|
| 89780 | 1 | 8325  |
| 89780 | 1 | 8324  |
| 89780 | 1 | 8323  |
| 89780 | 1 | 8322  |
| 89780 | 1 | 8321  |
| 89780 | 1 | 7976  |
| 89780 | 1 | 7855  |
| 89780 | 1 | 2535  |
| 89780 | 1 | 11211 |
| 81029 | 1 | 8326  |
| 81029 | 1 | 8325  |
| 81029 | 1 | 8324  |
| 81029 | 1 | 8323  |
| 81029 | 1 | 8322  |
| 81029 | 1 | 8321  |
| 81029 | 1 | 7976  |
| 81029 | 1 | 7855  |
| 81029 | 1 | 2535  |
| 81029 | 1 | 11211 |
| 80326 | 1 | 8326  |
| 80326 | 1 | 8325  |
| 80326 | 1 | 8324  |
| 80326 | 1 | 8323  |
| 80326 | 1 | 8322  |
| 80326 | 1 | 8321  |
| 80326 | 1 | 7976  |
| 80326 | 1 | 7855  |
| 80326 | 1 | 2535  |
| 80326 | 1 | 11211 |
| 7484  | 1 | 8326  |
| 7484  | 1 | 8325  |
| 7484  | 1 | 8324  |
| 7484  | 1 | 8323  |
| 7484  | 1 | 8322  |
| 7484  | 1 | 8321  |
| 7484  | 1 | 7976  |
| 7484  | 1 | 7855  |
| 7484  | 1 | 2535  |
| 7484  | 1 | 11211 |
| 7483  | 1 | 8326  |
| 7483  | 1 | 8325  |
| 7483  | 1 | 8324  |
| 7483  | 1 | 8323  |
| 7483  | 1 | 8322  |
| 7483  | 1 | 8321  |
| 7483  | 1 | 7976  |
| 7483  | 1 | 7855  |
| 7483  | 1 | 2535  |
| 7483  | 1 | 11211 |
| 7482  | 1 | 8326  |
| 7482  | 1 | 8325  |
| 7482  | 1 | 8324  |
| 7482  | 1 | 8323  |
| 7482  | 1 | 8322  |
| 7482  | 1 | 8321  |

|      |   |       |
|------|---|-------|
| 7482 | 1 | 7976  |
| 7482 | 1 | 7855  |
| 7482 | 1 | 2535  |
| 7482 | 1 | 11211 |
| 7481 | 1 | 8326  |
| 7481 | 1 | 8325  |
| 7481 | 1 | 8324  |
| 7481 | 1 | 8323  |
| 7481 | 1 | 8322  |
| 7481 | 1 | 8321  |
| 7481 | 1 | 7976  |
| 7481 | 1 | 7855  |
| 7481 | 1 | 2535  |
| 7481 | 1 | 11211 |
| 7480 | 1 | 8326  |
| 7480 | 1 | 8325  |
| 7480 | 1 | 8324  |
| 7480 | 1 | 8323  |
| 7480 | 1 | 8322  |
| 7480 | 1 | 8321  |
| 7480 | 1 | 7976  |
| 7480 | 1 | 7855  |
| 7480 | 1 | 2535  |
| 7480 | 1 | 11211 |
| 7479 | 1 | 8326  |
| 7479 | 1 | 8325  |
| 7479 | 1 | 8324  |
| 7479 | 1 | 8323  |
| 7479 | 1 | 8322  |
| 7479 | 1 | 8321  |
| 7479 | 1 | 7976  |
| 7479 | 1 | 7855  |
| 7479 | 1 | 2535  |
| 7479 | 1 | 11211 |
| 7478 | 1 | 8326  |
| 7478 | 1 | 8325  |
| 7478 | 1 | 8324  |
| 7478 | 1 | 8323  |
| 7478 | 1 | 8322  |
| 7478 | 1 | 8321  |
| 7478 | 1 | 7976  |
| 7478 | 1 | 7855  |
| 7478 | 1 | 2535  |
| 7478 | 1 | 11211 |
| 7477 | 1 | 8326  |
| 7477 | 1 | 8325  |
| 7477 | 1 | 8324  |
| 7477 | 1 | 8323  |
| 7477 | 1 | 8322  |
| 7477 | 1 | 8321  |
| 7477 | 1 | 7976  |
| 7477 | 1 | 7855  |
| 7477 | 1 | 2535  |
| 7477 | 1 | 11211 |
| 7476 | 1 | 8326  |

|      |   |       |
|------|---|-------|
| 7476 | 1 | 8325  |
| 7476 | 1 | 8324  |
| 7476 | 1 | 8323  |
| 7476 | 1 | 8322  |
| 7476 | 1 | 8321  |
| 7476 | 1 | 7976  |
| 7476 | 1 | 7855  |
| 7476 | 1 | 2535  |
| 7476 | 1 | 11211 |
| 7475 | 1 | 8326  |
| 7475 | 1 | 8325  |
| 7475 | 1 | 8324  |
| 7475 | 1 | 8323  |
| 7475 | 1 | 8322  |
| 7475 | 1 | 8321  |
| 7475 | 1 | 7976  |
| 7475 | 1 | 7855  |
| 7475 | 1 | 2535  |
| 7475 | 1 | 11211 |
| 7474 | 1 | 8326  |
| 7474 | 1 | 8325  |
| 7474 | 1 | 8324  |
| 7474 | 1 | 8323  |
| 7474 | 1 | 8322  |
| 7474 | 1 | 8321  |
| 7474 | 1 | 7976  |
| 7474 | 1 | 7855  |
| 7474 | 1 | 2535  |
| 7474 | 1 | 11211 |
| 7473 | 1 | 8326  |
| 7473 | 1 | 8325  |
| 7473 | 1 | 8324  |
| 7473 | 1 | 8323  |
| 7473 | 1 | 8322  |
| 7473 | 1 | 8321  |
| 7473 | 1 | 7976  |
| 7473 | 1 | 7855  |
| 7473 | 1 | 2535  |
| 7473 | 1 | 11211 |
| 7472 | 1 | 8326  |
| 7472 | 1 | 8325  |
| 7472 | 1 | 8324  |
| 7472 | 1 | 8323  |
| 7472 | 1 | 8322  |
| 7472 | 1 | 8321  |
| 7472 | 1 | 7976  |
| 7472 | 1 | 7855  |
| 7472 | 1 | 2535  |
| 7472 | 1 | 11211 |
| 7471 | 1 | 8326  |
| 7471 | 1 | 8325  |
| 7471 | 1 | 8324  |
| 7471 | 1 | 8323  |
| 7471 | 1 | 8322  |
| 7471 | 1 | 8321  |

|       |   |       |
|-------|---|-------|
| 7471  | 1 | 7976  |
| 7471  | 1 | 7855  |
| 7471  | 1 | 2535  |
| 7471  | 1 | 11211 |
| 54361 | 1 | 8326  |
| 54361 | 1 | 8325  |
| 54361 | 1 | 8324  |
| 54361 | 1 | 8323  |
| 54361 | 1 | 8322  |
| 54361 | 1 | 8321  |
| 54361 | 1 | 7976  |
| 54361 | 1 | 7855  |
| 54361 | 1 | 2535  |
| 54361 | 1 | 11211 |
| 51384 | 1 | 8326  |
| 51384 | 1 | 8325  |
| 51384 | 1 | 8324  |
| 51384 | 1 | 8323  |
| 51384 | 1 | 8322  |
| 51384 | 1 | 8321  |
| 51384 | 1 | 7976  |
| 51384 | 1 | 7855  |
| 51384 | 1 | 2535  |
| 51384 | 1 | 11211 |
| 64840 | 1 | 89780 |
| 64840 | 1 | 81029 |
| 64840 | 1 | 80326 |
| 64840 | 1 | 7484  |
| 64840 | 1 | 7483  |
| 64840 | 1 | 7482  |
| 64840 | 1 | 7481  |
| 64840 | 1 | 7480  |
| 64840 | 1 | 7479  |
| 64840 | 1 | 7478  |
| 64840 | 1 | 7477  |
| 64840 | 1 | 7476  |
| 64840 | 1 | 7475  |
| 64840 | 1 | 7474  |
| 64840 | 1 | 7473  |
| 64840 | 1 | 7472  |
| 64840 | 1 | 7471  |
| 64840 | 1 | 54361 |
| 64840 | 1 | 51384 |
| 9020  | 1 | 8517  |
| 9020  | 1 | 3551  |
| 9020  | 1 | 1147  |
| 840   | 1 | 1676  |
| 843   | 1 | 836   |
| 4615  | 1 | 7189  |
| 4615  | 1 | 51135 |
| 4615  | 1 | 3654  |
| 4615  | 1 | 8772  |
| 51135 | 1 | 3654  |
| 51135 | 1 | 7189  |
| 3654  | 1 | 3665  |

|        |    |       |
|--------|----|-------|
| 3654   | 1  | 7189  |
| 8737   | 1  | 6885  |
| 8737   | 1  | 9020  |
| 8717   | 1  | 7186  |
| 8772   | 1  | 841   |
| 8772   | 1  | 843   |
| 2475   | -1 | 9706  |
| 2475   | -1 | 8408  |
| 2475   | -1 | 25989 |
| 2475   | -1 | 1978  |
| 2475   | -1 | 8660  |
| 2475   | -1 | 8471  |
| 2475   | -1 | 3667  |
| 2475   | 1  | 6199  |
| 2475   | 1  | 6198  |
| 6009   | -1 | 673   |
| 6009   | 1  | 2475  |
| 841    | 1  | 637   |
| 841    | 1  | 840   |
| 841    | 1  | 836   |
| 317    | 1  | 842   |
| 842    | 1  | 840   |
| 842    | 1  | 836   |
| 54205  | 1  | 842   |
| 4193   | -1 | 7157  |
| 4193   | -1 | 5925  |
| 4194   | -1 | 7157  |
| 4194   | 1  | 4193  |
| 731751 | 1  | 7157  |
| 5591   | 1  | 7157  |
| 2033   | 1  | 3516  |
| 2033   | 1  | 11317 |
| 2033   | 1  | 7157  |
| 7157   | 1  | 4193  |
| 1387   | 1  | 3516  |
| 1387   | 1  | 11317 |
| 1387   | 1  | 7157  |
| 5111   | -1 | 896   |
| 5111   | -1 | 894   |
| 5111   | -1 | 595   |
| 5111   | -1 | 1021  |
| 5111   | -1 | 1019  |
| 1442   | 1  | 2690  |
| 7252   | 1  | 7253  |
| 3972   | 1  | 3973  |
| 2488   | 1  | 2492  |
| 1081   | 1  | 7253  |
| 1081   | 1  | 3973  |
| 1081   | 1  | 2492  |
| 5646   | 1  | 9002  |
| 5646   | 1  | 56288 |
| 5646   | 1  | 2151  |
| 5646   | 1  | 2150  |
| 5646   | 1  | 2149  |
| 5645   | 1  | 9002  |

|       |   |        |
|-------|---|--------|
| 5645  | 1 | 56288  |
| 5645  | 1 | 2151   |
| 5645  | 1 | 2150   |
| 5645  | 1 | 2149   |
| 5644  | 1 | 9002   |
| 5644  | 1 | 56288  |
| 5644  | 1 | 2151   |
| 5644  | 1 | 2150   |
| 5644  | 1 | 2149   |
| 5340  | 1 | 9002   |
| 5340  | 1 | 56288  |
| 5340  | 1 | 2151   |
| 5340  | 1 | 2150   |
| 5340  | 1 | 2149   |
| 3001  | 1 | 9002   |
| 3001  | 1 | 56288  |
| 3001  | 1 | 2151   |
| 3001  | 1 | 2150   |
| 3001  | 1 | 2149   |
| 2147  | 1 | 2160   |
| 2147  | 1 | 2158   |
| 2147  | 1 | 7056   |
| 2147  | 1 | 2165   |
| 2147  | 1 | 2162   |
| 2147  | 1 | 2266   |
| 2147  | 1 | 2244   |
| 2147  | 1 | 2243   |
| 2147  | 1 | 9002   |
| 2147  | 1 | 56288  |
| 2147  | 1 | 2151   |
| 2147  | 1 | 2150   |
| 2147  | 1 | 2149   |
| 56288 | 1 | 83700  |
| 56288 | 1 | 58494  |
| 56288 | 1 | 50848  |
| 56288 | 1 | 150084 |
| 1511  | 1 | 9002   |
| 1511  | 1 | 56288  |
| 1511  | 1 | 2151   |
| 1511  | 1 | 2150   |
| 1511  | 1 | 2149   |
| 3707  | 1 | 810    |
| 3707  | 1 | 808    |
| 3707  | 1 | 805    |
| 3707  | 1 | 801    |
| 3707  | 1 | 51806  |
| 3707  | 1 | 163688 |
| 3706  | 1 | 810    |
| 3706  | 1 | 808    |
| 3706  | 1 | 805    |
| 3706  | 1 | 801    |
| 3706  | 1 | 51806  |
| 3706  | 1 | 163688 |
| 3556  | 1 | 4615   |
| 3556  | 1 | 51135  |

|       |    |       |
|-------|----|-------|
| 3556  | 1  | 3656  |
| 3556  | 1  | 3654  |
| 3556  | 1  | 11213 |
| 3556  | 1  | 8717  |
| 3556  | 1  | 8772  |
| 8200  | 1  | 659   |
| 8200  | 1  | 269   |
| 8200  | 1  | 93    |
| 8200  | 1  | 92    |
| 8200  | 1  | 657   |
| 655   | 1  | 659   |
| 655   | 1  | 269   |
| 655   | 1  | 93    |
| 655   | 1  | 92    |
| 655   | 1  | 658   |
| 650   | 1  | 269   |
| 650   | 1  | 657   |
| 650   | 1  | 658   |
| 650   | 1  | 659   |
| 650   | 1  | 94    |
| 650   | 1  | 90    |
| 268   | 1  | 659   |
| 268   | 1  | 269   |
| 268   | 1  | 94    |
| 268   | 1  | 90    |
| 83729 | -1 | 4838  |
| 83729 | -1 | 7043  |
| 83729 | -1 | 7042  |
| 83729 | -1 | 7040  |
| 83729 | 1  | 91    |
| 83729 | 1  | 93    |
| 83729 | 1  | 92    |
| 83729 | 1  | 94    |
| 83729 | 1  | 90    |
| 3626  | -1 | 4838  |
| 3626  | -1 | 7043  |
| 3626  | -1 | 7042  |
| 3626  | -1 | 7040  |
| 3626  | 1  | 91    |
| 3626  | 1  | 93    |
| 3626  | 1  | 92    |
| 3626  | 1  | 94    |
| 3626  | 1  | 90    |
| 3625  | -1 | 4838  |
| 3625  | -1 | 7043  |
| 3625  | -1 | 7042  |
| 3625  | -1 | 7040  |
| 3625  | 1  | 91    |
| 3625  | 1  | 93    |
| 3625  | 1  | 92    |
| 3625  | 1  | 94    |
| 3625  | 1  | 90    |
| 3624  | -1 | 4838  |
| 3624  | -1 | 7043  |
| 3624  | -1 | 7042  |

|        |    |        |
|--------|----|--------|
| 3624   | -1 | 7040   |
| 3624   | 1  | 91     |
| 3624   | 1  | 93     |
| 3624   | 1  | 92     |
| 3624   | 1  | 94     |
| 3624   | 1  | 90     |
| 959    | 1  | 958    |
| 8740   | 1  | 8771   |
| 8740   | 1  | 8764   |
| 8740   | 1  | 4055   |
| 4050   | 1  | 4055   |
| 4049   | 1  | 5721   |
| 4049   | 1  | 5720   |
| 4049   | 1  | 10197  |
| 4049   | 1  | 8764   |
| 4049   | 1  | 4055   |
| 4049   | 1  | 7132   |
| 4049   | 1  | 7133   |
| 7133   | 1  | 1616   |
| 7133   | 1  | 7186   |
| 8600   | 1  | 8792   |
| 8600   | 1  | 4982   |
| 8793   | 1  | 8772   |
| 8794   | 1  | 8772   |
| 8795   | 1  | 8772   |
| 8797   | 1  | 8772   |
| 8743   | 1  | 4982   |
| 8743   | 1  | 8793   |
| 8743   | 1  | 8794   |
| 8743   | 1  | 8795   |
| 8743   | 1  | 8797   |
| 282618 | 1  | 163702 |
| 282618 | 1  | 3588   |
| 282617 | 1  | 163702 |
| 282617 | 1  | 3588   |
| 282616 | 1  | 163702 |
| 282616 | 1  | 3588   |
| 50616  | 1  | 116379 |
| 50616  | 1  | 58985  |
| 50616  | 1  | 3588   |
| 11009  | 1  | 58985  |
| 11009  | 1  | 53832  |
| 50604  | 1  | 58985  |
| 50604  | 1  | 53832  |
| 29949  | 1  | 53832  |
| 3586   | 1  | 3587   |
| 3586   | 1  | 3588   |
| 3458   | 1  | 3455   |
| 3458   | 1  | 3454   |
| 3458   | 1  | 3459   |
| 3458   | 1  | 3460   |
| 338376 | 1  | 3454   |
| 338376 | 1  | 3455   |
| 56832  | 1  | 3454   |
| 56832  | 1  | 3455   |

|      |   |       |
|------|---|-------|
| 3467 | 1 | 3454  |
| 3467 | 1 | 3455  |
| 3456 | 1 | 3460  |
| 3456 | 1 | 3459  |
| 3456 | 1 | 3454  |
| 3456 | 1 | 3455  |
| 3452 | 1 | 3460  |
| 3452 | 1 | 3459  |
| 3452 | 1 | 5721  |
| 3452 | 1 | 5720  |
| 3452 | 1 | 10197 |
| 3452 | 1 | 3454  |
| 3452 | 1 | 3455  |
| 3451 | 1 | 3460  |
| 3451 | 1 | 3459  |
| 3451 | 1 | 5721  |
| 3451 | 1 | 5720  |
| 3451 | 1 | 10197 |
| 3451 | 1 | 3454  |
| 3451 | 1 | 3455  |
| 3449 | 1 | 3460  |
| 3449 | 1 | 3459  |
| 3449 | 1 | 5721  |
| 3449 | 1 | 5720  |
| 3449 | 1 | 10197 |
| 3449 | 1 | 3454  |
| 3449 | 1 | 3455  |
| 3448 | 1 | 3460  |
| 3448 | 1 | 3459  |
| 3448 | 1 | 5721  |
| 3448 | 1 | 5720  |
| 3448 | 1 | 10197 |
| 3448 | 1 | 3454  |
| 3448 | 1 | 3455  |
| 3447 | 1 | 3460  |
| 3447 | 1 | 3459  |
| 3447 | 1 | 5721  |
| 3447 | 1 | 5720  |
| 3447 | 1 | 10197 |
| 3447 | 1 | 3454  |
| 3447 | 1 | 3455  |
| 3446 | 1 | 3460  |
| 3446 | 1 | 3459  |
| 3446 | 1 | 5721  |
| 3446 | 1 | 5720  |
| 3446 | 1 | 10197 |
| 3446 | 1 | 3454  |
| 3446 | 1 | 3455  |
| 3445 | 1 | 3460  |
| 3445 | 1 | 3459  |
| 3445 | 1 | 5721  |
| 3445 | 1 | 5720  |
| 3445 | 1 | 10197 |
| 3445 | 1 | 3454  |
| 3445 | 1 | 3455  |

|      |    |       |
|------|----|-------|
| 3444 | 1  | 3460  |
| 3444 | 1  | 3459  |
| 3444 | 1  | 5721  |
| 3444 | 1  | 5720  |
| 3444 | 1  | 10197 |
| 3444 | 1  | 3454  |
| 3444 | 1  | 3455  |
| 3443 | 1  | 3460  |
| 3443 | 1  | 3459  |
| 3443 | 1  | 5721  |
| 3443 | 1  | 5720  |
| 3443 | 1  | 10197 |
| 3443 | 1  | 3454  |
| 3443 | 1  | 3455  |
| 3442 | 1  | 3460  |
| 3442 | 1  | 3459  |
| 3442 | 1  | 5721  |
| 3442 | 1  | 5720  |
| 3442 | 1  | 10197 |
| 3442 | 1  | 3454  |
| 3442 | 1  | 3455  |
| 3441 | 1  | 3460  |
| 3441 | 1  | 3459  |
| 3441 | 1  | 5721  |
| 3441 | 1  | 5720  |
| 3441 | 1  | 10197 |
| 3441 | 1  | 3454  |
| 3441 | 1  | 3455  |
| 3440 | 1  | 3460  |
| 3440 | 1  | 3459  |
| 3440 | 1  | 5721  |
| 3440 | 1  | 5720  |
| 3440 | 1  | 10197 |
| 3440 | 1  | 3454  |
| 3440 | 1  | 3455  |
| 3439 | 1  | 3460  |
| 3439 | 1  | 3459  |
| 3439 | 1  | 5721  |
| 3439 | 1  | 5720  |
| 3439 | 1  | 10197 |
| 3439 | 1  | 3454  |
| 3439 | 1  | 3455  |
| 2322 | -1 | 6688  |
| 2322 | -1 | 1050  |
| 2322 | 1  | 6777  |
| 2322 | 1  | 6776  |
| 2322 | 1  | 6774  |
| 2322 | 1  | 2885  |
| 2322 | 1  | 8503  |
| 2322 | 1  | 5296  |
| 2322 | 1  | 5295  |
| 2322 | 1  | 5294  |
| 2322 | 1  | 5293  |
| 2322 | 1  | 5291  |
| 2322 | 1  | 5290  |

|      |    |        |
|------|----|--------|
| 2322 | 1  | 23533  |
| 2323 | 1  | 2322   |
| 3815 | 1  | 6777   |
| 3815 | 1  | 6776   |
| 3815 | 1  | 6774   |
| 3815 | 1  | 2885   |
| 3815 | 1  | 8503   |
| 3815 | 1  | 5296   |
| 3815 | 1  | 5295   |
| 3815 | 1  | 5294   |
| 3815 | 1  | 5293   |
| 3815 | 1  | 5291   |
| 3815 | 1  | 5290   |
| 3815 | 1  | 23533  |
| 3815 | 1  | 4893   |
| 3815 | 1  | 3845   |
| 3815 | 1  | 3265   |
| 4254 | 1  | 3815   |
| 4233 | -1 | 1499   |
| 4233 | -1 | 1500   |
| 4233 | 1  | 2549   |
| 4233 | 1  | 4893   |
| 4233 | 1  | 3845   |
| 4233 | 1  | 3265   |
| 4233 | 1  | 2885   |
| 4233 | 1  | 6464   |
| 4233 | 1  | 53358  |
| 4233 | 1  | 399694 |
| 4233 | 1  | 25759  |
| 4233 | 1  | 8503   |
| 4233 | 1  | 5296   |
| 4233 | 1  | 5295   |
| 4233 | 1  | 5294   |
| 4233 | 1  | 5293   |
| 4233 | 1  | 5291   |
| 4233 | 1  | 5290   |
| 4233 | 1  | 23533  |
| 4233 | 1  | 5747   |
| 3082 | 1  | 2260   |
| 3082 | 1  | 5159   |
| 3082 | 1  | 5156   |
| 3082 | 1  | 3791   |
| 3082 | 1  | 3480   |
| 3082 | 1  | 2324   |
| 3082 | 1  | 2321   |
| 3082 | 1  | 2064   |
| 3082 | 1  | 1956   |
| 3082 | 1  | 4233   |
| 2324 | 1  | 6464   |
| 2324 | 1  | 53358  |
| 2324 | 1  | 399694 |
| 2324 | 1  | 25759  |
| 2324 | 1  | 8503   |
| 2324 | 1  | 5296   |
| 2324 | 1  | 5295   |

|      |   |        |
|------|---|--------|
| 2324 | 1 | 5294   |
| 2324 | 1 | 5293   |
| 2324 | 1 | 5291   |
| 2324 | 1 | 5290   |
| 2324 | 1 | 23533  |
| 2324 | 1 | 5747   |
| 7424 | 1 | 5159   |
| 7424 | 1 | 5156   |
| 7424 | 1 | 4233   |
| 7424 | 1 | 3480   |
| 7424 | 1 | 2321   |
| 7424 | 1 | 2064   |
| 7424 | 1 | 1956   |
| 7424 | 1 | 2324   |
| 7424 | 1 | 3791   |
| 2277 | 1 | 5159   |
| 2277 | 1 | 5156   |
| 2277 | 1 | 4233   |
| 2277 | 1 | 3480   |
| 2277 | 1 | 2321   |
| 2277 | 1 | 2064   |
| 2277 | 1 | 1956   |
| 2277 | 1 | 2324   |
| 2277 | 1 | 3791   |
| 3791 | 1 | 6464   |
| 3791 | 1 | 53358  |
| 3791 | 1 | 399694 |
| 3791 | 1 | 6714   |
| 3791 | 1 | 8503   |
| 3791 | 1 | 5296   |
| 3791 | 1 | 5295   |
| 3791 | 1 | 5294   |
| 3791 | 1 | 5293   |
| 3791 | 1 | 5291   |
| 3791 | 1 | 5290   |
| 3791 | 1 | 23533  |
| 3791 | 1 | 998    |
| 3791 | 1 | 5829   |
| 3791 | 1 | 5747   |
| 3791 | 1 | 25759  |
| 3791 | 1 | 5336   |
| 3791 | 1 | 5335   |
| 3791 | 1 | 9047   |
| 7422 | 1 | 5159   |
| 7422 | 1 | 5156   |
| 7422 | 1 | 4233   |
| 7422 | 1 | 3480   |
| 7422 | 1 | 2324   |
| 7422 | 1 | 2064   |
| 7422 | 1 | 1956   |
| 7422 | 1 | 3791   |
| 7422 | 1 | 2321   |
| 2321 | 1 | 6464   |
| 2321 | 1 | 53358  |
| 2321 | 1 | 399694 |

|       |   |       |
|-------|---|-------|
| 2321  | 1 | 25759 |
| 2321  | 1 | 8503  |
| 2321  | 1 | 5296  |
| 2321  | 1 | 5295  |
| 2321  | 1 | 5294  |
| 2321  | 1 | 5293  |
| 2321  | 1 | 5291  |
| 2321  | 1 | 5290  |
| 2321  | 1 | 23533 |
| 2321  | 1 | 5747  |
| 7423  | 1 | 5159  |
| 7423  | 1 | 5156  |
| 7423  | 1 | 4233  |
| 7423  | 1 | 3791  |
| 7423  | 1 | 3480  |
| 7423  | 1 | 2324  |
| 7423  | 1 | 2064  |
| 7423  | 1 | 1956  |
| 7423  | 1 | 2321  |
| 80301 | 1 | 5159  |
| 56034 | 1 | 3645  |
| 56034 | 1 | 2263  |
| 56034 | 1 | 2260  |
| 56034 | 1 | 5159  |
| 56034 | 1 | 4233  |
| 56034 | 1 | 3791  |
| 56034 | 1 | 3480  |
| 56034 | 1 | 2324  |
| 56034 | 1 | 2321  |
| 56034 | 1 | 2064  |
| 56034 | 1 | 1956  |
| 56034 | 1 | 5156  |
| 7173  | 1 | 4352  |
| 5617  | 1 | 5618  |
| 2689  | 1 | 2690  |
| 2688  | 1 | 2690  |
| 2056  | 1 | 2057  |
| 85480 | 1 | 3575  |
| 85480 | 1 | 64109 |
| 59067 | 1 | 50615 |
| 59067 | 1 | 3561  |
| 3600  | 1 | 3601  |
| 3600  | 1 | 3560  |
| 3600  | 1 | 3561  |
| 3578  | 1 | 3581  |
| 3578  | 1 | 3561  |
| 3574  | 1 | 3575  |
| 3574  | 1 | 3561  |
| 3558  | 1 | 3559  |
| 3558  | 1 | 3560  |
| 3558  | 1 | 3561  |
| 3567  | 1 | 3568  |
| 3567  | 1 | 1439  |
| 3562  | 1 | 3563  |
| 3562  | 1 | 1439  |

|       |   |        |
|-------|---|--------|
| 1437  | 1 | 1438   |
| 1437  | 1 | 1439   |
| 51561 | 1 | 149233 |
| 51561 | 1 | 3594   |
| 3593  | 1 | 3594   |
| 3593  | 1 | 3595   |
| 3592  | 1 | 3594   |
| 3592  | 1 | 3595   |
| 3596  | 1 | 3566   |
| 3596  | 1 | 3597   |
| 3565  | 1 | 3561   |
| 3565  | 1 | 3566   |
| 3565  | 1 | 3597   |
| 3952  | 1 | 3953   |
| 1440  | 1 | 1441   |
| 1489  | 1 | 3572   |
| 1489  | 1 | 3977   |
| 23529 | 1 | 1271   |
| 23529 | 1 | 3572   |
| 23529 | 1 | 3977   |
| 1270  | 1 | 1271   |
| 1270  | 1 | 3572   |
| 1270  | 1 | 3977   |
| 3976  | 1 | 3572   |
| 3976  | 1 | 3977   |
| 5008  | 1 | 9180   |
| 5008  | 1 | 3977   |
| 5008  | 1 | 3572   |
| 3589  | 1 | 3590   |
| 3589  | 1 | 3572   |
| 3569  | 1 | 3570   |
| 3569  | 1 | 3572   |
| 7852  | 1 | 2773   |
| 7852  | 1 | 2771   |
| 7852  | 1 | 2770   |
| 6387  | 1 | 7852   |
| 887   | 1 | 9630   |
| 887   | 1 | 2776   |
| 887   | 1 | 2769   |
| 887   | 1 | 2767   |
| 886   | 1 | 9630   |
| 886   | 1 | 2776   |
| 886   | 1 | 2769   |
| 886   | 1 | 2767   |
| 7201  | 1 | 9630   |
| 7201  | 1 | 2776   |
| 7201  | 1 | 2769   |
| 7201  | 1 | 2767   |
| 6915  | 1 | 9630   |
| 6915  | 1 | 2776   |
| 6915  | 1 | 2769   |
| 6915  | 1 | 2767   |
| 6870  | 1 | 9630   |
| 6870  | 1 | 2776   |
| 6870  | 1 | 2769   |

|       |   |       |
|-------|---|-------|
| 6870  | 1 | 2767  |
| 6869  | 1 | 9630  |
| 6869  | 1 | 2776  |
| 6869  | 1 | 2769  |
| 6869  | 1 | 2767  |
| 6865  | 1 | 9630  |
| 6865  | 1 | 2776  |
| 6865  | 1 | 2769  |
| 6865  | 1 | 2767  |
| 624   | 1 | 55970 |
| 624   | 1 | 9630  |
| 624   | 1 | 2776  |
| 624   | 1 | 2769  |
| 624   | 1 | 2767  |
| 623   | 1 | 55970 |
| 623   | 1 | 9630  |
| 623   | 1 | 2776  |
| 623   | 1 | 2769  |
| 623   | 1 | 2767  |
| 5737  | 1 | 9630  |
| 5737  | 1 | 2776  |
| 5737  | 1 | 2769  |
| 5737  | 1 | 2767  |
| 5733  | 1 | 9630  |
| 5733  | 1 | 2776  |
| 5733  | 1 | 2769  |
| 5733  | 1 | 2767  |
| 5731  | 1 | 9630  |
| 5731  | 1 | 2776  |
| 5731  | 1 | 2769  |
| 5731  | 1 | 2767  |
| 5724  | 1 | 9630  |
| 5724  | 1 | 2776  |
| 5724  | 1 | 2769  |
| 5724  | 1 | 2767  |
| 57105 | 1 | 9630  |
| 57105 | 1 | 2776  |
| 57105 | 1 | 2769  |
| 57105 | 1 | 2767  |
| 56413 | 1 | 9630  |
| 56413 | 1 | 2776  |
| 56413 | 1 | 2769  |
| 56413 | 1 | 2767  |
| 553   | 1 | 9630  |
| 553   | 1 | 2776  |
| 553   | 1 | 2769  |
| 553   | 1 | 2767  |
| 552   | 1 | 9630  |
| 552   | 1 | 2776  |
| 552   | 1 | 2769  |
| 552   | 1 | 2767  |
| 5021  | 1 | 9630  |
| 5021  | 1 | 2776  |
| 5021  | 1 | 2769  |
| 5021  | 1 | 2767  |

|      |   |       |
|------|---|-------|
| 4923 | 1 | 9630  |
| 4923 | 1 | 2776  |
| 4923 | 1 | 2769  |
| 4923 | 1 | 2767  |
| 3973 | 1 | 9630  |
| 3973 | 1 | 2776  |
| 3973 | 1 | 2769  |
| 3973 | 1 | 2767  |
| 3358 | 1 | 9630  |
| 3358 | 1 | 2776  |
| 3358 | 1 | 2769  |
| 3358 | 1 | 2767  |
| 3357 | 1 | 9630  |
| 3357 | 1 | 2776  |
| 3357 | 1 | 2769  |
| 3357 | 1 | 2767  |
| 3356 | 1 | 9630  |
| 3356 | 1 | 2776  |
| 3356 | 1 | 2769  |
| 3356 | 1 | 2767  |
| 3269 | 1 | 9630  |
| 3269 | 1 | 2776  |
| 3269 | 1 | 2769  |
| 3269 | 1 | 2767  |
| 2925 | 1 | 9630  |
| 2925 | 1 | 2776  |
| 2925 | 1 | 2769  |
| 2925 | 1 | 2767  |
| 2915 | 1 | 2781  |
| 2915 | 1 | 2778  |
| 2915 | 1 | 2775  |
| 2915 | 1 | 2773  |
| 2915 | 1 | 2771  |
| 2915 | 1 | 2770  |
| 2915 | 1 | 2768  |
| 2915 | 1 | 10672 |
| 2915 | 1 | 9630  |
| 2915 | 1 | 2776  |
| 2915 | 1 | 2769  |
| 2915 | 1 | 2767  |
| 2911 | 1 | 2781  |
| 2911 | 1 | 2778  |
| 2911 | 1 | 2775  |
| 2911 | 1 | 2773  |
| 2911 | 1 | 2771  |
| 2911 | 1 | 2770  |
| 2911 | 1 | 2768  |
| 2911 | 1 | 10672 |
| 2911 | 1 | 9630  |
| 2911 | 1 | 2776  |
| 2911 | 1 | 2769  |
| 2911 | 1 | 2767  |
| 2149 | 1 | 2768  |
| 2149 | 1 | 10672 |
| 2149 | 1 | 9630  |

|      |   |       |
|------|---|-------|
| 2149 | 1 | 2776  |
| 2149 | 1 | 2769  |
| 2149 | 1 | 2767  |
| 1910 | 1 | 2775  |
| 1910 | 1 | 2773  |
| 1910 | 1 | 2771  |
| 1910 | 1 | 2770  |
| 1910 | 1 | 9630  |
| 1910 | 1 | 2776  |
| 1910 | 1 | 2769  |
| 1910 | 1 | 2767  |
| 1909 | 1 | 9630  |
| 1909 | 1 | 2776  |
| 1909 | 1 | 2769  |
| 1909 | 1 | 2767  |
| 185  | 1 | 9630  |
| 185  | 1 | 2776  |
| 185  | 1 | 2769  |
| 185  | 1 | 2767  |
| 148  | 1 | 9630  |
| 148  | 1 | 2776  |
| 148  | 1 | 2769  |
| 148  | 1 | 2767  |
| 147  | 1 | 9630  |
| 147  | 1 | 2776  |
| 147  | 1 | 2769  |
| 147  | 1 | 2767  |
| 146  | 1 | 9630  |
| 146  | 1 | 2776  |
| 146  | 1 | 2769  |
| 146  | 1 | 2767  |
| 1129 | 1 | 55970 |
| 1129 | 1 | 9630  |
| 1129 | 1 | 2776  |
| 1129 | 1 | 2769  |
| 1129 | 1 | 2767  |
| 9630 | 1 | 5332  |
| 9630 | 1 | 5331  |
| 9630 | 1 | 5330  |
| 9630 | 1 | 23236 |
| 2776 | 1 | 1857  |
| 2776 | 1 | 1856  |
| 2776 | 1 | 1855  |
| 2776 | 1 | 5332  |
| 2776 | 1 | 5331  |
| 2776 | 1 | 5330  |
| 2776 | 1 | 23236 |
| 2769 | 1 | 5332  |
| 2769 | 1 | 5331  |
| 2769 | 1 | 5330  |
| 2769 | 1 | 23236 |
| 2767 | 1 | 5332  |
| 2767 | 1 | 5331  |
| 2767 | 1 | 5330  |
| 2767 | 1 | 23236 |

|       |   |       |
|-------|---|-------|
| 10800 | 1 | 9630  |
| 10800 | 1 | 2776  |
| 10800 | 1 | 2769  |
| 10800 | 1 | 2767  |
| 810   | 1 | 5837  |
| 810   | 1 | 5836  |
| 810   | 1 | 5834  |
| 810   | 1 | 814   |
| 810   | 1 | 4893  |
| 810   | 1 | 3845  |
| 810   | 1 | 3265  |
| 810   | 1 | 818   |
| 810   | 1 | 817   |
| 810   | 1 | 816   |
| 810   | 1 | 815   |
| 810   | 1 | 63928 |
| 810   | 1 | 5535  |
| 810   | 1 | 5534  |
| 810   | 1 | 5533  |
| 810   | 1 | 5532  |
| 810   | 1 | 5530  |
| 810   | 1 | 11261 |
| 810   | 1 | 114   |
| 810   | 1 | 109   |
| 810   | 1 | 107   |
| 810   | 1 | 5153  |
| 810   | 1 | 5137  |
| 810   | 1 | 5136  |
| 810   | 1 | 91807 |
| 810   | 1 | 85366 |
| 810   | 1 | 4638  |
| 808   | 1 | 5837  |
| 808   | 1 | 5836  |
| 808   | 1 | 5834  |
| 808   | 1 | 814   |
| 808   | 1 | 4893  |
| 808   | 1 | 3845  |
| 808   | 1 | 3265  |
| 808   | 1 | 818   |
| 808   | 1 | 817   |
| 808   | 1 | 816   |
| 808   | 1 | 815   |
| 808   | 1 | 63928 |
| 808   | 1 | 5535  |
| 808   | 1 | 5534  |
| 808   | 1 | 5533  |
| 808   | 1 | 5532  |
| 808   | 1 | 5530  |
| 808   | 1 | 11261 |
| 808   | 1 | 114   |
| 808   | 1 | 109   |
| 808   | 1 | 107   |
| 808   | 1 | 5153  |
| 808   | 1 | 5137  |
| 808   | 1 | 5136  |

|     |   |       |
|-----|---|-------|
| 808 | 1 | 91807 |
| 808 | 1 | 85366 |
| 808 | 1 | 4638  |
| 805 | 1 | 5837  |
| 805 | 1 | 5836  |
| 805 | 1 | 5834  |
| 805 | 1 | 814   |
| 805 | 1 | 4893  |
| 805 | 1 | 3845  |
| 805 | 1 | 3265  |
| 805 | 1 | 818   |
| 805 | 1 | 817   |
| 805 | 1 | 816   |
| 805 | 1 | 815   |
| 805 | 1 | 63928 |
| 805 | 1 | 5535  |
| 805 | 1 | 5534  |
| 805 | 1 | 5533  |
| 805 | 1 | 5532  |
| 805 | 1 | 5530  |
| 805 | 1 | 11261 |
| 805 | 1 | 114   |
| 805 | 1 | 109   |
| 805 | 1 | 107   |
| 805 | 1 | 5153  |
| 805 | 1 | 5137  |
| 805 | 1 | 5136  |
| 805 | 1 | 91807 |
| 805 | 1 | 85366 |
| 805 | 1 | 4638  |
| 801 | 1 | 5837  |
| 801 | 1 | 5836  |
| 801 | 1 | 5834  |
| 801 | 1 | 814   |
| 801 | 1 | 4893  |
| 801 | 1 | 3845  |
| 801 | 1 | 3265  |
| 801 | 1 | 818   |
| 801 | 1 | 817   |
| 801 | 1 | 816   |
| 801 | 1 | 815   |
| 801 | 1 | 63928 |
| 801 | 1 | 5535  |
| 801 | 1 | 5534  |
| 801 | 1 | 5533  |
| 801 | 1 | 5532  |
| 801 | 1 | 5530  |
| 801 | 1 | 11261 |
| 801 | 1 | 114   |
| 801 | 1 | 109   |
| 801 | 1 | 107   |
| 801 | 1 | 5153  |
| 801 | 1 | 5137  |
| 801 | 1 | 5136  |
| 801 | 1 | 91807 |

|        |   |        |
|--------|---|--------|
| 801    | 1 | 85366  |
| 801    | 1 | 4638   |
| 51806  | 1 | 5837   |
| 51806  | 1 | 5836   |
| 51806  | 1 | 5834   |
| 51806  | 1 | 814    |
| 51806  | 1 | 4893   |
| 51806  | 1 | 3845   |
| 51806  | 1 | 3265   |
| 51806  | 1 | 818    |
| 51806  | 1 | 817    |
| 51806  | 1 | 816    |
| 51806  | 1 | 815    |
| 51806  | 1 | 63928  |
| 51806  | 1 | 5535   |
| 51806  | 1 | 5534   |
| 51806  | 1 | 5533   |
| 51806  | 1 | 5532   |
| 51806  | 1 | 5530   |
| 51806  | 1 | 11261  |
| 51806  | 1 | 114    |
| 51806  | 1 | 109    |
| 51806  | 1 | 107    |
| 51806  | 1 | 5153   |
| 51806  | 1 | 5137   |
| 51806  | 1 | 5136   |
| 51806  | 1 | 91807  |
| 51806  | 1 | 85366  |
| 51806  | 1 | 4638   |
| 91807  | 1 | 93408  |
| 91807  | 1 | 58498  |
| 91807  | 1 | 4636   |
| 91807  | 1 | 4633   |
| 91807  | 1 | 29895  |
| 91807  | 1 | 10627  |
| 91807  | 1 | 10398  |
| 91807  | 1 | 103910 |
| 85366  | 1 | 93408  |
| 85366  | 1 | 58498  |
| 85366  | 1 | 4636   |
| 85366  | 1 | 4633   |
| 85366  | 1 | 29895  |
| 85366  | 1 | 10627  |
| 85366  | 1 | 10398  |
| 85366  | 1 | 103910 |
| 4638   | 1 | 93408  |
| 4638   | 1 | 58498  |
| 4638   | 1 | 4636   |
| 4638   | 1 | 4633   |
| 4638   | 1 | 29895  |
| 4638   | 1 | 10627  |
| 4638   | 1 | 10398  |
| 4638   | 1 | 103910 |
| 163688 | 1 | 5837   |
| 163688 | 1 | 5836   |

|        |   |       |
|--------|---|-------|
| 163688 | 1 | 5834  |
| 163688 | 1 | 814   |
| 163688 | 1 | 4893  |
| 163688 | 1 | 3845  |
| 163688 | 1 | 3265  |
| 163688 | 1 | 818   |
| 163688 | 1 | 817   |
| 163688 | 1 | 816   |
| 163688 | 1 | 815   |
| 163688 | 1 | 63928 |
| 163688 | 1 | 5535  |
| 163688 | 1 | 5534  |
| 163688 | 1 | 5533  |
| 163688 | 1 | 5532  |
| 163688 | 1 | 5530  |
| 163688 | 1 | 11261 |
| 163688 | 1 | 114   |
| 163688 | 1 | 109   |
| 163688 | 1 | 107   |
| 163688 | 1 | 5153  |
| 163688 | 1 | 5137  |
| 163688 | 1 | 5136  |
| 163688 | 1 | 91807 |
| 163688 | 1 | 85366 |
| 163688 | 1 | 4638  |
| 5336   | 1 | 7410  |
| 5336   | 1 | 7409  |
| 5336   | 1 | 10451 |
| 5336   | 1 | 4846  |
| 5336   | 1 | 8681  |
| 5336   | 1 | 84647 |
| 5336   | 1 | 8399  |
| 5336   | 1 | 8398  |
| 5336   | 1 | 81579 |
| 5336   | 1 | 64600 |
| 5336   | 1 | 5322  |
| 5336   | 1 | 5321  |
| 5336   | 1 | 5320  |
| 5336   | 1 | 5319  |
| 5336   | 1 | 50487 |
| 5336   | 1 | 30814 |
| 5336   | 1 | 26279 |
| 5336   | 1 | 1E+08 |
| 5336   | 1 | 5582  |
| 5336   | 1 | 5579  |
| 5336   | 1 | 5578  |
| 5336   | 1 | 63928 |
| 5336   | 1 | 5535  |
| 5336   | 1 | 5534  |
| 5336   | 1 | 5533  |
| 5336   | 1 | 5532  |
| 5336   | 1 | 5530  |
| 5336   | 1 | 11261 |
| 5335   | 1 | 7410  |
| 5335   | 1 | 7409  |

|      |   |       |
|------|---|-------|
| 5335 | 1 | 10451 |
| 5335 | 1 | 4846  |
| 5335 | 1 | 8681  |
| 5335 | 1 | 84647 |
| 5335 | 1 | 8399  |
| 5335 | 1 | 8398  |
| 5335 | 1 | 81579 |
| 5335 | 1 | 64600 |
| 5335 | 1 | 5322  |
| 5335 | 1 | 5321  |
| 5335 | 1 | 5320  |
| 5335 | 1 | 5319  |
| 5335 | 1 | 50487 |
| 5335 | 1 | 30814 |
| 5335 | 1 | 26279 |
| 5335 | 1 | 1E+08 |
| 5335 | 1 | 5582  |
| 5335 | 1 | 5579  |
| 5335 | 1 | 5578  |
| 5335 | 1 | 63928 |
| 5335 | 1 | 5535  |
| 5335 | 1 | 5534  |
| 5335 | 1 | 5533  |
| 5335 | 1 | 5532  |
| 5335 | 1 | 5530  |
| 5335 | 1 | 11261 |
| 3363 | 1 | 2778  |
| 3363 | 1 | 2774  |
| 3362 | 1 | 2778  |
| 3362 | 1 | 2774  |
| 3361 | 1 | 2778  |
| 3361 | 1 | 2774  |
| 3360 | 1 | 2778  |
| 3360 | 1 | 2774  |
| 3274 | 1 | 2778  |
| 3274 | 1 | 2774  |
| 1816 | 1 | 2778  |
| 1816 | 1 | 2774  |
| 1812 | 1 | 2778  |
| 1812 | 1 | 2774  |
| 155  | 1 | 2778  |
| 155  | 1 | 2774  |
| 154  | 1 | 2778  |
| 154  | 1 | 2774  |
| 153  | 1 | 2778  |
| 153  | 1 | 2774  |
| 136  | 1 | 2778  |
| 136  | 1 | 2774  |
| 135  | 1 | 2778  |
| 135  | 1 | 2774  |
| 1133 | 1 | 55970 |
| 1133 | 1 | 2778  |
| 1133 | 1 | 2774  |
| 1131 | 1 | 55970 |
| 1131 | 1 | 9630  |

|      |   |        |
|------|---|--------|
| 1131 | 1 | 2776   |
| 1131 | 1 | 2769   |
| 1131 | 1 | 2767   |
| 1131 | 1 | 2778   |
| 1131 | 1 | 2774   |
| 2778 | 1 | 8681   |
| 2778 | 1 | 84647  |
| 2778 | 1 | 8399   |
| 2778 | 1 | 8398   |
| 2778 | 1 | 81579  |
| 2778 | 1 | 64600  |
| 2778 | 1 | 5322   |
| 2778 | 1 | 5321   |
| 2778 | 1 | 5320   |
| 2778 | 1 | 5319   |
| 2778 | 1 | 50487  |
| 2778 | 1 | 30814  |
| 2778 | 1 | 26279  |
| 2778 | 1 | 1E+08  |
| 2778 | 1 | 112    |
| 2778 | 1 | 111    |
| 2778 | 1 | 196883 |
| 2778 | 1 | 115    |
| 2778 | 1 | 114    |
| 2778 | 1 | 113    |
| 2778 | 1 | 109    |
| 2778 | 1 | 108    |
| 2778 | 1 | 107    |
| 2774 | 1 | 196883 |
| 2774 | 1 | 115    |
| 2774 | 1 | 114    |
| 2774 | 1 | 113    |
| 2774 | 1 | 109    |
| 2774 | 1 | 108    |
| 2774 | 1 | 107    |
| 1128 | 1 | 55970  |
| 1128 | 1 | 9630   |
| 1128 | 1 | 2776   |
| 1128 | 1 | 2769   |
| 1128 | 1 | 2767   |
| 1128 | 1 | 2778   |
| 1128 | 1 | 2774   |
| 2549 | 1 | 2885   |
| 2549 | 1 | 5781   |
| 2549 | 1 | 1399   |
| 2549 | 1 | 1398   |
| 2549 | 1 | 8503   |
| 2549 | 1 | 5296   |
| 2549 | 1 | 5295   |
| 2549 | 1 | 5294   |
| 2549 | 1 | 5293   |
| 2549 | 1 | 5291   |
| 2549 | 1 | 5290   |
| 2549 | 1 | 23533  |
| 369  | 1 | 5605   |

|        |    |       |
|--------|----|-------|
| 369    | 1  | 5604  |
| 6464   | 1  | 2885  |
| 53358  | 1  | 2885  |
| 399694 | 1  | 2885  |
| 25759  | 1  | 2885  |
| 8440   | 1  | 5747  |
| 8440   | 1  | 57144 |
| 8440   | 1  | 56924 |
| 8440   | 1  | 5063  |
| 8440   | 1  | 5062  |
| 8440   | 1  | 5058  |
| 8440   | 1  | 10298 |
| 57144  | -1 | 91807 |
| 57144  | -1 | 85366 |
| 57144  | -1 | 4638  |
| 57144  | 1  | 3985  |
| 57144  | 1  | 3984  |
| 56924  | -1 | 91807 |
| 56924  | -1 | 85366 |
| 56924  | -1 | 4638  |
| 56924  | 1  | 3985  |
| 56924  | 1  | 3984  |
| 5063   | -1 | 91807 |
| 5063   | -1 | 85366 |
| 5063   | -1 | 4638  |
| 5063   | 1  | 3985  |
| 5063   | 1  | 3984  |
| 10298  | -1 | 91807 |
| 10298  | -1 | 85366 |
| 10298  | -1 | 4638  |
| 10298  | 1  | 3985  |
| 10298  | 1  | 3984  |
| 4690   | 1  | 5881  |
| 4690   | 1  | 5880  |
| 4690   | 1  | 5879  |
| 4690   | 1  | 57144 |
| 4690   | 1  | 56924 |
| 4690   | 1  | 5063  |
| 4690   | 1  | 5062  |
| 4690   | 1  | 5058  |
| 4690   | 1  | 10298 |
| 1399   | 1  | 8503  |
| 1399   | 1  | 5296  |
| 1399   | 1  | 5295  |
| 1399   | 1  | 5294  |
| 1399   | 1  | 5293  |
| 1399   | 1  | 5291  |
| 1399   | 1  | 5290  |
| 1399   | 1  | 23533 |
| 1399   | 1  | 23433 |
| 1399   | 1  | 5829  |
| 1399   | 1  | 2889  |
| 1399   | 1  | 1793  |
| 1399   | 1  | 27    |
| 1399   | 1  | 25    |

|      |   |        |
|------|---|--------|
| 25   | 1 | 6464   |
| 25   | 1 | 53358  |
| 25   | 1 | 399694 |
| 25   | 1 | 25759  |
| 25   | 1 | 868    |
| 25   | 1 | 867    |
| 25   | 1 | 23624  |
| 25   | 1 | 1399   |
| 25   | 1 | 1398   |
| 25   | 1 | 2885   |
| 25   | 1 | 6777   |
| 25   | 1 | 6776   |
| 1398 | 1 | 8503   |
| 1398 | 1 | 5296   |
| 1398 | 1 | 5295   |
| 1398 | 1 | 5294   |
| 1398 | 1 | 5293   |
| 1398 | 1 | 5291   |
| 1398 | 1 | 5290   |
| 1398 | 1 | 23533  |
| 1398 | 1 | 23433  |
| 1398 | 1 | 5829   |
| 1398 | 1 | 2889   |
| 1398 | 1 | 1793   |
| 1398 | 1 | 27     |
| 1398 | 1 | 25     |
| 8503 | 1 | 5170   |
| 8503 | 1 | 7294   |
| 8503 | 1 | 3702   |
| 8503 | 1 | 5881   |
| 8503 | 1 | 5880   |
| 8503 | 1 | 5879   |
| 5296 | 1 | 5170   |
| 5296 | 1 | 7294   |
| 5296 | 1 | 3702   |
| 5296 | 1 | 5881   |
| 5296 | 1 | 5880   |
| 5296 | 1 | 5879   |
| 5295 | 1 | 5170   |
| 5295 | 1 | 7294   |
| 5295 | 1 | 3702   |
| 5295 | 1 | 5881   |
| 5295 | 1 | 5880   |
| 5295 | 1 | 5879   |
| 5294 | 1 | 5170   |
| 5294 | 1 | 7294   |
| 5294 | 1 | 3702   |
| 5294 | 1 | 5881   |
| 5294 | 1 | 5880   |
| 5294 | 1 | 5879   |
| 5293 | 1 | 5170   |
| 5293 | 1 | 7294   |
| 5293 | 1 | 3702   |
| 5293 | 1 | 5881   |
| 5293 | 1 | 5880   |

|       |    |        |
|-------|----|--------|
| 5293  | 1  | 5879   |
| 5291  | 1  | 5170   |
| 5291  | 1  | 7294   |
| 5291  | 1  | 3702   |
| 5291  | 1  | 5881   |
| 5291  | 1  | 5880   |
| 5291  | 1  | 5879   |
| 5290  | 1  | 5170   |
| 5290  | 1  | 7294   |
| 5290  | 1  | 3702   |
| 5290  | 1  | 5881   |
| 5290  | 1  | 5880   |
| 5290  | 1  | 5879   |
| 23533 | 1  | 5170   |
| 23533 | 1  | 7294   |
| 23533 | 1  | 3702   |
| 23533 | 1  | 5881   |
| 23533 | 1  | 5880   |
| 23533 | 1  | 5879   |
| 2064  | -1 | 1499   |
| 2064  | -1 | 1500   |
| 2064  | 1  | 6464   |
| 2064  | 1  | 53358  |
| 2064  | 1  | 399694 |
| 2064  | 1  | 25759  |
| 2064  | 1  | 3716   |
| 2064  | 1  | 5747   |
| 2064  | 1  | 5336   |
| 2064  | 1  | 5335   |
| 2064  | 1  | 8503   |
| 2064  | 1  | 5296   |
| 2064  | 1  | 5295   |
| 2064  | 1  | 5294   |
| 2064  | 1  | 5293   |
| 2064  | 1  | 5291   |
| 2064  | 1  | 5290   |
| 2064  | 1  | 23533  |
| 2064  | 1  | 2885   |
| 2885  | 1  | 9846   |
| 2885  | 1  | 2549   |
| 2885  | 1  | 6655   |
| 2885  | 1  | 6654   |
| 6714  | -1 | 1499   |
| 6714  | -1 | 387    |
| 6714  | 1  | 1956   |
| 6714  | 1  | 9855   |
| 6714  | 1  | 5747   |
| 6714  | 1  | 10746  |
| 6714  | 1  | 8503   |
| 6714  | 1  | 5296   |
| 6714  | 1  | 5295   |
| 6714  | 1  | 5294   |
| 6714  | 1  | 5293   |
| 6714  | 1  | 5291   |
| 6714  | 1  | 5290   |

|        |    |        |
|--------|----|--------|
| 6714   | 1  | 23533  |
| 145957 | 1  | 2066   |
| 10718  | 1  | 2066   |
| 9542   | 1  | 2066   |
| 9542   | 1  | 2065   |
| 2065   | 1  | 6464   |
| 2065   | 1  | 53358  |
| 2065   | 1  | 399694 |
| 2065   | 1  | 25759  |
| 2065   | 1  | 5336   |
| 2065   | 1  | 5335   |
| 2065   | 1  | 8503   |
| 2065   | 1  | 5296   |
| 2065   | 1  | 5295   |
| 2065   | 1  | 5294   |
| 2065   | 1  | 5293   |
| 2065   | 1  | 5291   |
| 2065   | 1  | 5290   |
| 2065   | 1  | 23533  |
| 2065   | 1  | 2885   |
| 3084   | 1  | 2066   |
| 3084   | 1  | 2065   |
| 2069   | 1  | 2066   |
| 2069   | 1  | 1956   |
| 1839   | 1  | 2066   |
| 1839   | 1  | 1956   |
| 2066   | 1  | 6777   |
| 2066   | 1  | 6776   |
| 2066   | 1  | 6464   |
| 2066   | 1  | 53358  |
| 2066   | 1  | 399694 |
| 2066   | 1  | 25759  |
| 2066   | 1  | 5336   |
| 2066   | 1  | 5335   |
| 2066   | 1  | 8503   |
| 2066   | 1  | 5296   |
| 2066   | 1  | 5295   |
| 2066   | 1  | 5294   |
| 2066   | 1  | 5293   |
| 2066   | 1  | 5291   |
| 2066   | 1  | 5290   |
| 2066   | 1  | 23533  |
| 2066   | 1  | 2885   |
| 685    | 1  | 2066   |
| 685    | 1  | 1956   |
| 374    | 1  | 1956   |
| 7039   | 1  | 5159   |
| 7039   | 1  | 5156   |
| 7039   | 1  | 3645   |
| 7039   | 1  | 3480   |
| 7039   | 1  | 2263   |
| 7039   | 1  | 2260   |
| 7039   | 1  | 2064   |
| 7039   | 1  | 1956   |
| 4616   | -1 | 983    |

|       |    |        |
|-------|----|--------|
| 4616  | -1 | 9133   |
| 4616  | -1 | 891    |
| 4616  | -1 | 85417  |
| 4616  | 1  | 5111   |
| 4616  | 1  | 4216   |
| 1647  | -1 | 983    |
| 1647  | -1 | 9133   |
| 1647  | -1 | 891    |
| 1647  | -1 | 85417  |
| 1647  | 1  | 5111   |
| 1647  | 1  | 4216   |
| 4216  | 1  | 650832 |
| 4216  | 1  | 5608   |
| 4216  | 1  | 5606   |
| 10912 | -1 | 983    |
| 10912 | -1 | 9133   |
| 10912 | -1 | 891    |
| 10912 | -1 | 85417  |
| 10912 | 1  | 5111   |
| 10912 | 1  | 4216   |
| 5062  | -1 | 91807  |
| 5062  | -1 | 85366  |
| 5062  | -1 | 4638   |
| 5062  | 1  | 3985   |
| 5062  | 1  | 3984   |
| 5058  | -1 | 91807  |
| 5058  | -1 | 85366  |
| 5058  | -1 | 4638   |
| 5058  | 1  | 5605   |
| 5058  | 1  | 3985   |
| 5058  | 1  | 3984   |
| 5058  | 1  | 9020   |
| 998   | 1  | 81624  |
| 998   | 1  | 128239 |
| 998   | 1  | 10788  |
| 998   | 1  | 84612  |
| 998   | 1  | 84552  |
| 998   | 1  | 50855  |
| 998   | 1  | 8826   |
| 998   | 1  | 7454   |
| 998   | 1  | 8976   |
| 998   | 1  | 6300   |
| 998   | 1  | 5603   |
| 998   | 1  | 5600   |
| 998   | 1  | 1432   |
| 998   | 1  | 57144  |
| 998   | 1  | 56924  |
| 998   | 1  | 5063   |
| 998   | 1  | 10298  |
| 998   | 1  | 5062   |
| 998   | 1  | 5058   |
| 998   | 1  | 4214   |
| 5881  | -1 | 26999  |
| 5881  | -1 | 23191  |
| 5881  | -1 | 3071   |

|      |    |        |
|------|----|--------|
| 5881 | -1 | 10787  |
| 5881 | -1 | 10152  |
| 5881 | 1  | 5970   |
| 5881 | 1  | 4790   |
| 5881 | 1  | 128239 |
| 5881 | 1  | 10788  |
| 5881 | 1  | 650832 |
| 5881 | 1  | 5608   |
| 5881 | 1  | 5606   |
| 5881 | 1  | 6416   |
| 5881 | 1  | 5609   |
| 5881 | 1  | 10458  |
| 5881 | 1  | 8936   |
| 5881 | 1  | 10810  |
| 5881 | 1  | 10163  |
| 5881 | 1  | 8826   |
| 5881 | 1  | 57144  |
| 5881 | 1  | 56924  |
| 5881 | 1  | 5063   |
| 5881 | 1  | 10298  |
| 5881 | 1  | 84448  |
| 5881 | 1  | 3983   |
| 5881 | 1  | 22885  |
| 5881 | 1  | 5602   |
| 5881 | 1  | 5601   |
| 5881 | 1  | 5599   |
| 5881 | 1  | 5062   |
| 5881 | 1  | 5058   |
| 5881 | 1  | 4214   |
| 5880 | -1 | 26999  |
| 5880 | -1 | 23191  |
| 5880 | -1 | 3071   |
| 5880 | -1 | 10787  |
| 5880 | -1 | 10152  |
| 5880 | 1  | 5970   |
| 5880 | 1  | 4790   |
| 5880 | 1  | 128239 |
| 5880 | 1  | 10788  |
| 5880 | 1  | 650832 |
| 5880 | 1  | 5608   |
| 5880 | 1  | 5606   |
| 5880 | 1  | 6416   |
| 5880 | 1  | 5609   |
| 5880 | 1  | 10458  |
| 5880 | 1  | 8936   |
| 5880 | 1  | 10810  |
| 5880 | 1  | 10163  |
| 5880 | 1  | 8826   |
| 5880 | 1  | 57144  |
| 5880 | 1  | 56924  |
| 5880 | 1  | 5063   |
| 5880 | 1  | 10298  |
| 5880 | 1  | 84448  |
| 5880 | 1  | 3983   |
| 5880 | 1  | 22885  |

|      |    |        |
|------|----|--------|
| 5880 | 1  | 5602   |
| 5880 | 1  | 5601   |
| 5880 | 1  | 5599   |
| 5880 | 1  | 5062   |
| 5880 | 1  | 5058   |
| 5880 | 1  | 4214   |
| 4214 | 1  | 5609   |
| 4214 | 1  | 650832 |
| 4214 | 1  | 5608   |
| 4214 | 1  | 5606   |
| 5879 | -1 | 26999  |
| 5879 | -1 | 23191  |
| 5879 | -1 | 3071   |
| 5879 | -1 | 10787  |
| 5879 | -1 | 10152  |
| 5879 | 1  | 5970   |
| 5879 | 1  | 4790   |
| 5879 | 1  | 128239 |
| 5879 | 1  | 10788  |
| 5879 | 1  | 4689   |
| 5879 | 1  | 653361 |
| 5879 | 1  | 4688   |
| 5879 | 1  | 1535   |
| 5879 | 1  | 50508  |
| 5879 | 1  | 27035  |
| 5879 | 1  | 1536   |
| 5879 | 1  | 650832 |
| 5879 | 1  | 5608   |
| 5879 | 1  | 5606   |
| 5879 | 1  | 6416   |
| 5879 | 1  | 5609   |
| 5879 | 1  | 10458  |
| 5879 | 1  | 8936   |
| 5879 | 1  | 10810  |
| 5879 | 1  | 10163  |
| 5879 | 1  | 8826   |
| 5879 | 1  | 57144  |
| 5879 | 1  | 56924  |
| 5879 | 1  | 5063   |
| 5879 | 1  | 10298  |
| 5879 | 1  | 84448  |
| 5879 | 1  | 3983   |
| 5879 | 1  | 22885  |
| 5879 | 1  | 5602   |
| 5879 | 1  | 5601   |
| 5879 | 1  | 5599   |
| 5879 | 1  | 5062   |
| 5879 | 1  | 5058   |
| 5879 | 1  | 4214   |
| 5894 | -1 | 572    |
| 6655 | 1  | 10125  |
| 6655 | 1  | 6237   |
| 6655 | 1  | 4893   |
| 6655 | 1  | 3845   |
| 6655 | 1  | 3265   |

|        |   |        |
|--------|---|--------|
| 6655   | 1 | 22808  |
| 6655   | 1 | 22800  |
| 6654   | 1 | 10125  |
| 6654   | 1 | 6237   |
| 6654   | 1 | 4893   |
| 6654   | 1 | 3845   |
| 6654   | 1 | 3265   |
| 6654   | 1 | 22808  |
| 6654   | 1 | 22800  |
| 1616   | 1 | 4217   |
| 7186   | 1 | 9020   |
| 7186   | 1 | 4214   |
| 7186   | 1 | 4217   |
| 7186   | 1 | 5871   |
| 836    | 1 | 1630   |
| 836    | 1 | 1676   |
| 836    | 1 | 839    |
| 836    | 1 | 4214   |
| 836    | 1 | 5062   |
| 836    | 1 | 5058   |
| 836    | 1 | 6789   |
| 836    | 1 | 6788   |
| 7043   | 1 | 91     |
| 7043   | 1 | 7048   |
| 7043   | 1 | 7046   |
| 7043   | 1 | 130399 |
| 7042   | 1 | 91     |
| 7042   | 1 | 7048   |
| 7042   | 1 | 7046   |
| 7042   | 1 | 130399 |
| 91     | 1 | 1616   |
| 7048   | 1 | 5519   |
| 7048   | 1 | 5518   |
| 7048   | 1 | 5516   |
| 7048   | 1 | 5515   |
| 7048   | 1 | 387    |
| 7048   | 1 | 1616   |
| 7046   | 1 | 1616   |
| 130399 | 1 | 1616   |
| 7040   | 1 | 91     |
| 7040   | 1 | 7048   |
| 7040   | 1 | 7046   |
| 7040   | 1 | 130399 |
| 355    | 1 | 8772   |
| 355    | 1 | 1616   |
| 356    | 1 | 8771   |
| 356    | 1 | 355    |
| 3553   | 1 | 3556   |
| 3553   | 1 | 7850   |
| 3553   | 1 | 3554   |
| 7850   | 1 | 836    |
| 3554   | 1 | 4615   |
| 3554   | 1 | 51135  |
| 3554   | 1 | 3656   |
| 3554   | 1 | 3654   |

|        |    |       |
|--------|----|-------|
| 3554   | 1  | 11213 |
| 3554   | 1  | 8717  |
| 3554   | 1  | 8772  |
| 3554   | 1  | 836   |
| 3552   | 1  | 3556  |
| 3552   | 1  | 7850  |
| 3552   | 1  | 3554  |
| 7132   | 1  | 1616  |
| 7132   | 1  | 8737  |
| 7132   | 1  | 8717  |
| 7132   | 1  | 8772  |
| 7132   | 1  | 7186  |
| 7132   | 1  | 836   |
| 7124   | 1  | 7133  |
| 7124   | 1  | 7132  |
| 5908   | -1 | 387   |
| 5908   | 1  | 5894  |
| 5908   | 1  | 369   |
| 5908   | 1  | 3684  |
| 5908   | 1  | 3689  |
| 5908   | 1  | 3683  |
| 5908   | 1  | 3676  |
| 5908   | 1  | 3688  |
| 5908   | 1  | 5602  |
| 5908   | 1  | 5601  |
| 5908   | 1  | 5599  |
| 5908   | 1  | 673   |
| 5906   | -1 | 387   |
| 5906   | 1  | 5894  |
| 5906   | 1  | 369   |
| 5906   | 1  | 3684  |
| 5906   | 1  | 3689  |
| 5906   | 1  | 3683  |
| 5906   | 1  | 3676  |
| 5906   | 1  | 3688  |
| 5906   | 1  | 5602  |
| 5906   | 1  | 5601  |
| 5906   | 1  | 5599  |
| 5906   | 1  | 673   |
| 25780  | 1  | 6237  |
| 25780  | 1  | 4893  |
| 25780  | 1  | 3845  |
| 25780  | 1  | 3265  |
| 25780  | 1  | 22808 |
| 25780  | 1  | 22800 |
| 115727 | 1  | 6237  |
| 115727 | 1  | 4893  |
| 115727 | 1  | 3845  |
| 115727 | 1  | 3265  |
| 115727 | 1  | 22808 |
| 115727 | 1  | 22800 |
| 10235  | 1  | 6237  |
| 10235  | 1  | 4893  |
| 10235  | 1  | 3845  |
| 10235  | 1  | 3265  |

|       |   |       |
|-------|---|-------|
| 10235 | 1 | 22808 |
| 10235 | 1 | 22800 |
| 10125 | 1 | 6237  |
| 10125 | 1 | 4893  |
| 10125 | 1 | 3845  |
| 10125 | 1 | 3265  |
| 10125 | 1 | 22808 |
| 10125 | 1 | 22800 |
| 5924  | 1 | 6237  |
| 5924  | 1 | 4893  |
| 5924  | 1 | 3845  |
| 5924  | 1 | 3265  |
| 5924  | 1 | 22808 |
| 5924  | 1 | 22800 |
| 5923  | 1 | 6237  |
| 5923  | 1 | 4893  |
| 5923  | 1 | 3845  |
| 5923  | 1 | 3265  |
| 5923  | 1 | 22808 |
| 5923  | 1 | 22800 |
| 6237  | 1 | 9459  |
| 6237  | 1 | 8503  |
| 6237  | 1 | 5296  |
| 6237  | 1 | 5295  |
| 6237  | 1 | 5294  |
| 6237  | 1 | 5293  |
| 6237  | 1 | 5291  |
| 6237  | 1 | 5290  |
| 6237  | 1 | 23533 |
| 6237  | 1 | 369   |
| 6237  | 1 | 4301  |
| 6237  | 1 | 4342  |
| 6237  | 1 | 5894  |
| 6237  | 1 | 673   |
| 4893  | 1 | 5900  |
| 4893  | 1 | 11186 |
| 4893  | 1 | 9459  |
| 4893  | 1 | 8503  |
| 4893  | 1 | 5296  |
| 4893  | 1 | 5295  |
| 4893  | 1 | 5294  |
| 4893  | 1 | 5293  |
| 4893  | 1 | 5291  |
| 4893  | 1 | 5290  |
| 4893  | 1 | 23533 |
| 4893  | 1 | 4301  |
| 4893  | 1 | 369   |
| 4893  | 1 | 4342  |
| 4893  | 1 | 5894  |
| 4893  | 1 | 673   |
| 3845  | 1 | 5900  |
| 3845  | 1 | 11186 |
| 3845  | 1 | 9459  |
| 3845  | 1 | 8503  |
| 3845  | 1 | 5296  |

|       |   |       |
|-------|---|-------|
| 3845  | 1 | 5295  |
| 3845  | 1 | 5294  |
| 3845  | 1 | 5293  |
| 3845  | 1 | 5291  |
| 3845  | 1 | 5290  |
| 3845  | 1 | 23533 |
| 3845  | 1 | 4301  |
| 3845  | 1 | 369   |
| 3845  | 1 | 4342  |
| 3845  | 1 | 5894  |
| 3845  | 1 | 673   |
| 3265  | 1 | 5900  |
| 3265  | 1 | 11186 |
| 3265  | 1 | 9459  |
| 3265  | 1 | 4301  |
| 3265  | 1 | 8503  |
| 3265  | 1 | 5296  |
| 3265  | 1 | 5295  |
| 3265  | 1 | 5294  |
| 3265  | 1 | 5293  |
| 3265  | 1 | 5291  |
| 3265  | 1 | 5290  |
| 3265  | 1 | 23533 |
| 3265  | 1 | 369   |
| 3265  | 1 | 4342  |
| 3265  | 1 | 5894  |
| 3265  | 1 | 673   |
| 22808 | 1 | 9459  |
| 22808 | 1 | 8503  |
| 22808 | 1 | 5296  |
| 22808 | 1 | 5295  |
| 22808 | 1 | 5294  |
| 22808 | 1 | 5293  |
| 22808 | 1 | 5291  |
| 22808 | 1 | 5290  |
| 22808 | 1 | 23533 |
| 22808 | 1 | 369   |
| 22808 | 1 | 4301  |
| 22808 | 1 | 4342  |
| 22808 | 1 | 5894  |
| 22808 | 1 | 673   |
| 22800 | 1 | 9459  |
| 22800 | 1 | 8503  |
| 22800 | 1 | 5296  |
| 22800 | 1 | 5295  |
| 22800 | 1 | 5294  |
| 22800 | 1 | 5293  |
| 22800 | 1 | 5291  |
| 22800 | 1 | 5290  |
| 22800 | 1 | 23533 |
| 22800 | 1 | 369   |
| 22800 | 1 | 4301  |
| 22800 | 1 | 4342  |
| 22800 | 1 | 5894  |
| 22800 | 1 | 673   |

|       |    |       |
|-------|----|-------|
| 9693  | 1  | 6237  |
| 9693  | 1  | 4893  |
| 9693  | 1  | 3845  |
| 9693  | 1  | 3265  |
| 9693  | 1  | 22808 |
| 9693  | 1  | 22800 |
| 55970 | 1  | 57144 |
| 55970 | 1  | 56924 |
| 55970 | 1  | 5063  |
| 55970 | 1  | 5062  |
| 55970 | 1  | 5058  |
| 55970 | 1  | 10298 |
| 55970 | 1  | 89846 |
| 55970 | 1  | 2245  |
| 55970 | 1  | 5922  |
| 5922  | -1 | 6237  |
| 5922  | -1 | 4893  |
| 5922  | -1 | 3845  |
| 5922  | -1 | 3265  |
| 5922  | -1 | 22808 |
| 5922  | -1 | 22800 |
| 2768  | 1  | 9138  |
| 2768  | 1  | 23365 |
| 2768  | 1  | 8681  |
| 2768  | 1  | 84647 |
| 2768  | 1  | 8399  |
| 2768  | 1  | 8398  |
| 2768  | 1  | 81579 |
| 2768  | 1  | 64600 |
| 2768  | 1  | 5322  |
| 2768  | 1  | 5321  |
| 2768  | 1  | 5320  |
| 2768  | 1  | 5319  |
| 2768  | 1  | 50487 |
| 2768  | 1  | 30814 |
| 2768  | 1  | 26279 |
| 2768  | 1  | 1E+08 |
| 2768  | 1  | 5922  |
| 5155  | 1  | 3645  |
| 5155  | 1  | 2263  |
| 5155  | 1  | 2260  |
| 5155  | 1  | 4233  |
| 5155  | 1  | 3791  |
| 5155  | 1  | 3480  |
| 5155  | 1  | 2324  |
| 5155  | 1  | 2321  |
| 5155  | 1  | 2064  |
| 5155  | 1  | 1956  |
| 5155  | 1  | 5159  |
| 5155  | 1  | 5156  |
| 5159  | 1  | 4893  |
| 5159  | 1  | 3845  |
| 5159  | 1  | 3265  |
| 5159  | 1  | 6655  |
| 5159  | 1  | 6654  |

|      |   |        |
|------|---|--------|
| 5159 | 1 | 6714   |
| 5159 | 1 | 2885   |
| 5159 | 1 | 6464   |
| 5159 | 1 | 53358  |
| 5159 | 1 | 399694 |
| 5159 | 1 | 25759  |
| 5159 | 1 | 8503   |
| 5159 | 1 | 5296   |
| 5159 | 1 | 5295   |
| 5159 | 1 | 5294   |
| 5159 | 1 | 5293   |
| 5159 | 1 | 5291   |
| 5159 | 1 | 5290   |
| 5159 | 1 | 23533  |
| 5159 | 1 | 5747   |
| 5159 | 1 | 5336   |
| 5159 | 1 | 5335   |
| 5156 | 1 | 4893   |
| 5156 | 1 | 3845   |
| 5156 | 1 | 3265   |
| 5156 | 1 | 6655   |
| 5156 | 1 | 6654   |
| 5156 | 1 | 6714   |
| 5156 | 1 | 2885   |
| 5156 | 1 | 6464   |
| 5156 | 1 | 53358  |
| 5156 | 1 | 399694 |
| 5156 | 1 | 25759  |
| 5156 | 1 | 8503   |
| 5156 | 1 | 5296   |
| 5156 | 1 | 5295   |
| 5156 | 1 | 5294   |
| 5156 | 1 | 5293   |
| 5156 | 1 | 5291   |
| 5156 | 1 | 5290   |
| 5156 | 1 | 23533  |
| 5156 | 1 | 5747   |
| 5156 | 1 | 5336   |
| 5156 | 1 | 5335   |
| 5154 | 1 | 3645   |
| 5154 | 1 | 2263   |
| 5154 | 1 | 2260   |
| 5154 | 1 | 4233   |
| 5154 | 1 | 3791   |
| 5154 | 1 | 3480   |
| 5154 | 1 | 2324   |
| 5154 | 1 | 2321   |
| 5154 | 1 | 2064   |
| 5154 | 1 | 1956   |
| 5154 | 1 | 5159   |
| 5154 | 1 | 5156   |
| 9965 | 1 | 5159   |
| 9965 | 1 | 5156   |
| 9965 | 1 | 4233   |
| 9965 | 1 | 3480   |

|       |   |      |
|-------|---|------|
| 9965  | 1 | 1956 |
| 9965  | 1 | 2264 |
| 9965  | 1 | 2263 |
| 9965  | 1 | 2261 |
| 9965  | 1 | 2260 |
| 8823  | 1 | 5159 |
| 8823  | 1 | 5156 |
| 8823  | 1 | 4233 |
| 8823  | 1 | 3480 |
| 8823  | 1 | 1956 |
| 8823  | 1 | 2264 |
| 8823  | 1 | 2263 |
| 8823  | 1 | 2261 |
| 8823  | 1 | 2260 |
| 8822  | 1 | 5159 |
| 8822  | 1 | 5156 |
| 8822  | 1 | 4233 |
| 8822  | 1 | 3480 |
| 8822  | 1 | 1956 |
| 8822  | 1 | 2264 |
| 8822  | 1 | 2263 |
| 8822  | 1 | 2261 |
| 8822  | 1 | 2260 |
| 8817  | 1 | 5159 |
| 8817  | 1 | 5156 |
| 8817  | 1 | 4233 |
| 8817  | 1 | 3480 |
| 8817  | 1 | 1956 |
| 8817  | 1 | 2264 |
| 8817  | 1 | 2263 |
| 8817  | 1 | 2261 |
| 8817  | 1 | 2260 |
| 8074  | 1 | 5159 |
| 8074  | 1 | 5156 |
| 8074  | 1 | 4233 |
| 8074  | 1 | 3480 |
| 8074  | 1 | 1956 |
| 8074  | 1 | 2264 |
| 8074  | 1 | 2263 |
| 8074  | 1 | 2261 |
| 8074  | 1 | 2260 |
| 27006 | 1 | 5159 |
| 27006 | 1 | 5156 |
| 27006 | 1 | 4233 |
| 27006 | 1 | 3480 |
| 27006 | 1 | 1956 |
| 27006 | 1 | 2264 |
| 27006 | 1 | 2263 |
| 27006 | 1 | 2261 |
| 27006 | 1 | 2260 |
| 26291 | 1 | 5159 |
| 26291 | 1 | 5156 |
| 26291 | 1 | 4233 |
| 26291 | 1 | 3480 |
| 26291 | 1 | 1956 |

|       |   |      |
|-------|---|------|
| 26291 | 1 | 2264 |
| 26291 | 1 | 2263 |
| 26291 | 1 | 2261 |
| 26291 | 1 | 2260 |
| 26281 | 1 | 5159 |
| 26281 | 1 | 5156 |
| 26281 | 1 | 4233 |
| 26281 | 1 | 3480 |
| 26281 | 1 | 1956 |
| 26281 | 1 | 2264 |
| 26281 | 1 | 2263 |
| 26281 | 1 | 2261 |
| 26281 | 1 | 2260 |
| 2259  | 1 | 5159 |
| 2259  | 1 | 5156 |
| 2259  | 1 | 4233 |
| 2259  | 1 | 3480 |
| 2259  | 1 | 1956 |
| 2259  | 1 | 2264 |
| 2259  | 1 | 2263 |
| 2259  | 1 | 2261 |
| 2259  | 1 | 2260 |
| 2258  | 1 | 5159 |
| 2258  | 1 | 5156 |
| 2258  | 1 | 4233 |
| 2258  | 1 | 3480 |
| 2258  | 1 | 1956 |
| 2258  | 1 | 2264 |
| 2258  | 1 | 2263 |
| 2258  | 1 | 2261 |
| 2258  | 1 | 2260 |
| 2257  | 1 | 5159 |
| 2257  | 1 | 5156 |
| 2257  | 1 | 4233 |
| 2257  | 1 | 3480 |
| 2257  | 1 | 1956 |
| 2257  | 1 | 2264 |
| 2257  | 1 | 2263 |
| 2257  | 1 | 2261 |
| 2257  | 1 | 2260 |
| 2256  | 1 | 5159 |
| 2256  | 1 | 5156 |
| 2256  | 1 | 4233 |
| 2256  | 1 | 3480 |
| 2256  | 1 | 1956 |
| 2256  | 1 | 2264 |
| 2256  | 1 | 2263 |
| 2256  | 1 | 2261 |
| 2256  | 1 | 2260 |
| 2255  | 1 | 5159 |
| 2255  | 1 | 5156 |
| 2255  | 1 | 4233 |
| 2255  | 1 | 3480 |
| 2255  | 1 | 1956 |
| 2255  | 1 | 2264 |

|      |   |      |
|------|---|------|
| 2255 | 1 | 2263 |
| 2255 | 1 | 2261 |
| 2255 | 1 | 2260 |
| 2254 | 1 | 5159 |
| 2254 | 1 | 5156 |
| 2254 | 1 | 4233 |
| 2254 | 1 | 3480 |
| 2254 | 1 | 1956 |
| 2254 | 1 | 2264 |
| 2254 | 1 | 2263 |
| 2254 | 1 | 2261 |
| 2254 | 1 | 2260 |
| 2253 | 1 | 5159 |
| 2253 | 1 | 5156 |
| 2253 | 1 | 4233 |
| 2253 | 1 | 3480 |
| 2253 | 1 | 1956 |
| 2253 | 1 | 2264 |
| 2253 | 1 | 2263 |
| 2253 | 1 | 2261 |
| 2253 | 1 | 2260 |
| 2252 | 1 | 5159 |
| 2252 | 1 | 5156 |
| 2252 | 1 | 4233 |
| 2252 | 1 | 3480 |
| 2252 | 1 | 1956 |
| 2252 | 1 | 2264 |
| 2252 | 1 | 2263 |
| 2252 | 1 | 2261 |
| 2252 | 1 | 2260 |
| 2251 | 1 | 5159 |
| 2251 | 1 | 5156 |
| 2251 | 1 | 4233 |
| 2251 | 1 | 3480 |
| 2251 | 1 | 1956 |
| 2251 | 1 | 2264 |
| 2251 | 1 | 2263 |
| 2251 | 1 | 2261 |
| 2251 | 1 | 2260 |
| 2250 | 1 | 5159 |
| 2250 | 1 | 5156 |
| 2250 | 1 | 4233 |
| 2250 | 1 | 3480 |
| 2250 | 1 | 1956 |
| 2250 | 1 | 2264 |
| 2250 | 1 | 2263 |
| 2250 | 1 | 2261 |
| 2250 | 1 | 2260 |
| 2249 | 1 | 5159 |
| 2249 | 1 | 5156 |
| 2249 | 1 | 4233 |
| 2249 | 1 | 3480 |
| 2249 | 1 | 1956 |
| 2249 | 1 | 2264 |
| 2249 | 1 | 2263 |

|      |   |       |
|------|---|-------|
| 2249 | 1 | 2261  |
| 2249 | 1 | 2260  |
| 2248 | 1 | 5159  |
| 2248 | 1 | 5156  |
| 2248 | 1 | 4233  |
| 2248 | 1 | 3480  |
| 2248 | 1 | 1956  |
| 2248 | 1 | 2264  |
| 2248 | 1 | 2263  |
| 2248 | 1 | 2261  |
| 2248 | 1 | 2260  |
| 2247 | 1 | 5159  |
| 2247 | 1 | 5156  |
| 2247 | 1 | 4233  |
| 2247 | 1 | 3480  |
| 2247 | 1 | 1956  |
| 2247 | 1 | 2264  |
| 2247 | 1 | 2263  |
| 2247 | 1 | 2261  |
| 2247 | 1 | 2260  |
| 2264 | 1 | 6655  |
| 2264 | 1 | 6654  |
| 2263 | 1 | 8503  |
| 2263 | 1 | 5296  |
| 2263 | 1 | 5295  |
| 2263 | 1 | 5294  |
| 2263 | 1 | 5293  |
| 2263 | 1 | 5291  |
| 2263 | 1 | 5290  |
| 2263 | 1 | 23533 |
| 2263 | 1 | 2885  |
| 2263 | 1 | 6655  |
| 2263 | 1 | 6654  |
| 2261 | 1 | 2885  |
| 2261 | 1 | 6655  |
| 2261 | 1 | 6654  |
| 2260 | 1 | 4893  |
| 2260 | 1 | 3845  |
| 2260 | 1 | 3265  |
| 2260 | 1 | 8503  |
| 2260 | 1 | 5296  |
| 2260 | 1 | 5295  |
| 2260 | 1 | 5294  |
| 2260 | 1 | 5293  |
| 2260 | 1 | 5291  |
| 2260 | 1 | 5290  |
| 2260 | 1 | 23533 |
| 2260 | 1 | 2885  |
| 2260 | 1 | 6655  |
| 2260 | 1 | 6654  |
| 2246 | 1 | 5159  |
| 2246 | 1 | 5156  |
| 2246 | 1 | 4233  |
| 2246 | 1 | 3480  |
| 2246 | 1 | 1956  |

|      |    |        |
|------|----|--------|
| 2246 | 1  | 2264   |
| 2246 | 1  | 2263   |
| 2246 | 1  | 2261   |
| 2246 | 1  | 2260   |
| 1956 | -1 | 1499   |
| 1956 | -1 | 1500   |
| 1956 | 1  | 6464   |
| 1956 | 1  | 53358  |
| 1956 | 1  | 399694 |
| 1956 | 1  | 25759  |
| 1956 | 1  | 1399   |
| 1956 | 1  | 1398   |
| 1956 | 1  | 6777   |
| 1956 | 1  | 6776   |
| 1956 | 1  | 868    |
| 1956 | 1  | 867    |
| 1956 | 1  | 23624  |
| 1956 | 1  | 5336   |
| 1956 | 1  | 5335   |
| 1956 | 1  | 4893   |
| 1956 | 1  | 3845   |
| 1956 | 1  | 3265   |
| 1956 | 1  | 3716   |
| 1956 | 1  | 6655   |
| 1956 | 1  | 6654   |
| 1956 | 1  | 8503   |
| 1956 | 1  | 5296   |
| 1956 | 1  | 5295   |
| 1956 | 1  | 5294   |
| 1956 | 1  | 5293   |
| 1956 | 1  | 5291   |
| 1956 | 1  | 5290   |
| 1956 | 1  | 23533  |
| 1956 | 1  | 5747   |
| 1956 | 1  | 2885   |
| 1956 | 1  | 6714   |
| 1950 | 1  | 3645   |
| 1950 | 1  | 2263   |
| 1950 | 1  | 2260   |
| 1950 | 1  | 5159   |
| 1950 | 1  | 5156   |
| 1950 | 1  | 4233   |
| 1950 | 1  | 3791   |
| 1950 | 1  | 3480   |
| 1950 | 1  | 2324   |
| 1950 | 1  | 2321   |
| 1950 | 1  | 2064   |
| 1950 | 1  | 1956   |

**Table S2.** KEGG-HPO associated. Degree of pleiotropy here represents the number of associated phenotypes from HPO database.

| Entrez Gene ID | Gene Name | Degree of pleiotropy |
|----------------|-----------|----------------------|
| 10000          | AKT3      | 126                  |
| 10095          | ARPC1B    | 56                   |
| 10125          | RASGRP1   | 285                  |
| 1019           | CDK4      | 79                   |
| 102            | ADAM10    | 9                    |
| 1020           | CDK5      | 102                  |
| 1021           | CDK6      | 102                  |
| 10235          | RASGRP2   | 22                   |
| 1026           | CDKN1A    | 168                  |
| 1027           | CDKN1B    | 211                  |
| 1028           | CDKN1C    | 297                  |
| 1029           | CDKN2A    | 196                  |
| 10297          | APC2      | 272                  |
| 1030           | CDKN2B    | 200                  |
| 1031           | CDKN2C    | 168                  |
| 10319          | LAMC3     | 35                   |
| 10452          | TOMM40    | 84                   |
| 1050           | CEBPA     | 16                   |
| 10683          | DLL3      | 234                  |
| 107            | ADCY1     | 13                   |
| 1073           | CFL2      | 207                  |
| 1080           | CFTR      | 281                  |
| 10842          | PPP1R17   | 34                   |
| 10892          | MALT1     | 106                  |
| 109            | ADCY3     | 26                   |
| 111            | ADCY5     | 79                   |
| 112            | ADCY6     | 62                   |
| 1131           | CHRM3     | 188                  |
| 114609         | TIRAP     | 15                   |
| 1147           | CHUK      | 86                   |
| 1277           | COL1A1    | 606                  |
| 1278           | COL1A2    | 374                  |
| 1280           | COL2A1    | 864                  |
| 1281           | COL3A1    | 563                  |
| 1282           | COL4A1    | 374                  |
| 1284           | COL4A2    | 47                   |
| 1286           | COL4A4    | 79                   |
| 1288           | COL4A6    | 15                   |
| 1289           | COL5A1    | 364                  |
| 1290           | COL5A2    | 332                  |
| 1291           | COL6A1    | 302                  |
| 1292           | COL6A2    | 327                  |
| 1293           | COL6A3    | 325                  |

|        |         |     |
|--------|---------|-----|
| 1301   | COL11A1 | 532 |
| 1302   | COL11A2 | 394 |
| 1311   | COMP    | 275 |
| 1385   | CREB1   | 7   |
| 1387   | CREBBP  | 572 |
| 1399   | CRKL    | 320 |
| 1407   | CRY1    | 8   |
| 1438   | CSF2RA  | 71  |
| 1439   | CSF2RB  | 72  |
| 1441   | CSF3R   | 19  |
| 1453   | CSNK1D  | 17  |
| 1457   | CSNK2A1 | 170 |
| 148022 | TICAM1  | 12  |
| 1487   | CTBP1   | 491 |
| 149233 | IL23R   | 287 |
| 1493   | CTLA4   | 427 |
| 1499   | CTNNB1  | 491 |
| 1500   | CTNND1  | 101 |
| 1535   | CYBA    | 196 |
| 1536   | CYBB    | 203 |
| 154    | ADRB2   | 28  |
| 155    | ADRB3   | 20  |
| 1605   | DAG1    | 283 |
| 1616   | DAXX    | 136 |
| 1630   | DCC     | 296 |
| 1634   | DCN     | 24  |
| 1729   | DIAPH1  | 82  |
| 1730   | DIAPH2  | 21  |
| 1813   | DRD2    | 35  |
| 1816   | DRD5    | 30  |
| 182    | JAG1    | 355 |
| 1848   | DUSP6   | 286 |
| 185    | AGTR1   | 77  |
| 1855   | DVL1    | 494 |
| 1857   | DVL3    | 526 |
| 1906   | EDN1    | 177 |
| 1909   | EDNRA   | 159 |
| 1910   | EDNRB   | 232 |
| 1947   | EFNB1   | 325 |
| 1950   | EGF     | 84  |
| 1956   | EGFR    | 90  |
| 1969   | EPHA2   | 23  |
| 2      | A2M     | 34  |
| 200576 | PIKFYVE | 16  |
| 2033   | EP300   | 627 |
| 2043   | EPHA4   | 83  |
| 2048   | EPHB2   | 18  |

|       |         |      |
|-------|---------|------|
| 2050  | EPHB4   | 80   |
| 2056  | EPO     | 19   |
| 2057  | EPOR    | 52   |
| 2064  | ERBB2   | 54   |
| 2065  | ERBB3   | 121  |
| 2066  | ERBB4   | 98   |
| 207   | AKT1    | 693  |
| 208   | AKT2    | 128  |
| 2122  | MECOM   | 90   |
| 2147  | F2      | 146  |
| 2153  | F5      | 171  |
| 2155  | F7      | 90   |
| 2157  | F8      | 37   |
| 2158  | F9      | 49   |
| 2159  | F10     | 112  |
| 2160  | F11     | 50   |
| 2161  | F12     | 59   |
| 2162  | F13A1   | 157  |
| 2165  | F13B    | 134  |
| 2206  | MS4A2   | 36   |
| 2243  | FGA     | 124  |
| 2244  | FGB     | 78   |
| 2245  | FGD1    | 321  |
| 2248  | FGF3    | 226  |
| 2250  | FGF5    | 23   |
| 2253  | FGF8    | 408  |
| 2254  | FGF9    | 141  |
| 2255  | FGF10   | 250  |
| 2257  | FGF12   | 216  |
| 2259  | FGF14   | 107  |
| 2260  | FGFR1   | 1043 |
| 2261  | FGFR3   | 1010 |
| 2263  | FGFR2   | 1137 |
| 2266  | FGG     | 78   |
| 22926 | ATF6    | 82   |
| 2308  | FOXO1   | 14   |
| 2322  | FLT3    | 21   |
| 23236 | PLCB1   | 48   |
| 2324  | FLT4    | 125  |
| 2335  | FN1     | 186  |
| 23385 | NCSTN   | 19   |
| 23396 | PIP5K1C | 26   |
| 23529 | CLCF1   | 179  |
| 2353  | FOS     | 312  |
| 23533 | PIK3R5  | 127  |
| 2475  | MTOR    | 333  |
| 2488  | FSHB    | 117  |

|        |          |     |
|--------|----------|-----|
| 2492   | FSHR     | 186 |
| 25     | ABL1     | 234 |
| 2535   | FZD2     | 427 |
| 2549   | GAB1     | 11  |
| 26281  | FGF20    | 113 |
| 268    | AMH      | 35  |
| 2688   | GH1      | 46  |
| 269    | AMHR2    | 35  |
| 2690   | GHR      | 207 |
| 2697   | GJA1     | 769 |
| 26999  | CYFIP2   | 207 |
| 27040  | LAT      | 49  |
| 2735   | GLI1     | 244 |
| 2736   | GLI2     | 407 |
| 2737   | GLI3     | 714 |
| 2767   | GNA11    | 245 |
| 2771   | GNAI2    | 20  |
| 2773   | GNAI3    | 193 |
| 2774   | GNAL     | 28  |
| 2775   | GNAO1    | 278 |
| 2776   | GNAQ     | 286 |
| 2778   | GNAS     | 638 |
| 2782   | GNB1     | 153 |
| 2784   | GNB3     | 55  |
| 2796   | GNRH1    | 198 |
| 2798   | GNRHR    | 184 |
| 2811   | GP1BA    | 194 |
| 2812   | GP1BB    | 638 |
| 2815   | GP9      | 119 |
| 284217 | LAMA1    | 84  |
| 28514  | DLL1     | 189 |
| 2892   | GRIA3    | 69  |
| 2911   | GRM1     | 137 |
| 29110  | TBK1     | 242 |
| 2934   | GSN      | 219 |
| 29851  | ICOS     | 204 |
| 2997   | GYS1     | 40  |
| 2998   | GYS2     | 70  |
| 3053   | SERPIND1 | 22  |
| 3082   | HGF      | 13  |
| 31     | ACACA    | 14  |
| 3105   | HLA-A    | 90  |
| 3106   | HLA-B    | 456 |
| 3107   | HLA-C    | 25  |
| 3135   | HLA-G    | 11  |
| 324    | APC      | 669 |
| 3265   | HRAS     | 679 |

|      |         |     |
|------|---------|-----|
| 330  | BIRC3   | 84  |
| 331  | XIAP    | 164 |
| 3339 | HSPG2   | 549 |
| 3356 | HTR2A   | 43  |
| 3371 | TNC     | 7   |
| 3455 | IFNAR2  | 8   |
| 3458 | IFNG    | 212 |
| 3459 | IFNGR1  | 143 |
| 3460 | IFNGR2  | 11  |
| 3479 | IGF1    | 205 |
| 3480 | IGF1R   | 261 |
| 3516 | RBPJ    | 264 |
| 355  | FAS     | 556 |
| 3551 | IKBKB   | 61  |
| 3553 | IL1B    | 34  |
| 3559 | IL2RA   | 167 |
| 356  | FASLG   | 319 |
| 3560 | IL2RB   | 68  |
| 3561 | IL2RG   | 273 |
| 3566 | IL4R    | 36  |
| 3569 | IL6     | 180 |
| 3574 | IL7     | 45  |
| 3575 | IL7R    | 175 |
| 3586 | IL10    | 293 |
| 3587 | IL10RA  | 48  |
| 3588 | IL10RB  | 49  |
| 3590 | IL11RA  | 92  |
| 3592 | IL12A   | 395 |
| 3593 | IL12B   | 145 |
| 3594 | IL12RB1 | 149 |
| 3596 | IL13    | 11  |
| 3624 | INHBA   | 103 |
| 3630 | INS     | 269 |
| 3643 | INSR    | 369 |
| 3654 | IRAK1   | 186 |
| 3655 | ITGA6   | 164 |
| 3661 | IRF3    | 22  |
| 3663 | IRF5    | 258 |
| 3665 | IRF7    | 6   |
| 3667 | IRS1    | 22  |
| 3673 | ITGA2   | 95  |
| 3674 | ITGA2B  | 158 |
| 3675 | ITGA3   | 158 |
| 3679 | ITGA7   | 251 |
| 3689 | ITGB2   | 65  |
| 3690 | ITGB3   | 158 |
| 3691 | ITGB4   | 266 |

|        |          |      |
|--------|----------|------|
| 3694   | ITGB6    | 152  |
| 3702   | ITK      | 77   |
| 3717   | JAK2     | 331  |
| 3718   | JAK3     | 173  |
| 3745   | KCNB1    | 193  |
| 375790 | AGRN     | 364  |
| 3784   | KCNQ1    | 279  |
| 3791   | KDR      | 10   |
| 3815   | KIT      | 314  |
| 3818   | KLKB1    | 6    |
| 3845   | KRAS     | 1153 |
| 3908   | LAMA2    | 278  |
| 3909   | LAMA3    | 240  |
| 3910   | LAMA4    | 54   |
| 3912   | LAMB1    | 109  |
| 3913   | LAMB2    | 296  |
| 3914   | LAMB3    | 239  |
| 3918   | LAMC2    | 224  |
| 392255 | GDF6     | 285  |
| 3932   | LCK      | 49   |
| 3952   | LEP      | 161  |
| 3953   | LEPR     | 164  |
| 3955   | LFNG     | 215  |
| 3972   | LHB      | 74   |
| 3973   | LHCGR    | 85   |
| 3977   | LIFR     | 372  |
| 3984   | LIMK1    | 734  |
| 3991   | LIPE     | 117  |
| 4068   | SH2D1A   | 111  |
| 4088   | SMAD3    | 400  |
| 4089   | SMAD4    | 707  |
| 4091   | SMAD6    | 77   |
| 4092   | SMAD7    | 15   |
| 4093   | SMAD9    | 21   |
| 4149   | MAX      | 242  |
| 4157   | MC1R     | 149  |
| 4193   | MDM2     | 70   |
| 4214   | MAP3K1   | 202  |
| 4233   | MET      | 111  |
| 4254   | KITLG    | 98   |
| 4261   | CIITA    | 230  |
| 4286   | MITF     | 305  |
| 4313   | MMP2     | 250  |
| 4352   | MPL      | 309  |
| 4609   | MYC      | 93   |
| 4615   | MYD88    | 235  |
| 462    | SERPINC1 | 66   |

|       |           |     |
|-------|-----------|-----|
| 4633  | MYL2      | 273 |
| 4638  | MYLK      | 259 |
| 4688  | NCF2      | 190 |
| 4689  | NCF4      | 148 |
| 4747  | NEFL      | 183 |
| 4763  | NF1       | 383 |
| 4790  | NFKB1     | 157 |
| 4792  | NFKBIA    | 83  |
| 4838  | NODAL     | 213 |
| 4846  | NOS3      | 89  |
| 4851  | NOTCH1    | 331 |
| 4853  | NOTCH2    | 537 |
| 4854  | NOTCH3    | 530 |
| 487   | ATP2A1    | 6   |
| 488   | ATP2A2    | 87  |
| 4893  | NRAS      | 743 |
| 4982  | TNFRSF11B | 177 |
| 5054  | SERPINE1  | 22  |
| 5058  | PAK1      | 118 |
| 50615 | IL21R     | 67  |
| 5063  | PAK3      | 262 |
| 5111  | PCNA      | 105 |
| 51135 | IRAK4     | 31  |
| 51206 | GP6       | 46  |
| 5137  | PDE1C     | 7   |
| 5139  | PDE3A     | 45  |
| 51422 | PRKAG2    | 130 |
| 5155  | PDGFB     | 467 |
| 5156  | PDGFRA    | 138 |
| 5159  | PDGFRB    | 440 |
| 51744 | CD244     | 20  |
| 5216  | PFN1      | 99  |
| 5255  | PHKA1     | 37  |
| 5256  | PHKA2     | 39  |
| 5257  | PHKB      | 35  |
| 5261  | PHKG2     | 65  |
| 5265  | SERPINA1  | 60  |
| 5290  | PIK3CA    | 750 |
| 5293  | PIK3CD    | 81  |
| 5295  | PIK3R1    | 411 |
| 5296  | PIK3R2    | 185 |
| 5327  | PLAT      | 11  |
| 5328  | PLAU      | 81  |
| 5332  | PLCB4     | 182 |
| 5336  | PLCG2     | 105 |
| 5337  | PLD1      | 74  |
| 5340  | PLG       | 218 |

|       |          |     |
|-------|----------|-----|
| 5345  | SERPINF2 | 73  |
| 5350  | PLN      | 81  |
| 5371  | PML      | 167 |
| 54205 | CYCS     | 7   |
| 54361 | WNT4     | 232 |
| 5443  | POMC     | 119 |
| 54567 | DLL4     | 293 |
| 5495  | PPM1B    | 108 |
| 5500  | PPP1CB   | 299 |
| 5506  | PPP1R3A  | 22  |
| 5515  | PPP2CA   | 153 |
| 5518  | PPP2R1A  | 153 |
| 5519  | PPP2R1B  | 18  |
| 5521  | PPP2R2B  | 106 |
| 5530  | PPP3CA   | 265 |
| 5566  | PRKACA   | 132 |
| 5568  | PRKACG   | 42  |
| 5573  | PRKAR1A  | 794 |
| 5575  | PRKAR1B  | 68  |
| 5580  | PRKCD    | 362 |
| 5582  | PRKCG    | 121 |
| 5583  | PRKCH    | 9   |
| 55851 | PSENEN   | 37  |
| 5591  | PRKDC    | 153 |
| 5592  | PRKG1    | 193 |
| 5594  | MAPK1    | 320 |
| 5602  | MAPK10   | 58  |
| 5604  | MAP2K1   | 477 |
| 5605  | MAP2K2   | 413 |
| 5618  | PRLR     | 72  |
| 5624  | PROC     | 89  |
| 5627  | PROS1    | 87  |
| 5644  | PRSS1    | 99  |
| 5645  | PRSS2    | 86  |
| 5649  | RELN     | 81  |
| 5663  | PSEN1    | 332 |
| 5664  | PSEN2    | 162 |
| 57105 | CYSLTR2  | 71  |
| 5728  | PTEN     | 911 |
| 57522 | SRGAP1   | 18  |
| 57680 | CHD8     | 66  |
| 5770  | PTPN1    | 22  |
| 5781  | PTPN11   | 571 |
| 5792  | PTPRF    | 38  |
| 58    | ACTA1    | 530 |
| 5818  | NECTIN1  | 375 |
| 5836  | PYGL     | 42  |

|        |         |     |
|--------|---------|-----|
| 5837   | PYGM    | 48  |
| 5879   | RAC1    | 294 |
| 5880   | RAC2    | 50  |
| 5894   | RAF1    | 466 |
| 59     | ACTA2   | 254 |
| 5906   | RAP1A   | 296 |
| 59067  | IL21    | 52  |
| 5908   | RAP1B   | 296 |
| 5914   | RARA    | 178 |
| 5921   | RASA1   | 65  |
| 5922   | RASA2   | 267 |
| 5925   | RB1     | 277 |
| 595    | CCND1   | 257 |
| 596    | BCL2    | 66  |
| 5970   | RELA    | 84  |
| 5993   | RFX5    | 216 |
| 5994   | RFXAP   | 216 |
| 60     | ACTB    | 520 |
| 6091   | ROBO1   | 92  |
| 6092   | ROBO2   | 17  |
| 613    | BCR     | 378 |
| 6197   | RPS6KA3 | 578 |
| 6237   | RRAS    | 267 |
| 64218  | SEMA4A  | 339 |
| 64221  | ROBO3   | 66  |
| 6424   | SFRP4   | 94  |
| 64321  | SOX17   | 25  |
| 64840  | PORCN   | 541 |
| 650    | BMP2    | 482 |
| 652    | BMP4    | 442 |
| 653361 | NCF1    | 190 |
| 657    | BMPR1A  | 435 |
| 658    | BMPR1B  | 387 |
| 659    | BMPR2   | 71  |
| 6647   | SOD1    | 123 |
| 6654   | SOS1    | 337 |
| 6655   | SOS2    | 299 |
| 6696   | SPP1    | 186 |
| 6714   | SRC     | 86  |
| 673    | BRAF    | 912 |
| 6772   | STAT1   | 249 |
| 6773   | STAT2   | 9   |
| 6774   | STAT3   | 479 |
| 6775   | STAT4   | 418 |
| 6777   | STAT5B  | 187 |
| 6778   | STAT6   | 128 |
| 6789   | STK4    | 48  |

|       |          |     |
|-------|----------|-----|
| 6868  | ADAM17   | 75  |
| 6870  | TACR3    | 276 |
| 6885  | MAP3K7   | 532 |
| 6915  | TBXA2R   | 30  |
| 6934  | TCF7L2   | 22  |
| 695   | BTK      | 253 |
| 70    | ACTC1    | 80  |
| 7039  | TGFA     | 30  |
| 7040  | TGFB1    | 429 |
| 7042  | TGFB2    | 264 |
| 7043  | TGFB3    | 346 |
| 7046  | TGFBR1   | 375 |
| 7048  | TGFBR2   | 587 |
| 7056  | THBD     | 59  |
| 7097  | TLR2     | 6   |
| 7098  | TLR3     | 47  |
| 7099  | TLR4     | 287 |
| 71    | ACTG1    | 324 |
| 7124  | TNF      | 36  |
| 7132  | TNFRSF1A | 217 |
| 7133  | TNFRSF1B | 139 |
| 7148  | TNXB     | 163 |
| 7157  | TP53     | 510 |
| 7173  | TPO      | 91  |
| 7189  | TRAF6    | 66  |
| 72    | ACTG2    | 242 |
| 7201  | TRHR     | 76  |
| 7248  | TSC1     | 401 |
| 7249  | TSC2     | 385 |
| 7252  | TSHB     | 104 |
| 7253  | TSHR     | 179 |
| 7297  | TYK2     | 33  |
| 7299  | TYR      | 140 |
| 7305  | TYROBP   | 190 |
| 7424  | VEGFC    | 94  |
| 7450  | VWF      | 96  |
| 7454  | WAS      | 317 |
| 7471  | WNT1     | 78  |
| 7473  | WNT3     | 236 |
| 7474  | WNT5A    | 467 |
| 7476  | WNT7A    | 402 |
| 7480  | WNT10B   | 117 |
| 7482  | WNT2B    | 7   |
| 7535  | ZAP70    | 194 |
| 7852  | CXCR4    | 193 |
| 801   | CALM1    | 64  |
| 80326 | WNT10A   | 207 |

|       |           |     |
|-------|-----------|-----|
| 805   | CALM2     | 81  |
| 8074  | FGF23     | 82  |
| 808   | CALM3     | 19  |
| 815   | CAMK2A    | 66  |
| 816   | CAMK2B    | 66  |
| 81607 | NECTIN4   | 104 |
| 81624 | DIAPH3    | 26  |
| 8200  | GDF5      | 602 |
| 8302  | KLRC4     | 287 |
| 8322  | FZD4      | 84  |
| 8323  | FZD6      | 10  |
| 83700 | JAM3      | 86  |
| 8398  | PLA2G6    | 304 |
| 841   | CASP8     | 100 |
| 843   | CASP10    | 331 |
| 84433 | CARD11    | 77  |
| 8516  | ITGA8     | 149 |
| 8517  | IKBKG     | 437 |
| 85366 | MYLK2     | 28  |
| 857   | CAV1      | 497 |
| 859   | CAV3      | 180 |
| 8600  | TNFSF11   | 267 |
| 861   | RUNX1     | 104 |
| 8625  | RFXANK    | 216 |
| 8660  | IRS2      | 22  |
| 867   | CBL       | 183 |
| 8737  | RIPK1     | 59  |
| 8772  | FADD      | 56  |
| 8792  | TNFRSF11A | 288 |
| 8795  | TNFRSF10B | 9   |
| 8822  | FGF17     | 286 |
| 8823  | FGF16     | 28  |
| 8863  | PER3      | 12  |
| 8864  | PER2      | 13  |
| 8915  | BCL10     | 163 |
| 894   | CCND2     | 115 |
| 8945  | BTRC      | 45  |
| 89780 | WNT3A     | 29  |
| 90    | ACVR1     | 199 |
| 90993 | CREB3L1   | 67  |
| 9180  | OSMR      | 38  |
| 9181  | ARHGEF2   | 119 |
| 919   | CD247     | 107 |
| 9241  | NOG       | 372 |
| 925   | CD8A      | 38  |
| 93    | ACVR2B    | 32  |
| 930   | CD19      | 194 |

|      |         |     |
|------|---------|-----|
| 94   | ACVRL1  | 258 |
| 940  | CD28    | 139 |
| 9423 | NTN1    | 74  |
| 9451 | EIF2AK3 | 393 |
| 9459 | ARHGEF6 | 210 |
| 948  | CD36    | 18  |
| 958  | CD40    | 53  |
| 959  | CD40LG  | 106 |
| 9630 | GNA14   | 80  |
| 9672 | SDC3    | 20  |
| 9863 | MAGI2   | 37  |
| 990  | CDC6    | 292 |
| 998  | CDC42   | 308 |

**Table S3.** KEGG functional importance genes

| Entrez Gene ID | Gene name | Drug-target (1: True, 0: False) | Drug ID (-: unknown) | Tumor suppressor (1: True, 0: False) | Oncogene (1: True, 0: False) |
|----------------|-----------|---------------------------------|----------------------|--------------------------------------|------------------------------|
| 387            | RHOA      | 1                               | DB04315              | 1                                    | 1                            |
| 2885           | GRB2      | 1                               | DB00061              | 0                                    | 0                            |
| 2549           | GAB1      | 0                               | -                    | 0                                    | 1                            |
| 25             | ABL1      | 1                               | DB00171              | 0                                    | 1                            |
| 6093           | ROCK1     | 1                               | DB04707              | 0                                    | 1                            |
| 9475           | ROCK2     | 1                               | DB08162              | 0                                    | 0                            |
| 1398           | CRK       | 0                               | -                    | 0                                    | 1                            |
| 1399           | CRKL      | 0                               | -                    | 0                                    | 1                            |
| 5879           | RAC1      | 1                               | DB00993              | 0                                    | 1                            |
| 5880           | RAC2      | 1                               | DB00514              | 0                                    | 0                            |
| 5881           | RAC3      | 0                               | -                    | 0                                    | 1                            |
| 6714           | SRC       | 1                               | DB01254              | 0                                    | 1                            |
| 3667           | IRS1      | 1                               | DB08513              | 0                                    | 0                            |
| 8471           | IRS4      | 0                               | -                    | 0                                    | 0                            |
| 8660           | IRS2      | 0                               | -                    | 0                                    | 1                            |
| 7294           | TXK       | 1                               | DB12010              | 0                                    | 0                            |
| 5499           | PPP1CA    | 1                               | DB02506              | 1                                    | 0                            |
| 5500           | PPP1CB    | 0                               | -                    | 0                                    | 0                            |
| 5501           | PPP1CC    | 1                               | DB02169              | 0                                    | 0                            |
| 2911           | GRM1      | 1                               | DB00142              | 0                                    | 1                            |
| 2915           | GRM5      | 1                               | DB00659              | 0                                    | 0                            |
| 2932           | GSK3B     | 1                               | DB01356              | 1                                    | 0                            |
| 5058           | PAK1      | 1                               | DB12010              | 0                                    | 1                            |
| 2776           | GNAQ      | 0                               | -                    | 0                                    | 1                            |
| 1956           | EGFR      | 1                               | DB00002              | 0                                    | 1                            |
| 9020           | MAP3K14   | 0                               | -                    | 0                                    | 0                            |
| 836            | CASP3     | 1                               | DB01017              | 0                                    | 0                            |
| 2889           | RAPGEF1   | 0                               | -                    | 0                                    | 0                            |
| 2775           | GNAO1     | 0                               | -                    | 0                                    | 0                            |
| 867            | CBL       | 0                               | -                    | 1                                    | 1                            |
| 868            | CBLB      | 0                               | -                    | 0                                    | 1                            |
| 23624          | CBLC      | 0                               | -                    | 0                                    | 0                            |
| 2149           | F2R       | 1                               | DB00086              | 0                                    | 0                            |
| 998            | CDC42     | 1                               | DB02623              | 0                                    | 0                            |
| 5601           | MAPK9     | 1                               | DB07020              | 1                                    | 0                            |
| 5599           | MAPK8     | 1                               | DB01782              | 0                                    | 0                            |
| 5602           | MAPK10    | 1                               | DB01782              | 1                                    | 0                            |
| 4659           | PPP1R12A  | 0                               | -                    | 0                                    | 0                            |
| 5335           | PLCG1     | 0                               | -                    | 0                                    | 0                            |

**Table S4.** KEGG functional importance genes (continuous). *NuCancer* represents the number of KEGG genes associated with any cancer types.

| <i>Entrez Gene ID</i> | <i>Gene name</i> | <i>Essential gene<br/>(1:True, 0:False)</i> | <i>NuCancer</i> | <i>Disease gene<br/>(1:True, 0:False)</i> |
|-----------------------|------------------|---------------------------------------------|-----------------|-------------------------------------------|
| 387                   | RHOA             | 1                                           | 16              | 1                                         |
| 2885                  | GRB2             | 1                                           | 0               | 1                                         |
| 2549                  | GAB1             | 1                                           | 18              | 1                                         |
| 25                    | ABL1             | 1                                           | 19              | 1                                         |
| 6093                  | ROCK1            | 1                                           | 0               | 1                                         |
| 9475                  | ROCK2            | 1                                           | 0               | 1                                         |
| 1398                  | CRK              | 1                                           | 0               | 1                                         |
| 1399                  | CRKL             | 1                                           | 11              | 1                                         |
| 5879                  | RAC1             | 1                                           | 12              | 1                                         |
| 5880                  | RAC2             | 0                                           | 16              | 1                                         |
| 5881                  | RAC3             | 1                                           | 0               | 1                                         |
| 6714                  | SRC              | 1                                           | 15              | 1                                         |
| 3667                  | IRS1             | 1                                           | 21              | 1                                         |
| 8471                  | IRS4             | 1                                           | 21              | 1                                         |
| 8660                  | IRS2             | 1                                           | 17              | 1                                         |
| 7294                  | TXK              | 0                                           | 0               | 1                                         |
| 5499                  | PPP1CA           | 1                                           | 0               | 1                                         |
| 5500                  | PPP1CB           | 1                                           | 11              | 1                                         |
| 5501                  | PPP1CC           | 1                                           | 0               | 1                                         |
| 2911                  | GRM1             | 1                                           | 0               | 1                                         |
| 2915                  | GRM5             | 1                                           | 0               | 1                                         |
| 2932                  | GSK3B            | 1                                           | 17              | 1                                         |
| 5058                  | PAK1             | 0                                           | 17              | 1                                         |
| 2776                  | GNAQ             | 1                                           | 15              | 1                                         |
| 1956                  | EGFR             | 1                                           | 21              | 1                                         |
| 9020                  | MAP3K14          | 0                                           | 6               | 1                                         |
| 836                   | CASP3            | 1                                           | 0               | 1                                         |
| 2889                  | RAPGEF1          | 1                                           | 0               | 1                                         |
| 2775                  | GNAO1            | 1                                           | 0               | 1                                         |
| 867                   | CBL              | 1                                           | 19              | 1                                         |
| 868                   | CBLB             | 1                                           | 20              | 1                                         |
| 23624                 | CBLC             | 0                                           | 20              | 1                                         |
| 2149                  | F2R              | 1                                           | 0               | 1                                         |
| 998                   | CDC42            | 1                                           | 16              | 1                                         |
| 5601                  | MAPK9            | 1                                           | 0               | 1                                         |
| 5599                  | MAPK8            | 1                                           | 0               | 1                                         |
| 5602                  | MAPK10           | 0                                           | 0               | 1                                         |
| 4659                  | PPP1R12A         | 1                                           | 0               | 1                                         |
| 5335                  | PLCG1            | 1                                           | 23              | 1                                         |
| 2534                  | FYN              | 1                                           | 18              | 1                                         |
| 4067                  | LYN              | 1                                           | 18              | 1                                         |
| 815                   | CAMK2A           | 1                                           | 0               | 1                                         |
| 816                   | CAMK2B           | 0                                           | 0               | 1                                         |
| 817                   | CAMK2D           | 0                                           | 0               | 1                                         |
| 818                   | CAMK2G           | 1                                           | 0               | 1                                         |
| 5900                  | RALGDS           | 0                                           | 18              | 1                                         |
| 5502                  | PPP1R1A          | 0                                           | 0               | 1                                         |
| 5781                  | PTPN11           | 1                                           | 17              | 1                                         |
| 1630                  | DCC              | 1                                           | 0               | 1                                         |
| 5336                  | PLCG2            | 1                                           | 20              | 1                                         |
| 23365                 | ARHGEF12         | 1                                           | 20              | 1                                         |

|       |         |   |    |   |
|-------|---------|---|----|---|
| 7409  | VAV1    | 1 | 20 | 1 |
| 7410  | VAV2    | 0 | 21 | 1 |
| 10451 | VAV3    | 0 | 0  | 1 |
| 2768  | GNA12   | 1 | 15 | 1 |
| 5747  | PTK2    | 1 | 0  | 1 |
| 1855  | DVL1    | 1 | 0  | 1 |
| 1856  | DVL2    | 1 | 0  | 1 |
| 1857  | DVL3    | 1 | 0  | 1 |
| 3265  | HRAS    | 0 | 13 | 1 |
| 3845  | KRAS    | 1 | 25 | 1 |
| 4893  | NRAS    | 1 | 22 | 1 |
| 7048  | TGFB2   | 1 | 21 | 1 |
| 5290  | PIK3CA  | 1 | 23 | 1 |
| 5291  | PIK3CB  | 1 | 22 | 1 |
| 5293  | PIK3CD  | 1 | 21 | 1 |
| 5294  | PIK3CG  | 0 | 20 | 1 |
| 5906  | RAP1A   | 1 | 0  | 1 |
| 5908  | RAP1B   | 1 | 0  | 1 |
| 1499  | CTNNB1  | 1 | 22 | 1 |
| 5295  | PIK3R1  | 1 | 21 | 1 |
| 5296  | PIK3R2  | 1 | 20 | 1 |
| 8503  | PIK3R3  | 0 | 19 | 1 |
| 23533 | PIK3R5  | 0 | 0  | 1 |
| 2147  | F2      | 1 | 0  | 1 |
| 3688  | ITGB1   | 1 | 0  | 1 |
| 9138  | ARHGEF1 | 1 | 0  | 1 |
| 8772  | FADD    | 1 | 0  | 1 |
| 10672 | GNA13   | 1 | 15 | 1 |
| 27040 | LAT     | 1 | 0  | 1 |
| 2475  | MTOR    | 1 | 23 | 1 |
| 1445  | CSK     | 1 | 0  | 1 |
| 1147  | CHUK    | 1 | 0  | 1 |
| 3551  | IKBKB   | 1 | 18 | 1 |
| 8517  | IKBKG   | 1 | 0  | 1 |
| 3937  | LCP2    | 1 | 0  | 1 |
| 5590  | PRKCZ   | 1 | 0  | 1 |
| 5777  | PTPN6   | 1 | 16 | 1 |
| 5579  | PRKCB   | 1 | 0  | 1 |
| 3480  | IGF1R   | 1 | 21 | 1 |
| 5340  | PLG     | 1 | 0  | 1 |
| 8826  | IQGAP1  | 1 | 0  | 1 |
| 5605  | MAP2K2  | 0 | 16 | 1 |
| 6654  | SOS1    | 1 | 22 | 1 |
| 6655  | SOS2    | 1 | 0  | 1 |
| 9846  | GAB2    | 1 | 16 | 1 |
| 2890  | GRIA1   | 1 | 0  | 1 |
| 2891  | GRIA2   | 1 | 0  | 1 |
| 5578  | PRKCA   | 1 | 0  | 1 |
| 5582  | PRKCG   | 1 | □  | 1 |
| 6009  | RHEB    | 1 | 12 | 1 |
| 5922  | RASA2   | 0 | 0  | 1 |
| 7535  | ZAP70   | 0 | 0  | 1 |
| 2770  | GNAI1   | 1 | 0  | 1 |
| 2771  | GNAI2   | 1 | 0  | 1 |
| 2773  | GNAI3   | 0 | 0  | 1 |

|        |         |   |    |   |
|--------|---------|---|----|---|
| 9459   | ARHGEF6 | 1 | 0  | 1 |
| 841    | CASP8   | 1 | 19 | 1 |
| 6850   | SYK     | 1 | 20 | 1 |
| 843    | CASP10  | 0 | 0  | 1 |
| 5594   | MAPK1   | 1 | 18 | 1 |
| 5595   | MAPK3   | 1 | 13 | 1 |
| 25791  | NGEF    | 1 | 0  | 1 |
| 2774   | GNAL    | 1 | 0  | 1 |
| 55970  | GNG12   | 1 | 0  | 0 |
| 7249   | TSC2    | 1 | 22 | 1 |
| 3683   | ITGAL   | 0 | 0  | 1 |
| 3689   | ITGB2   | 1 | 0  | 1 |
| 1500   | CTNND1  | 1 | 0  | 1 |
| 801    | CALM1   | 0 | 0  | 1 |
| 805    | CALM2   | 1 | 0  | 1 |
| 808    | CALM3   | 0 | 0  | 1 |
| 810    | CALML3  | 0 | 0  | 1 |
| 51806  | CALML5  | 0 | 0  | 1 |
| 163688 | CALML6  | 1 | 0  | 0 |
| 8936   | WASF1   | 1 | 0  | 1 |
| 10163  | WASF2   | 1 | 0  | 1 |
| 2159   | F10     | 1 | 0  | 1 |
| 2207   | FCER1G  | 1 | 0  | 1 |
| 2066   | ERBB4   | 1 | 25 | 1 |
| 51744  | CD244   | 0 | 0  | 1 |
| 3690   | ITGB3   | 1 | 0  | 1 |
| 3691   | ITGB4   | 1 | 0  | 1 |
| 3693   | ITGB5   | 1 | 0  | 1 |
| 3694   | ITGB6   | 0 | 0  | 1 |
| 3695   | ITGB7   | 0 | 0  | 1 |
| 3696   | ITGB8   | 1 | 0  | 1 |
| 5159   | PDGFRB  | 1 | 22 | 1 |
| 2778   | GNAS    | 1 | 22 | 1 |
| 7186   | TRAF2   | 1 | 18 | 1 |
| 8737   | RIPK1   | 1 | 0  | 1 |
| 1387   | CREBBP  | 1 | 24 | 1 |
| 2033   | EP300   | 1 | 27 | 1 |
| 7040   | TGFB1   | 1 | 0  | 1 |
| 7042   | TGFB2   | 1 | 0  | 1 |
| 7043   | TGFB3   | 1 | 0  | 1 |
| 5156   | PDGFRA  | 1 | 21 | 1 |
| 8440   | NCK2    | 1 | 0  | 1 |
| 5921   | RASA1   | 1 | 22 | 1 |
| 5062   | PAK2    | 1 | 0  | 1 |
| 4690   | NCK1    | 1 | 0  | 1 |
| 6464   | SHC1    | 1 | 0  | 1 |
| 25759  | SHC2    | 0 | 0  | 1 |
| 53358  | SHC3    | 1 | 0  | 1 |
| 399694 | SHC4    | 1 | 0  | 1 |
| 5515   | PPP2CA  | 1 | 0  | 1 |
| 5516   | PPP2CB  | 0 | 0  | 1 |
| 5518   | PPP2R1A | 1 | 18 | 1 |
| 5519   | PPP2R1B | 0 | 0  | 1 |
| 842    | CASP9   | 1 | 0  | 1 |
| 6237   | RRAS    | 0 | 10 | 1 |

|        |          |   |    |   |
|--------|----------|---|----|---|
| 22800  | RRAS2    | 1 | 12 | 1 |
| 22808  | MRAS     | 0 | 0  | 1 |
| 4615   | MYD88    | 0 | 13 | 1 |
| 7157   | TP53     | 1 | 26 | 1 |
| 1839   | HBEGF    | 1 | 0  | 1 |
| 1729   | DIAPH1   | 1 | 0  | 1 |
| 1730   | DIAPH2   | 1 | 0  | 1 |
| 23396  | PIP5K1C  | 1 | 0  | 1 |
| 3676   | ITGA4    | 1 | 0  | 1 |
| 5170   | PDPK1    | 1 | 15 | 1 |
| 4638   | MYLK     | 0 | 0  | 1 |
| 85366  | MYLK2    | 1 | 0  | 1 |
| 91807  | MYLK3    | 0 | 0  | 1 |
| 5063   | PAK3     | 1 | 19 | 1 |
| 10298  | PAK4     | 1 | 0  | 1 |
| 56924  | PAK6     | 1 | 0  | 1 |
| 57144  | PAK5     | 0 | 21 | 1 |
| 27289  | RND1     | 1 | 0  | 1 |
| 148022 | TICAM1   | 0 | 0  | 1 |
| 3791   | KDR      | 1 | 23 | 1 |
| 369    | ARAF     | 1 | 19 | 1 |
| 4851   | NOTCH1   | 1 | 23 | 1 |
| 4853   | NOTCH2   | 1 | 20 | 1 |
| 4854   | NOTCH3   | 0 | 23 | 1 |
| 4855   | NOTCH4   | 0 | 23 | 1 |
| 5728   | PTEN     | 1 | 21 | 1 |
| 10842  | PPP1R17  | 0 | 0  | 1 |
| 4233   | MET      | 1 | 20 | 1 |
| 5604   | MAP2K1   | 1 | 16 | 1 |
| 1793   | DOCK1    | 1 | 0  | 1 |
| 10928  | RALBP1   | 0 | 0  | 1 |
| 5530   | PPP3CA   | 1 | 0  | 1 |
| 5532   | PPP3CB   | 1 | 0  | 1 |
| 5533   | PPP3CC   | 0 | 0  | 1 |
| 5534   | PPP3R1   | 1 | 0  | 1 |
| 5535   | PPP3R2   | 0 | 0  | 0 |
| 11261  | CHP1     | 1 | 0  | 1 |
| 63928  | CHP2     | 0 | 0  | 1 |
| 6091   | ROBO1    | 1 | 22 | 1 |
| 940    | CD28     | 0 | 13 | 1 |
| 50649  | ARHGEF4  | 1 | 0  | 1 |
| 5364   | PLXNB1   | 0 | 0  | 1 |
| 5365   | PLXNB3   | 0 | 0  | 1 |
| 23654  | PLXNB2   | 1 | 0  | 1 |
| 9855   | FARP2    | 0 | 0  | 1 |
| 7132   | TNFRSF1A | 1 | 0  | 1 |
| 7305   | TYROBP   | 0 | 0  | 1 |
| 10746  | MAP3K2   | 1 | 0  | 1 |
| 10458  | BAIAP2   | 1 | 0  | 1 |
| 3684   | ITGAM    | 0 | 0  | 1 |
| 9901   | SRGAP3   | 1 | 0  | 1 |
| 23380  | SRGAP2   | 0 | 0  | 1 |
| 57522  | SRGAP1   | 1 | 0  | 1 |
| 3643   | INSR     | 1 | 20 | 1 |
| 5898   | RALA     | 1 | 0  | 1 |

|       |         |   |    |   |
|-------|---------|---|----|---|
| 5899  | RALB    | 0 | 0  | 1 |
| 3984  | LIMK1   | 1 | 0  | 1 |
| 3985  | LIMK2   | 1 | 0  | 1 |
| 572   | BAD     | 1 | 0  | 1 |
| 8717  | TRADD   | 0 | 0  | 1 |
| 3383  | ICAM1   | 0 | 0  | 1 |
| 5609  | MAP2K7  | 1 | 0  | 1 |
| 5894  | RAF1    | 1 | 19 | 1 |
| 4193  | MDM2    | 1 | 19 | 1 |
| 5624  | PROC    | 1 | 0  | 1 |
| 5361  | PLXNA1  | 1 | 0  | 1 |
| 5362  | PLXNA2  | 1 | 0  | 1 |
| 55558 | PLXNA3  | 1 | 0  | 1 |
| 2260  | FGFR1   | 1 | 19 | 1 |
| 4089  | SMAD4   | 1 | 17 | 1 |
| 595   | CCND1   | 1 | 14 | 1 |
| 894   | CCND2   | 1 | 13 | 1 |
| 896   | CCND3   | 1 | 14 | 1 |
| 2158  | F9      | 1 | 0  | 1 |
| 3554  | IL1R1   | 0 | 0  | 1 |
| 3680  | ITGA9   | 1 | 0  | 1 |
| 355   | FAS     | 1 | 15 | 1 |
| 3479  | IGF1    | 1 | 15 | 1 |
| 2161  | F12     | 0 | 0  | 1 |
| 3655  | ITGA6   | 1 | 0  | 1 |
| 3672  | ITGA1   | 1 | 0  | 1 |
| 3673  | ITGA2   | 1 | 0  | 1 |
| 3674  | ITGA2B  | 1 | 0  | 1 |
| 3675  | ITGA3   | 1 | 0  | 1 |
| 3678  | ITGA5   | 1 | 0  | 1 |
| 3679  | ITGA7   | 1 | 0  | 1 |
| 3685  | ITGAV   | 1 | 0  | 1 |
| 8515  | ITGA10  | 0 | 0  | 1 |
| 8516  | ITGA8   | 1 | 0  | 1 |
| 22801 | ITGA11  | 0 | 0  | 1 |
| 2322  | FLT3    | 0 | 20 | 1 |
| 6092  | ROBO2   | 1 | 0  | 1 |
| 29851 | ICOS    | 0 | 0  | 1 |
| 3815  | KIT     | 1 | 23 | 1 |
| 7852  | CXCR4   | 1 | 17 | 1 |
| 1910  | EDNRB   | 1 | 0  | 1 |
| 1394  | CRHR1   | 1 | 0  | 1 |
| 2065  | ERBB3   | 1 | 21 | 1 |
| 2263  | FGFR2   | 1 | 21 | 1 |
| 2064  | ERBB2   | 1 | 22 | 1 |
| 7850  | IL1R2   | 0 | 0  | 1 |
| 4301  | AFDN    | 1 | 24 | 1 |
| 3932  | LCK     | 1 | 17 | 1 |
| 3802  | KIR2DL1 | 0 | 0  | 1 |
| 3803  | KIR2DL2 | 0 | 0  | 1 |
| 3804  | KIR2DL3 | 1 | 0  | 1 |
| 3805  | KIR2DL4 | 0 | 0  | 1 |
| 3811  | KIR3DL1 | 0 | 0  | 1 |
| 3812  | KIR3DL2 | 0 | 0  | 1 |
| 3821  | KLRC1   | 0 | 0  | 1 |

|        |          |   |    |   |
|--------|----------|---|----|---|
| 3824   | KLRD1    | 0 | 0  | 1 |
| 57292  | KIR2DL5A | 0 | 0  | 1 |
| 2767   | GNA11    | 1 | 17 | 1 |
| 2769   | GNA15    | 0 | 0  | 1 |
| 9630   | GNA14    | 0 | 0  | 1 |
| 2781   | GNAZ     | 1 | 0  | 1 |
| 1020   | CDK5     | 1 | 0  | 1 |
| 919    | CD247    | 1 | 0  | 1 |
| 4214   | MAP3K1   | 1 | 20 | 1 |
| 4052   | LTBP1    | 1 | 0  | 1 |
| 4087   | SMAD2    | 1 | 15 | 1 |
| 4088   | SMAD3    | 1 | 18 | 1 |
| 5328   | PLAU     | 1 | 0  | 1 |
| 7454   | WAS      | 1 | 13 | 1 |
| 8976   | WASL     | 1 | 0  | 1 |
| 5327   | PLAT     | 1 | 0  | 1 |
| 1978   | EIF4EBP1 | 0 | 0  | 1 |
| 394    | ARHGAP5  | 1 | 0  | 1 |
| 2909   | ARHGAP35 | 1 | 23 | 1 |
| 9564   | BCAR1    | 1 | 0  | 1 |
| 353376 | TICAM2   | 0 | 0  | 1 |
| 2535   | FZD2     | 1 | 0  | 1 |
| 7855   | FZD5     | 1 | 0  | 1 |
| 7976   | FZD3     | 1 | 0  | 1 |
| 8321   | FZD1     | 0 | 0  | 1 |
| 8322   | FZD4     | 1 | 0  | 1 |
| 8323   | FZD6     | 1 | 0  | 1 |
| 8324   | FZD7     | 0 | 0  | 1 |
| 8325   | FZD8     | 0 | 0  | 1 |
| 8326   | FZD9     | 1 | 0  | 1 |
| 11211  | FZD10    | 0 | 0  | 1 |
| 814    | CAMK4    | 1 | 0  | 1 |
| 5566   | PRKACA   | 1 | 17 | 1 |
| 5567   | PRKACB   | 1 | 0  | 1 |
| 5568   | PRKACG   | 0 | 0  | 1 |
| 5613   | PRKX     | 0 | 0  | 1 |
| 5616   | PRKY     | 0 | 0  | 1 |
| 1969   | EPHA2    | 0 | 0  | 1 |
| 2041   | EPHA1    | 0 | 0  | 1 |
| 2042   | EPHA3    | 1 | 22 | 1 |
| 2043   | EPHA4    | 1 | 0  | 1 |
| 2044   | EPHA5    | 0 | 22 | 1 |
| 2045   | EPHA7    | 1 | 22 | 1 |
| 2046   | EPHA8    | 0 | 0  | 1 |
| 285220 | EPHA6    | 1 | 0  | 1 |
| 2798   | GNRHR    | 0 | 0  | 1 |
| 56288  | PARD3    | 1 | 0  | 1 |
| 5255   | PHKA1    | 0 | 0  | 1 |
| 5256   | PHKA2    | 1 | 0  | 1 |
| 5257   | PHKB     | 0 | 0  | 1 |
| 5260   | PHKG1    | 0 | 0  | 1 |
| 5261   | PHKG2    | 0 | 0  | 1 |
| 2245   | FGD1     | 1 | 0  | 1 |
| 89846  | FGD3     | 0 | 0  | 1 |
| 4068   | SH2D1A   | 0 | 13 | 1 |

|        |           |   |    |   |
|--------|-----------|---|----|---|
| 28964  | GIT1      | 1 | 0  | 1 |
| 83593  | RASSF5    | 0 | 0  | 1 |
| 10810  | WASF3     | 1 | 0  | 1 |
| 3973   | LHCGR     | 1 | 0  | 1 |
| 3624   | INHBA     | 1 | 21 | 1 |
| 3625   | INHBB     | 1 | 0  | 1 |
| 3626   | INHBC     | 0 | 0  | 1 |
| 83729  | INHBE     | 0 | 0  | 1 |
| 3071   | NCKAP1L   | 1 | 0  | 1 |
| 10152  | ABI2      | 1 | 0  | 1 |
| 10787  | NCKAP1    | 1 | 0  | 1 |
| 23191  | CYFIP1    | 1 | 0  | 1 |
| 26999  | CYFIP2    | 1 | 0  | 1 |
| 8793   | TNFRSF10D | 0 | 0  | 1 |
| 8794   | TNFRSF10C | 0 | 0  | 1 |
| 8795   | TNFRSF10B | 0 | 0  | 1 |
| 8797   | TNFRSF10A | 0 | 0  | 1 |
| 207    | AKT1      | 1 | 16 | 1 |
| 208    | AKT2      | 1 | 19 | 1 |
| 10000  | AKT3      | 1 | 18 | 1 |
| 2185   | PTK2B     | 1 | 0  | 1 |
| 7133   | TNFRSF1B  | 1 | 0  | 1 |
| 3556   | IL1RAP    | 0 | 0  | 1 |
| 7056   | THBD      | 1 | 0  | 1 |
| 2321   | FLT1      | 1 | 21 | 1 |
| 2324   | FLT4      | 1 | 22 | 1 |
| 695    | BTK       | 1 | 18 | 1 |
| 1027   | CDKN1B    | 1 | 14 | 1 |
| 1385   | CREB1     | 1 | 13 | 1 |
| 3645   | INSRR     | 1 | 0  | 1 |
| 468    | ATF4      | 1 | 0  | 1 |
| 9586   | CREB5     | 1 | 0  | 1 |
| 10488  | CREB3     | 1 | 0  | 1 |
| 64764  | CREB3L2   | 1 | 18 | 1 |
| 84699  | CREB3L3   | 0 | 0  | 1 |
| 90993  | CREB3L1   | 1 | 17 | 1 |
| 148327 | CREB3L4   | 1 | 0  | 1 |
| 5054   | SERPINE1  | 0 | 0  | 1 |
| 81624  | DIAPH3    | 1 | 0  | 1 |
| 4157   | MC1R      | 0 | 0  | 1 |
| 1947   | EFNB1     | 1 | 0  | 1 |
| 1948   | EFNB2     | 1 | 0  | 1 |
| 1949   | EFNB3     | 0 | 0  | 1 |
| 1026   | CDKN1A    | 1 | 17 | 1 |
| 4633   | MYL2      | 1 | 0  | 1 |
| 4636   | MYL5      | 1 | 0  | 0 |
| 10398  | MYL9      | 0 | 0  | 1 |
| 10627  | MYL12A    | 1 | 0  | 1 |
| 29895  | MYLPF     | 1 | 0  | 1 |
| 58498  | MYL7      | 1 | 0  | 1 |
| 93408  | MYL10     | 0 | 0  | 0 |
| 103910 | MYL12B    | 0 | 0  | 1 |
| 7189   | TRAF6     | 1 | 0  | 1 |
| 7099   | TLR4      | 0 | 0  | 1 |
| 5350   | PLN       | 1 | 0  | 1 |

|        |        |   |    |   |
|--------|--------|---|----|---|
| 1616   | DAXX   | 1 | 20 | 1 |
| 346562 | GNAT3  | 0 | 0  | 1 |
| 2261   | FGFR3  | 1 | 20 | 1 |
| 5111   | PCNA   | 1 | 0  | 1 |
| 5584   | PRKCI  | 1 | 17 | 1 |
| 1017   | CDK2   | 1 | 0  | 1 |
| 55845  | BRK1   | 1 | 0  | 1 |
| 2264   | FGFR4  | 1 | 20 | 1 |
| 1028   | CDKN1C | 1 | 0  | 1 |
| 91     | ACVR1B | 1 | 18 | 1 |
| 983    | CDK1   | 1 | 0  | 1 |
| 7187   | TRAF3  | 1 | 17 | 1 |
| 890    | CCNA2  | 1 | 0  | 1 |
| 8900   | CCNA1  | 1 | 0  | 1 |
| 7471   | WNT1   | 1 | 0  | 1 |
| 7472   | WNT2   | 1 | 0  | 1 |
| 7473   | WNT3   | 1 | 0  | 1 |
| 7474   | WNT5A  | 1 | 0  | 1 |
| 7475   | WNT6   | 1 | 0  | 1 |
| 7476   | WNT7A  | 1 | 0  | 1 |
| 7477   | WNT7B  | 1 | 0  | 1 |
| 7478   | WNT8A  | 0 | 0  | 1 |
| 7479   | WNT8B  | 0 | 0  | 1 |
| 7480   | WNT10B | 0 | 0  | 1 |
| 7481   | WNT11  | 1 | 0  | 1 |
| 7482   | WNT2B  | 0 | 0  | 1 |
| 7483   | WNT9A  | 1 | 0  | 1 |
| 7484   | WNT9B  | 1 | 0  | 1 |
| 51384  | WNT16  | 0 | 0  | 1 |
| 54361  | WNT4   | 1 | 0  | 1 |
| 80326  | WNT10A | 0 | 0  | 1 |
| 81029  | WNT5B  | 0 | 0  | 1 |
| 89780  | WNT3A  | 1 | 0  | 1 |
| 840    | CASP7  | 1 | 0  | 1 |
| 3654   | IRAK1  | 1 | 0  | 1 |
| 1019   | CDK4   | 1 | 13 | 1 |
| 1021   | CDK6   | 1 | 11 | 1 |
| 4216   | MAP3K4 | 1 | 0  | 1 |
| 1030   | CDKN2B | 0 | 10 | 1 |
| 7046   | TGFBR1 | 1 | 17 | 1 |
| 130399 | ACVR1C | 0 | 0  | 1 |
| 2241   | FER    | 1 | 0  | 1 |
| 1487   | CTBP1  | 1 | 0  | 1 |
| 1488   | CTBP2  | 1 | 0  | 1 |
| 650    | BMP2   | 1 | 0  | 1 |
| 4838   | NODAL  | 1 | 0  | 1 |
| 51135  | IRAK4  | 1 | 0  | 1 |
| 8554   | PIAS1  | 1 | 0  | 1 |
| 9063   | PIAS2  | 1 | 0  | 1 |
| 9641   | IKBKE  | 1 | 18 | 1 |
| 10401  | PIAS3  | 1 | 0  | 1 |
| 29110  | TBK1   | 1 | 0  | 1 |
| 51588  | PIAS4  | 1 | 0  | 1 |
| 655    | BMP7   | 1 | 0  | 1 |
| 8200   | GDF5   | 1 | 0  | 1 |

|        |        |   |    |   |
|--------|--------|---|----|---|
| 898    | CCNE1  | 1 | 16 | 1 |
| 9134   | CCNE2  | 1 | 0  | 1 |
| 596    | BCL2   | 1 | 11 | 1 |
| 9088   | PKMYT1 | 1 | 0  | 1 |
| 10092  | ARPC5  | 0 | 0  | 1 |
| 81873  | ARPC5L | 0 | 0  | 0 |
| 268    | AMH    | 1 | 0  | 1 |
| 959    | CD40LG | 1 | 0  | 1 |
| 4086   | SMAD1  | 1 | 0  | 1 |
| 4090   | SMAD5  | 1 | 0  | 1 |
| 4093   | SMAD9  | 0 | 0  | 1 |
| 5627   | PROS1  | 1 | 0  | 1 |
| 114609 | TIRAP  | 0 | 0  | 1 |
| 941    | CD80   | 0 | 0  | 1 |
| 3065   | HDAC1  | 1 | 16 | 1 |
| 3066   | HDAC2  | 1 | 0  | 1 |
| 3818   | KLKB1  | 0 | 0  | 1 |
| 3827   | KNG1   | 0 | 0  | 1 |
| 3384   | ICAM2  | 0 | 0  | 1 |
| 3385   | ICAM3  | 0 | 0  | 1 |
| 652    | BMP4   | 1 | 0  | 1 |
| 653    | BMP5   | 1 | 0  | 1 |
| 654    | BMP6   | 0 | 0  | 1 |
| 656    | BMP8B  | 1 | 0  | 1 |
| 151449 | GDF7   | 0 | 0  | 1 |
| 353500 | BMP8A  | 1 | 0  | 1 |
| 392255 | GDF6   | 1 | 0  | 1 |
| 4991   | OR1D2  | 0 | 0  | 0 |
| 4992   | OR1F1  | 0 | 0  | 0 |
| 4993   | OR2C1  | 0 | 0  | 0 |
| 4994   | OR3A1  | 0 | 0  | 0 |
| 4995   | OR3A2  | 0 | 0  | 1 |
| 7932   | OR2H2  | 0 | 0  | 0 |
| 8383   | OR1A1  | 0 | 0  | 0 |
| 8385   | -      | 1 | 0  | 0 |
| 8386   | OR1D5  | 0 | 0  | 0 |
| 8387   | OR1E1  | 0 | 0  | 0 |
| 8388   | OR1E2  | 0 | 0  | 1 |
| 8390   | OR1G1  | 0 | 0  | 0 |
| 8392   | OR3A3  | 0 | 0  | 0 |
| 8590   | OR6A2  | 0 | 0  | 0 |
| 10798  | OR5I1  | 0 | 0  | 0 |
| 23538  | OR52A1 | 0 | 0  | 0 |
| 26188  | OR1C1  | 0 | 0  | 0 |
| 26189  | OR1A2  | 0 | 0  | 0 |
| 26211  | OR2F1  | 0 | 0  | 0 |
| 26212  | OR2B6  | 0 | 0  | 0 |
| 26219  | OR1J4  | 0 | 0  | 0 |
| 26245  | OR2M4  | 0 | 0  | 0 |
| 26246  | OR2L2  | 0 | 0  | 0 |
| 26248  | OR2K2  | 0 | 0  | 0 |
| 26333  | OR7A17 | 0 | 0  | 0 |
| 26338  | OR5L2  | 0 | 0  | 0 |
| 26339  | OR5K1  | 0 | 0  | 0 |
| 26476  | OR10J1 | 0 | 0  | 1 |

|       |        |   |   |   |
|-------|--------|---|---|---|
| 26492 | OR8G2P | 0 | 0 | 0 |
| 26493 | OR8B8  | 0 | 0 | 0 |
| 26494 | OR8G1  | 0 | 0 | 0 |
| 26496 | OR10A3 | 0 | 0 | 0 |
| 26529 | OR12D2 | 0 | 0 | 0 |
| 26531 | OR11A1 | 0 | 0 | 0 |
| 26532 | OR10H3 | 0 | 0 | 0 |
| 26533 | OR10G3 | 0 | 0 | 0 |
| 26534 | OR10G2 | 0 | 0 | 0 |
| 26538 | OR10H2 | 0 | 0 | 0 |
| 26539 | OR10H1 | 0 | 0 | 0 |
| 26658 | OR7C2  | 0 | 0 | 0 |
| 26659 | OR7A5  | 1 | 0 | 0 |
| 26664 | OR7C1  | 0 | 0 | 0 |
| 26682 | OR4F4  | 0 | 0 | 0 |
| 26683 | OR4F3  | 0 | 0 | 0 |
| 26686 | OR4E2  | 0 | 0 | 0 |
| 26689 | OR4D1  | 0 | 0 | 0 |
| 26692 | OR2W1  | 0 | 0 | 0 |
| 26696 | OR2T1  | 0 | 0 | 0 |
| 26707 | OR2J2  | 0 | 0 | 0 |
| 26716 | OR2H1  | 0 | 0 | 0 |
| 26735 | OR1L3  | 0 | 0 | 0 |
| 26737 | OR1L1  | 0 | 0 | 0 |
| 26740 | OR1J2  | 0 | 0 | 0 |
| 56656 | OR2S2  | 1 | 0 | 0 |
| 79290 | OR13A1 | 0 | 0 | 0 |
| 79295 | OR5H6  | 0 | 0 | 0 |
| 79310 | OR5H2  | 0 | 0 | 0 |
| 79317 | OR4K5  | 0 | 0 | 0 |
| 79324 | OR51G1 | 0 | 0 | 0 |
| 79339 | OR51B4 | 0 | 0 | 0 |
| 79345 | OR51B2 | 0 | 0 | 0 |
| 79473 | OR52N1 | 0 | 0 | 0 |
| 79501 | OR4F5  | 0 | 0 | 0 |
| 79541 | OR2A4  | 0 | 0 | 0 |
| 79544 | OR4K1  | 0 | 0 | 0 |
| 81050 | OR5AC2 | 0 | 0 | 0 |
| 81061 | OR11H1 | 0 | 0 | 0 |
| 81099 | OR4F17 | 0 | 0 | 0 |
| 81127 | OR4K15 | 0 | 0 | 0 |
| 81168 | OR8J3  | 0 | 0 | 0 |
| 81282 | OR51G2 | 0 | 0 | 0 |
| 81285 | OR51E2 | 0 | 0 | 1 |
| 81300 | OR4P4  | 0 | 0 | 0 |
| 81309 | OR4C15 | 0 | 0 | 1 |
| 81318 | OR4A5  | 0 | 0 | 0 |
| 81327 | OR4A16 | 0 | 0 | 0 |
| 81328 | OR4A15 | 0 | 0 | 0 |
| 81392 | OR2AE1 | 0 | 0 | 0 |
| 81399 | OR4F16 | 0 | 0 | 0 |
| 81442 | OR6N2  | 0 | 0 | 0 |
| 81448 | OR6K2  | 0 | 0 | 0 |
| 81469 | OR2G3  | 0 | 0 | 0 |
| 81470 | OR2G2  | 0 | 0 | 0 |

|        |         |   |   |   |
|--------|---------|---|---|---|
| 81472  | OR2C3   | 0 | 0 | 0 |
| 81696  | OR5V1   | 0 | 0 | 1 |
| 81697  | OR2B2   | 0 | 0 | 0 |
| 81797  | OR12D3  | 0 | 0 | 1 |
| 119678 | OR52E2  | 0 | 0 | 0 |
| 119679 | OR52J3  | 0 | 0 | 0 |
| 119682 | OR51L1  | 0 | 0 | 0 |
| 119687 | OR51A7  | 0 | 0 | 0 |
| 119692 | OR51S1  | 0 | 0 | 0 |
| 119694 | OR51F2  | 0 | 0 | 0 |
| 119695 | OR52R1  | 0 | 0 | 0 |
| 119749 | OR4C46  | 0 | 0 | 1 |
| 119764 | OR4X2   | 0 | 0 | 0 |
| 119765 | OR4B1   | 0 | 0 | 0 |
| 119772 | OR52M1  | 0 | 0 | 0 |
| 119774 | OR52K2  | 0 | 0 | 0 |
| 120065 | OR5P2   | 0 | 0 | 0 |
| 120066 | OR5P3   | 0 | 0 | 0 |
| 120586 | OR8I2   | 1 | 0 | 0 |
| 120775 | OR2D3   | 0 | 0 | 0 |
| 120776 | OR2D2   | 0 | 0 | 0 |
| 120787 | OR52W1  | 0 | 0 | 0 |
| 120793 | OR56A4  | 0 | 0 | 0 |
| 120796 | OR56A1  | 0 | 0 | 0 |
| 121130 | OR10P1  | 0 | 0 | 0 |
| 121275 | OR10AD1 | 0 | 0 | 0 |
| 121364 | OR10A7  | 0 | 0 | 0 |
| 122740 | OR4K14  | 0 | 0 | 0 |
| 122742 | OR4L1   | 0 | 0 | 0 |
| 122748 | OR11H6  | 0 | 0 | 0 |
| 124538 | OR4D2   | 1 | 0 | 0 |
| 125958 | OR7D4   | 0 | 0 | 1 |
| 125962 | OR7G1   | 0 | 0 | 0 |
| 125963 | OR1M1   | 0 | 0 | 0 |
| 126370 | OR1I1   | 0 | 0 | 0 |
| 126541 | OR10H4  | 0 | 0 | 0 |
| 127059 | OR2M5   | 0 | 0 | 0 |
| 127062 | OR2M3   | 0 | 0 | 0 |
| 127064 | OR2T12  | 0 | 0 | 1 |
| 127066 | OR14C36 | 0 | 0 | 0 |
| 127068 | OR2T34  | 0 | 0 | 0 |
| 127069 | OR2T10  | 0 | 0 | 0 |
| 127074 | OR2T4   | 0 | 0 | 0 |
| 127077 | OR2T11  | 0 | 0 | 0 |
| 127385 | OR10J5  | 0 | 0 | 0 |
| 127623 | OR2B11  | 0 | 0 | 0 |
| 128360 | OR10T2  | 0 | 0 | 1 |
| 128367 | OR10X1  | 0 | 0 | 0 |
| 128368 | OR10Z1  | 0 | 0 | 1 |
| 128371 | OR6K6   | 0 | 0 | 0 |
| 128372 | OR6N1   | 0 | 0 | 1 |
| 130075 | OR9A4   | 0 | 0 | 0 |
| 134083 | OR2Y1   | 0 | 0 | 0 |
| 135924 | OR9A2   | 0 | 0 | 0 |
| 135941 | OR2A14  | 0 | 0 | 0 |

|        |        |   |   |   |
|--------|--------|---|---|---|
| 135946 | OR6B1  | 0 | 0 | 0 |
| 135948 | OR2F2  | 0 | 0 | 0 |
| 138799 | OR13C5 | 0 | 0 | 0 |
| 138802 | OR13C8 | 0 | 0 | 0 |
| 138803 | OR13C3 | 0 | 0 | 0 |
| 138804 | OR13C4 | 0 | 0 | 0 |
| 138805 | OR13F1 | 0 | 0 | 0 |
| 138881 | OR1L8  | 1 | 0 | 0 |
| 138882 | OR1N2  | 0 | 0 | 0 |
| 138883 | OR1N1  | 0 | 0 | 1 |
| 143496 | OR52B4 | 0 | 0 | 0 |
| 143502 | OR52I2 | 0 | 0 | 0 |
| 143503 | OR51E1 | 0 | 0 | 1 |
| 144124 | OR10A5 | 0 | 0 | 0 |
| 144125 | OR2AG1 | 0 | 0 | 1 |
| 150681 | OR6B3  | 0 | 0 | 0 |
| 158131 | OR1Q1  | 0 | 0 | 0 |
| 162998 | OR7D2  | 0 | 0 | 0 |
| 196335 | OR56B4 | 0 | 0 | 0 |
| 219417 | OR8U1  | 0 | 0 | 0 |
| 219428 | OR4C16 | 0 | 0 | 0 |
| 219429 | OR4C11 | 0 | 0 | 0 |
| 219431 | OR4S2  | 0 | 0 | 0 |
| 219432 | OR4C6  | 0 | 0 | 0 |
| 219436 | OR5D14 | 0 | 0 | 0 |
| 219437 | OR5L1  | 0 | 0 | 0 |
| 219438 | OR5D18 | 1 | 0 | 0 |
| 219447 | OR5AS1 | 0 | 0 | 0 |
| 219453 | OR8K5  | 0 | 0 | 0 |
| 219464 | OR5T2  | 0 | 0 | 0 |
| 219469 | OR8H1  | 0 | 0 | 0 |
| 219473 | OR8K3  | 0 | 0 | 0 |
| 219477 | OR8J1  | 0 | 0 | 0 |
| 219479 | OR5R1  | 0 | 0 | 0 |
| 219482 | OR5M3  | 0 | 0 | 0 |
| 219484 | OR5M8  | 0 | 0 | 0 |
| 219487 | OR5M11 | 0 | 0 | 0 |
| 219493 | OR5AR1 | 1 | 0 | 0 |
| 219858 | OR8B12 | 0 | 0 | 0 |
| 219865 | OR8G5  | 0 | 0 | 0 |
| 219869 | OR10G8 | 0 | 0 | 0 |
| 219870 | OR10G9 | 0 | 0 | 0 |
| 219873 | OR10S1 | 0 | 0 | 0 |
| 219874 | OR6T1  | 0 | 0 | 0 |
| 219875 | OR4D5  | 0 | 0 | 0 |
| 219952 | OR6Q1  | 0 | 0 | 0 |
| 219954 | OR9I1  | 1 | 0 | 0 |
| 219956 | OR9Q1  | 0 | 0 | 1 |
| 219957 | OR9Q2  | 0 | 0 | 0 |
| 219958 | OR1S2  | 0 | 0 | 0 |
| 219959 | OR1S1  | 1 | 0 | 0 |
| 219960 | OR10Q1 | 0 | 0 | 0 |
| 219965 | OR5B17 | 0 | 0 | 0 |
| 219968 | OR5B21 | 0 | 0 | 0 |
| 219981 | OR5A2  | 0 | 0 | 0 |

|        |         |   |   |   |
|--------|---------|---|---|---|
| 219982 | OR5A1   | 0 | 0 | 0 |
| 219983 | OR4D6   | 0 | 0 | 0 |
| 219986 | OR4D11  | 1 | 0 | 0 |
| 254783 | OR6C74  | 0 | 0 | 0 |
| 254786 | OR6C3   | 0 | 0 | 0 |
| 254879 | OR2T6   | 1 | 0 | 0 |
| 254973 | OR1L4   | 0 | 0 | 0 |
| 255725 | OR52B2  | 0 | 0 | 0 |
| 256144 | OR4C3   | 1 | 0 | 0 |
| 256148 | OR4S1   | 0 | 0 | 0 |
| 256892 | OR51F1  | 0 | 0 | 1 |
| 282763 | OR51B5  | 0 | 0 | 1 |
| 282770 | OR10AG1 | 0 | 0 | 0 |
| 282775 | OR5J2   | 0 | 0 | 1 |
| 283092 | OR4C13  | 0 | 0 | 1 |
| 283093 | OR4C12  | 0 | 0 | 0 |
| 283111 | OR51V1  | 0 | 0 | 0 |
| 283159 | OR8D1   | 0 | 0 | 0 |
| 283160 | OR8D2   | 0 | 0 | 0 |
| 283162 | OR8B4   | 0 | 0 | 0 |
| 283189 | OR9G4   | 0 | 0 | 0 |
| 283297 | OR10A4  | 0 | 0 | 1 |
| 283365 | OR6C6   | 0 | 0 | 0 |
| 283694 | OR4N4   | 0 | 0 | 0 |
| 284383 | OR2Z1   | 0 | 0 | 0 |
| 284433 | OR10H5  | 0 | 0 | 0 |
| 284521 | OR2L13  | 0 | 0 | 0 |
| 284532 | OR14A16 | 0 | 0 | 0 |
| 285659 | OR2V2   | 0 | 0 | 0 |
| 286362 | OR13C9  | 0 | 0 | 0 |
| 286365 | OR13D1  | 0 | 0 | 0 |
| 338662 | OR8D4   | 0 | 0 | 0 |
| 338674 | OR5F1   | 0 | 0 | 0 |
| 338675 | OR5AP2  | 0 | 0 | 0 |
| 338751 | OR52L1  | 0 | 0 | 0 |
| 338755 | OR2AG2  | 0 | 0 | 0 |
| 340980 | OR52B6  | 0 | 0 | 0 |
| 341152 | OR2AT4  | 0 | 0 | 0 |
| 341276 | OR10A2  | 0 | 0 | 0 |
| 341416 | OR6C2   | 0 | 0 | 0 |
| 341418 | OR6C4   | 0 | 0 | 0 |
| 341568 | OR8S1   | 0 | 0 | 1 |
| 341799 | OR6S1   | 0 | 0 | 0 |
| 343169 | OR6F1   | 0 | 0 | 1 |
| 343171 | OR2W3   | 0 | 0 | 0 |
| 343172 | OR2T8   | 0 | 0 | 0 |
| 343173 | OR2T3   | 0 | 0 | 0 |
| 343406 | OR10R2  | 0 | 0 | 0 |
| 343563 | OR2T29  | 0 | 0 | 0 |
| 346517 | OR6V1   | 0 | 0 | 0 |
| 346525 | OR2A12  | 0 | 0 | 0 |
| 346528 | OR2A1   | 0 | 0 | 0 |
| 347168 | OR1J1   | 1 | 0 | 0 |
| 347169 | OR1B1   | 0 | 0 | 0 |
| 347468 | OR13H1  | 0 | 0 | 0 |

|        |        |   |   |   |
|--------|--------|---|---|---|
| 387748 | OR56B1 | 0 | 0 | 0 |
| 389090 | OR6B2  | 0 | 0 | 0 |
| 390036 | OR52K1 | 0 | 0 | 0 |
| 390037 | OR52I1 | 0 | 0 | 0 |
| 390038 | OR51D1 | 0 | 0 | 0 |
| 390054 | OR52A5 | 0 | 0 | 0 |
| 390058 | OR51B6 | 0 | 0 | 1 |
| 390059 | OR51M1 | 0 | 0 | 0 |
| 390061 | OR51Q1 | 0 | 0 | 0 |
| 390063 | OR51I1 | 0 | 0 | 0 |
| 390064 | OR51I2 | 0 | 0 | 0 |
| 390066 | OR52D1 | 0 | 0 | 0 |
| 390067 | OR52H1 | 0 | 0 | 0 |
| 390072 | OR52N4 | 0 | 0 | 0 |
| 390075 | OR52N5 | 0 | 0 | 0 |
| 390077 | OR52N2 | 1 | 0 | 0 |
| 390078 | OR52E6 | 0 | 0 | 0 |
| 390079 | OR52E8 | 0 | 0 | 0 |
| 390081 | OR52E4 | 0 | 0 | 0 |
| 390083 | OR56A3 | 0 | 0 | 0 |
| 390084 | OR56A5 | 0 | 0 | 0 |
| 390093 | OR10A6 | 0 | 0 | 0 |
| 390113 | OR4X1  | 0 | 0 | 1 |
| 390142 | OR5D13 | 0 | 0 | 0 |
| 390144 | OR5D16 | 0 | 0 | 0 |
| 390151 | OR8H2  | 0 | 0 | 0 |
| 390152 | OR8H3  | 0 | 0 | 0 |
| 390154 | OR5T3  | 0 | 0 | 0 |
| 390155 | OR5T1  | 0 | 0 | 0 |
| 390157 | OR8K1  | 0 | 0 | 0 |
| 390162 | OR5M9  | 0 | 0 | 0 |
| 390167 | OR5M10 | 0 | 0 | 0 |
| 390168 | OR5M1  | 0 | 0 | 1 |
| 390174 | OR9G1  | 0 | 0 | 0 |
| 390181 | OR5AK2 | 0 | 0 | 0 |
| 390191 | OR5B12 | 0 | 0 | 0 |
| 390195 | OR5AN1 | 0 | 0 | 0 |
| 390197 | OR4D10 | 0 | 0 | 0 |
| 390199 | OR4D9  | 0 | 0 | 0 |
| 390201 | OR10V1 | 0 | 0 | 0 |
| 390260 | OR6X1  | 0 | 0 | 0 |
| 390261 | OR6M1  | 0 | 0 | 0 |
| 390264 | OR10G4 | 0 | 0 | 0 |
| 390265 | OR10G7 | 0 | 0 | 0 |
| 390275 | OR8A1  | 0 | 0 | 0 |
| 390321 | OR6C1  | 0 | 0 | 0 |
| 390323 | OR6C75 | 0 | 0 | 0 |
| 390326 | OR6C76 | 1 | 0 | 0 |
| 390327 | OR6C70 | 0 | 0 | 0 |
| 390429 | OR4N2  | 0 | 0 | 0 |
| 390431 | OR4K2  | 0 | 0 | 0 |
| 390433 | OR4K13 | 0 | 0 | 0 |
| 390436 | OR4K17 | 0 | 0 | 0 |
| 390437 | OR4N5  | 0 | 0 | 0 |
| 390439 | OR11G2 | 0 | 0 | 0 |

|        |        |   |    |   |
|--------|--------|---|----|---|
| 390442 | OR11H4 | 0 | 0  | 0 |
| 390445 | OR5AU1 | 1 | 0  | 0 |
| 390538 | OR4M2  | 0 | 0  | 0 |
| 390648 | OR4F6  | 0 | 0  | 0 |
| 390649 | OR4F15 | 0 | 0  | 0 |
| 390882 | OR7G2  | 0 | 0  | 0 |
| 390883 | OR7G3  | 1 | 0  | 0 |
| 390892 | OR7A10 | 0 | 0  | 0 |
| 391107 | OR10K2 | 0 | 0  | 0 |
| 391109 | OR10K1 | 0 | 0  | 0 |
| 391112 | OR6Y1  | 0 | 0  | 1 |
| 391114 | OR6K3  | 0 | 0  | 0 |
| 391189 | OR11L1 | 0 | 0  | 0 |
| 391190 | OR2L8  | 0 | 0  | 0 |
| 391191 | OR2AK2 | 0 | 0  | 0 |
| 391192 | OR2L3  | 0 | 0  | 0 |
| 391194 | OR2M2  | 0 | 0  | 1 |
| 391195 | OR2T33 | 0 | 0  | 0 |
| 391196 | OR2M7  | 0 | 0  | 1 |
| 391211 | OR2G6  | 0 | 0  | 0 |
| 392138 | OR2A25 | 0 | 0  | 0 |
| 392309 | OR13J1 | 0 | 0  | 1 |
| 392376 | OR13C2 | 0 | 0  | 0 |
| 392390 | OR1L6  | 0 | 0  | 0 |
| 392391 | OR5C1  | 0 | 0  | 0 |
| 392392 | OR1K1  | 0 | 0  | 0 |
| 393046 | OR2A5  | 0 | 0  | 0 |
| 401427 | OR2A7  | 0 | 0  | 0 |
| 401665 | OR51T1 | 0 | 0  | 0 |
| 401666 | OR51A4 | 0 | 0  | 0 |
| 401667 | OR51A2 | 0 | 0  | 0 |
| 401992 | OR2T2  | 0 | 0  | 0 |
| 401993 | OR2T5  | 0 | 0  | 0 |
| 401994 | OR14I1 | 0 | 0  | 0 |
| 402135 | OR5K2  | 0 | 0  | 0 |
| 402317 | OR2A42 | 0 | 0  | 0 |
| 441608 | OR5B3  | 0 | 0  | 0 |
| 441639 | OR9K2  | 1 | 0  | 0 |
| 441669 | OR4Q3  | 0 | 0  | 0 |
| 441670 | OR4M1  | 0 | 0  | 0 |
| 441911 | OR10J3 | 0 | 0  | 0 |
| 441933 | OR13G1 | 0 | 0  | 1 |
| 442186 | OR2J3  | 0 | 0  | 1 |
| 442191 | OR14J1 | 0 | 0  | 1 |
| 442194 | OR10C1 | 0 | 0  | 0 |
| 442361 | OR2A2  | 0 | 0  | 0 |
| 504189 | OR8U8  | 0 | 0  | 0 |
| 2      | A2M    | 0 | 0  | 1 |
| 27     | ABL2   | 1 | 17 | 1 |
| 31     | ACACA  | 1 | 0  | 1 |
| 32     | ACACB  | 0 | 0  | 1 |
| 52     | ACP1   | 1 | 0  | 1 |
| 58     | ACTA1  | 1 | 0  | 1 |
| 59     | ACTA2  | 0 | 0  | 1 |
| 60     | ACTB   | 1 | 20 | 1 |

|     |          |   |    |   |
|-----|----------|---|----|---|
| 70  | ACTC1    | 1 | 0  | 1 |
| 71  | ACTG1    | 1 | 18 | 1 |
| 72  | ACTG2    | 1 | 0  | 1 |
| 90  | ACVR1    | 1 | 15 | 1 |
| 92  | ACVR2A   | 1 | 20 | 1 |
| 93  | ACVR2B   | 1 | 0  | 1 |
| 94  | ACVRL1   | 1 | 0  | 1 |
| 102 | ADAM10   | 1 | 0  | 1 |
| 107 | ADCY1    | 1 | 0  | 1 |
| 108 | ADCY2    | 1 | 0  | 1 |
| 109 | ADCY3    | 1 | 0  | 1 |
| 111 | ADCY5    | 1 | 0  | 1 |
| 112 | ADCY6    | 0 | 0  | 1 |
| 113 | ADCY7    | 1 | 0  | 1 |
| 114 | ADCY8    | 0 | 0  | 1 |
| 115 | ADCY9    | 1 | 0  | 1 |
| 135 | ADORA2A  | 0 | 0  | 1 |
| 136 | ADORA2B  | 0 | 0  | 1 |
| 146 | ADRA1D   | 0 | 0  | 1 |
| 147 | ADRA1B   | 0 | 0  | 1 |
| 148 | ADRA1A   | 0 | 0  | 1 |
| 153 | ADRB1    | 1 | 0  | 1 |
| 154 | ADRB2    | 0 | 0  | 1 |
| 155 | ADRB3    | 0 | 0  | 1 |
| 157 | GRK3     | 0 | 0  | 1 |
| 182 | JAG1     | 1 | 0  | 1 |
| 185 | AGTR1    | 1 | 0  | 1 |
| 269 | AMHR2    | 1 | 0  | 1 |
| 317 | APAF1    | 1 | 0  | 1 |
| 324 | APC      | 1 | 25 | 1 |
| 329 | BIRC2    | 1 | 0  | 1 |
| 330 | BIRC3    | 1 | 14 | 1 |
| 331 | XIAP     | 1 | 14 | 1 |
| 356 | FASLG    | 1 | 0  | 1 |
| 374 | AREG     | 1 | 0  | 1 |
| 406 | ARNTL    | 1 | 0  | 1 |
| 409 | ARRB2    | 0 | 0  | 1 |
| 434 | ASIP     | 1 | 0  | 1 |
| 462 | SERPINC1 | 1 | 0  | 1 |
| 487 | ATP2A1   | 1 | 0  | 1 |
| 488 | ATP2A2   | 1 | 0  | 1 |
| 489 | ATP2A3   | 0 | 0  | 1 |
| 552 | AVPR1A   | 0 | 0  | 1 |
| 553 | AVPR1B   | 0 | 0  | 1 |
| 598 | BCL2L1   | 1 | 12 | 1 |
| 613 | BCR      | 1 | 21 | 1 |
| 623 | BDKRB1   | 0 | 0  | 1 |
| 624 | BDKRB2   | 1 | 0  | 1 |
| 637 | BID      | 1 | 0  | 1 |
| 657 | BMPR1A   | 1 | 17 | 1 |
| 658 | BMPR1B   | 1 | 0  | 1 |
| 659 | BMPR2    | 1 | 0  | 1 |
| 673 | BRAF     | 1 | 22 | 1 |
| 685 | BTC      | 0 | 0  | 1 |
| 839 | CASP6    | 0 | 0  | 1 |

|      |         |   |    |   |
|------|---------|---|----|---|
| 857  | CAV1    | 0 | 0  | 1 |
| 858  | CAV2    | 0 | 0  | 1 |
| 859  | CAV3    | 0 | 0  | 1 |
| 861  | RUNX1   | 1 | 18 | 1 |
| 862  | RUNX1T1 | 1 | 20 | 1 |
| 886  | CCKAR   | 0 | 0  | 1 |
| 887  | CCKBR   | 0 | 0  | 1 |
| 891  | CCNB1   | 1 | 0  | 1 |
| 925  | CD8A    | 1 | 0  | 1 |
| 926  | CD8B    | 0 | 0  | 1 |
| 929  | CD14    | 0 | 0  | 1 |
| 930  | CD19    | 1 | 0  | 1 |
| 942  | CD86    | 1 | 0  | 1 |
| 948  | CD36    | 0 | 16 | 1 |
| 958  | CD40    | 0 | 0  | 1 |
| 960  | CD44    | 0 | 0  | 1 |
| 961  | CD47    | 0 | 0  | 1 |
| 962  | CD48    | 0 | 0  | 1 |
| 990  | CDC6    | 1 | 0  | 1 |
| 1022 | CDK7    | 1 | 0  | 1 |
| 1029 | CDKN2A  | 1 | 20 | 1 |
| 1031 | CDKN2C  | 1 | 12 | 1 |
| 1032 | CDKN2D  | 1 | 0  | 1 |
| 1050 | CEBPA   | 1 | 9  | 1 |
| 1072 | CFL1    | 1 | 0  | 1 |
| 1073 | CFL2    | 0 | 0  | 1 |
| 1080 | CFTR    | 1 | 0  | 1 |
| 1081 | CGA     | 1 | 0  | 1 |
| 1101 | CHAD    | 1 | 0  | 1 |
| 1128 | CHRM1   | 1 | 0  | 1 |
| 1129 | CHRM2   | 0 | 0  | 1 |
| 1131 | CHRM3   | 1 | 0  | 1 |
| 1132 | CHRM4   | 1 | 0  | 1 |
| 1133 | CHRM5   | 0 | 0  | 1 |
| 1154 | CISH    | 1 | 0  | 1 |
| 1270 | CNTF    | 1 | 0  | 1 |
| 1271 | CNTFR   | 1 | 0  | 1 |
| 1277 | COL1A1  | 1 | 21 | 1 |
| 1278 | COL1A2  | 1 | 0  | 1 |
| 1280 | COL2A1  | 1 | 22 | 1 |
| 1281 | COL3A1  | 1 | 0  | 1 |
| 1282 | COL4A1  | 1 | 0  | 1 |
| 1284 | COL4A2  | 1 | 0  | 1 |
| 1286 | COL4A4  | 0 | 0  | 1 |
| 1288 | COL4A6  | 1 | 0  | 1 |
| 1289 | COL5A1  | 1 | 0  | 1 |
| 1290 | COL5A2  | 1 | 0  | 1 |
| 1291 | COL6A1  | 1 | 0  | 1 |
| 1292 | COL6A2  | 0 | 0  | 1 |
| 1293 | COL6A3  | 0 | 0  | 1 |
| 1301 | COL11A1 | 1 | 0  | 1 |
| 1302 | COL11A2 | 1 | 0  | 1 |
| 1311 | COMP    | 0 | 0  | 1 |
| 1392 | CRH     | 1 | 0  | 1 |
| 1407 | CRY1    | 0 | 0  | 1 |

|      |         |   |    |   |
|------|---------|---|----|---|
| 1408 | CRY2    | 1 | 0  | 1 |
| 1432 | MAPK14  | 1 | 0  | 1 |
| 1437 | CSF2    | 1 | 0  | 1 |
| 1438 | CSF2RA  | 0 | 0  | 1 |
| 1439 | CSF2RB  | 1 | 0  | 1 |
| 1440 | CSF3    | 0 | 0  | 1 |
| 1441 | CSF3R   | 1 | 21 | 1 |
| 1442 | CSH1    | 0 | 0  | 1 |
| 1452 | CSNK1A1 | 1 | 0  | 1 |
| 1453 | CSNK1D  | 1 | 0  | 1 |
| 1454 | CSNK1E  | 1 | 0  | 1 |
| 1455 | CSNK1G2 | 1 | 0  | 1 |
| 1456 | CSNK1G3 | 1 | 0  | 1 |
| 1457 | CSNK2A1 | 1 | 0  | 1 |
| 1459 | CSNK2A2 | 1 | 0  | 1 |
| 1460 | CSNK2B  | 1 | 0  | 1 |
| 1489 | CTF1    | 1 | 0  | 1 |
| 1493 | CTLA4   | 1 | 15 | 1 |
| 1511 | CTSG    | 0 | 0  | 1 |
| 1535 | CYBA    | 0 | 0  | 1 |
| 1536 | CYBB    | 1 | 0  | 1 |
| 1605 | DAG1    | 1 | 0  | 1 |
| 1634 | DCN     | 1 | 0  | 1 |
| 1647 | GADD45A | 1 | 0  | 1 |
| 1676 | DFFA    | 0 | 0  | 1 |
| 1808 | DPYSL2  | 1 | 0  | 1 |
| 1812 | DRD1    | 1 | 0  | 1 |
| 1813 | DRD2    | 1 | 0  | 1 |
| 1816 | DRD5    | 1 | 0  | 1 |
| 1840 | DTX1    | 0 | 21 | 1 |
| 1843 | DUSP1   | 0 | 0  | 1 |
| 1844 | DUSP2   | 0 | 14 | 1 |
| 1845 | DUSP3   | 0 | 0  | 1 |
| 1846 | DUSP4   | 0 | 13 | 1 |
| 1847 | DUSP5   | 0 | 0  | 1 |
| 1848 | DUSP6   | 1 | 0  | 1 |
| 1849 | DUSP7   | 0 | 0  | 1 |
| 1850 | DUSP8   | 0 | 0  | 1 |
| 1852 | DUSP9   | 1 | 14 | 1 |
| 1869 | E2F1    | 1 | 0  | 1 |
| 1870 | E2F2    | 1 | 0  | 1 |
| 1871 | E2F3    | 1 | 19 | 1 |
| 1874 | E2F4    | 1 | 0  | 1 |
| 1875 | E2F5    | 1 | 0  | 1 |
| 1902 | LPAR1   | 1 | 0  | 1 |
| 1906 | EDN1    | 1 | 0  | 1 |
| 1909 | EDNRA   | 1 | 0  | 1 |
| 1942 | EFNA1   | 0 | 0  | 1 |
| 1943 | EFNA2   | 1 | 0  | 1 |
| 1944 | EFNA3   | 1 | 0  | 1 |
| 1945 | EFNA4   | 0 | 0  | 1 |
| 1946 | EFNA5   | 1 | 0  | 1 |
| 1950 | EGF     | 1 | 0  | 1 |
| 1977 | EIF4E   | 1 | 14 | 1 |
| 2047 | EPHB1   | 1 | 22 | 1 |

|      |        |   |    |   |
|------|--------|---|----|---|
| 2048 | EPHB2  | 1 | 0  | 1 |
| 2049 | EPHB3  | 1 | 0  | 1 |
| 2050 | EPHB4  | 1 | 20 | 1 |
| 2051 | EPHB6  | 0 | 0  | 1 |
| 2056 | EPO    | 1 | 0  | 1 |
| 2057 | EPOR   | 1 | 18 | 1 |
| 2069 | EREG   | 0 | 0  | 1 |
| 2081 | ERN1   | 1 | 0  | 1 |
| 2113 | ETS1   | 1 | 19 | 1 |
| 2122 | MECOM  | 1 | 22 | 1 |
| 2150 | F2RL1  | 1 | 0  | 1 |
| 2151 | F2RL2  | 0 | 0  | 1 |
| 2152 | F3     | 1 | 0  | 1 |
| 2153 | F5     | 1 | 0  | 1 |
| 2155 | F7     | 1 | 0  | 1 |
| 2157 | F8     | 1 | 0  | 1 |
| 2160 | F11    | 1 | 0  | 1 |
| 2162 | F13A1  | 1 | 0  | 1 |
| 2165 | F13B   | 0 | 0  | 1 |
| 2206 | MS4A2  | 0 | 0  | 1 |
| 2242 | FES    | 1 | 17 | 1 |
| 2243 | FGA    | 1 | 0  | 1 |
| 2244 | FGB    | 0 | 0  | 1 |
| 2246 | FGF1   | 0 | 0  | 1 |
| 2247 | FGF2   | 0 | 0  | 1 |
| 2248 | FGF3   | 1 | 16 | 1 |
| 2249 | FGF4   | 1 | 11 | 1 |
| 2250 | FGF5   | 0 | 0  | 1 |
| 2251 | FGF6   | 0 | 18 | 1 |
| 2252 | FGF7   | 0 | 0  | 1 |
| 2253 | FGF8   | 1 | 0  | 1 |
| 2254 | FGF9   | 1 | 0  | 1 |
| 2255 | FGF10  | 1 | 14 | 1 |
| 2256 | FGF11  | 0 | 0  | 1 |
| 2257 | FGF12  | 0 | 16 | 1 |
| 2258 | FGF13  | 1 | 0  | 1 |
| 2259 | FGF14  | 0 | 16 | 1 |
| 2266 | FGG    | 1 | 0  | 1 |
| 2277 | VEGFD  | 0 | 0  | 1 |
| 2308 | FOXO1  | 1 | 19 | 1 |
| 2309 | FOXO3  | 1 | 18 | 1 |
| 2323 | FLT3LG | 1 | 0  | 1 |
| 2335 | FN1    | 1 | 0  | 1 |
| 2353 | FOS    | 1 | 0  | 1 |
| 2488 | FSHB   | 1 | 0  | 1 |
| 2492 | FSHR   | 1 | 0  | 1 |
| 2648 | KAT2A  | 1 | 0  | 1 |
| 2688 | GH1    | 0 | 0  | 1 |
| 2689 | GH2    | 0 | 0  | 1 |
| 2690 | GHR    | 1 | 0  | 1 |
| 2697 | GJA1   | 1 | 0  | 1 |
| 2735 | GLI1   | 1 | 22 | 1 |
| 2736 | GLI2   | 1 | 0  | 1 |
| 2737 | GLI3   | 1 | 0  | 1 |
| 2782 | GNB1   | 1 | 21 | 1 |

|      |          |   |    |   |
|------|----------|---|----|---|
| 2784 | GNB3     | 1 | 0  | 1 |
| 2785 | GNG3     | 1 | 0  | 1 |
| 2796 | GNRH1    | 0 | 0  | 1 |
| 2797 | GNRH2    | 0 | 0  | 1 |
| 2810 | SFN      | 1 | 0  | 1 |
| 2811 | GP1BA    | 0 | 0  | 1 |
| 2812 | GP1BB    | 1 | 0  | 1 |
| 2814 | GP5      | 0 | 0  | 1 |
| 2815 | GP9      | 0 | 0  | 1 |
| 2872 | MKNK2    | 0 | 0  | 1 |
| 2892 | GRIA3    | 1 | 0  | 1 |
| 2925 | GRPR     | 0 | 0  | 1 |
| 2934 | GSN      | 1 | 0  | 1 |
| 2997 | GYS1     | 1 | 0  | 1 |
| 2998 | GYS2     | 0 | 0  | 1 |
| 3001 | GZMA     | 0 | 0  | 1 |
| 3002 | GZMB     | 0 | 0  | 1 |
| 3053 | SERPIND1 | 1 | 0  | 1 |
| 3082 | HGF      | 1 | 19 | 1 |
| 3084 | NRG1     | 1 | 17 | 1 |
| 3105 | HLA-A    | 0 | 15 | 1 |
| 3106 | HLA-B    | 0 | 16 | 1 |
| 3107 | HLA-C    | 0 | 12 | 1 |
| 3133 | HLA-E    | 0 | 0  | 1 |
| 3134 | HLA-F    | 0 | 0  | 1 |
| 3135 | HLA-G    | 0 | 0  | 1 |
| 3269 | HRH1     | 0 | 0  | 1 |
| 3274 | HRH2     | 0 | 0  | 1 |
| 3303 | HSPA1A   | 0 | 0  | 1 |
| 3304 | HSPA1B   | 0 | 0  | 1 |
| 3305 | HSPA1L   | 0 | 0  | 1 |
| 3306 | HSPA2    | 1 | 0  | 1 |
| 3310 | HSPA6    | 0 | 0  | 1 |
| 3312 | HSPA8    | 1 | 0  | 1 |
| 3339 | HSPG2    | 1 | 0  | 1 |
| 3356 | HTR2A    | 0 | 0  | 1 |
| 3357 | HTR2B    | 1 | 0  | 1 |
| 3358 | HTR2C    | 1 | 0  | 1 |
| 3360 | HTR4     | 1 | 0  | 1 |
| 3361 | HTR5A    | 0 | 0  | 1 |
| 3362 | HTR6     | 0 | 0  | 1 |
| 3363 | HTR7     | 0 | 0  | 1 |
| 3371 | TNC      | 0 | 0  | 1 |
| 3381 | IBSP     | 0 | 0  | 1 |
| 3439 | IFNA1    | 0 | 0  | 1 |
| 3440 | IFNA2    | 0 | 0  | 1 |
| 3441 | IFNA4    | 0 | 0  | 1 |
| 3442 | IFNA5    | 0 | 0  | 1 |
| 3443 | IFNA6    | 0 | 0  | 1 |
| 3444 | IFNA7    | 0 | 0  | 1 |
| 3445 | IFNA8    | 0 | 0  | 1 |
| 3446 | IFNA10   | 0 | 0  | 1 |
| 3447 | IFNA13   | 0 | 0  | 1 |
| 3448 | IFNA14   | 0 | 0  | 1 |
| 3449 | IFNA16   | 0 | 0  | 0 |

|      |         |   |    |   |
|------|---------|---|----|---|
| 3451 | IFNA17  | 0 | 0  | 1 |
| 3452 | IFNA21  | 0 | 0  | 0 |
| 3454 | IFNAR1  | 0 | 0  | 1 |
| 3455 | IFNAR2  | 0 | 0  | 1 |
| 3456 | IFNB1   | 0 | 0  | 1 |
| 3458 | IFNG    | 1 | 0  | 1 |
| 3459 | IFNGR1  | 0 | 18 | 1 |
| 3460 | IFNGR2  | 0 | 0  | 1 |
| 3467 | IFNW1   | 1 | 0  | 0 |
| 3486 | IGFBP3  | 1 | 0  | 1 |
| 3516 | RBPJ    | 1 | 0  | 1 |
| 3552 | IL1A    | 1 | 0  | 1 |
| 3553 | IL1B    | 1 | 0  | 1 |
| 3558 | IL2     | 0 | 8  | 1 |
| 3559 | IL2RA   | 1 | 0  | 1 |
| 3560 | IL2RB   | 1 | 0  | 1 |
| 3561 | IL2RG   | 1 | 0  | 1 |
| 3562 | IL3     | 1 | 10 | 1 |
| 3563 | IL3RA   | 0 | 0  | 1 |
| 3565 | IL4     | 1 | 0  | 1 |
| 3566 | IL4R    | 1 | 0  | 1 |
| 3567 | IL5     | 1 | 0  | 1 |
| 3568 | IL5RA   | 0 | 0  | 1 |
| 3569 | IL6     | 0 | 0  | 1 |
| 3570 | IL6R    | 0 | 0  | 1 |
| 3572 | IL6ST   | 1 | 18 | 1 |
| 3574 | IL7     | 0 | 0  | 1 |
| 3575 | IL7R    | 0 | 16 | 1 |
| 3578 | IL9     | 1 | 0  | 1 |
| 3581 | IL9R    | 1 | 0  | 1 |
| 3586 | IL10    | 0 | 13 | 1 |
| 3587 | IL10RA  | 1 | 0  | 1 |
| 3588 | IL10RB  | 0 | 0  | 1 |
| 3589 | IL11    | 0 | 0  | 1 |
| 3590 | IL11RA  | 1 | 0  | 1 |
| 3592 | IL12A   | 0 | 0  | 1 |
| 3593 | IL12B   | 0 | 0  | 1 |
| 3594 | IL12RB1 | 1 | 0  | 1 |
| 3595 | IL12RB2 | 0 | 0  | 1 |
| 3596 | IL13    | 0 | 0  | 1 |
| 3597 | IL13RA1 | 1 | 0  | 1 |
| 3598 | IL13RA2 | 0 | 0  | 1 |
| 3600 | IL15    | 1 | 0  | 1 |
| 3601 | IL15RA  | 0 | 0  | 1 |
| 3630 | INS     | 1 | 0  | 1 |
| 3656 | IRAK2   | 0 | 0  | 1 |
| 3661 | IRF3    | 0 | 0  | 1 |
| 3663 | IRF5    | 0 | 0  | 1 |
| 3665 | IRF7    | 0 | 0  | 1 |
| 3681 | ITGAD   | 0 | 0  | 1 |
| 3682 | ITGAE   | 0 | 0  | 1 |
| 3687 | ITGAX   | 0 | 0  | 1 |
| 3702 | ITK     | 0 | 20 | 1 |
| 3706 | ITPKA   | 0 | 0  | 1 |
| 3707 | ITPKB   | 1 | 0  | 1 |

|      |         |   |    |   |
|------|---------|---|----|---|
| 3714 | JAG2    | 1 | 0  | 1 |
| 3716 | JAK1    | 1 | 21 | 1 |
| 3717 | JAK2    | 1 | 21 | 1 |
| 3718 | JAK3    | 1 | 21 | 1 |
| 3725 | JUN     | 1 | 16 | 1 |
| 3745 | KCNB1   | 1 | 0  | 1 |
| 3784 | KCNQ1   | 0 | 0  | 1 |
| 3806 | KIR2DS1 | 0 | 0  | 1 |
| 3808 | KIR2DS3 | 0 | 0  | 1 |
| 3809 | KIR2DS4 | 0 | 0  | 1 |
| 3810 | KIR2DS5 | 0 | 0  | 1 |
| 3822 | KLRC2   | 1 | 0  | 1 |
| 3823 | KLRC3   | 0 | 0  | 1 |
| 3908 | LAMA2   | 1 | 0  | 1 |
| 3909 | LAMA3   | 1 | 0  | 1 |
| 3910 | LAMA4   | 1 | 0  | 1 |
| 3911 | LAMA5   | 1 | 0  | 1 |
| 3912 | LAMB1   | 1 | 0  | 1 |
| 3913 | LAMB2   | 1 | 0  | 1 |
| 3914 | LAMB3   | 1 | 0  | 1 |
| 3915 | LAMC1   | 1 | 0  | 1 |
| 3918 | LAMC2   | 1 | 0  | 1 |
| 3952 | LEP     | 1 | 0  | 1 |
| 3953 | LEPR    | 1 | 0  | 1 |
| 3955 | LFNG    | 1 | 0  | 1 |
| 3972 | LHB     | 1 | 0  | 1 |
| 3976 | LIF     | 1 | 0  | 1 |
| 3977 | LIFR    | 1 | 19 | 1 |
| 3983 | ABLIM1  | 1 | 0  | 1 |
| 3991 | LIPE    | 1 | 0  | 1 |
| 4049 | LTA     | 0 | 0  | 1 |
| 4050 | LTB     | 0 | 9  | 1 |
| 4055 | LTBR    | 0 | 0  | 1 |
| 4091 | SMAD6   | 1 | 0  | 1 |
| 4092 | SMAD7   | 1 | 0  | 1 |
| 4149 | MAX     | 1 | 14 | 1 |
| 4194 | MDM4    | 1 | 13 | 1 |
| 4215 | MAP3K3  | 1 | 0  | 1 |
| 4217 | MAP3K5  | 1 | 0  | 1 |
| 4242 | MFNG    | 0 | 0  | 1 |
| 4254 | KITLG   | 1 | 0  | 1 |
| 4261 | CIITA   | 0 | 24 | 1 |
| 4286 | MITF    | 1 | 17 | 1 |
| 4313 | MMP2    | 1 | 0  | 1 |
| 4342 | MOS     | 0 | 0  | 1 |
| 4352 | MPL     | 1 | 17 | 1 |
| 4609 | MYC     | 1 | 17 | 1 |
| 4616 | GADD45B | 1 | 3  | 1 |
| 4688 | NCF2    | 0 | 0  | 1 |
| 4689 | NCF4    | 1 | 0  | 1 |
| 4747 | NEFL    | 0 | 0  | 1 |
| 4763 | NF1     | 1 | 26 | 1 |
| 4772 | NFATC1  | 1 | 0  | 1 |
| 4773 | NFATC2  | 1 | 20 | 1 |
| 4775 | NFATC3  | 1 | 0  | 1 |

|      |           |   |    |   |
|------|-----------|---|----|---|
| 4776 | NFATC4    | 1 | 0  | 1 |
| 4790 | NFKB1     | 1 | 0  | 1 |
| 4792 | NFKBIA    | 1 | 18 | 1 |
| 4800 | NFYA      | 1 | 0  | 1 |
| 4801 | NFYB      | 1 | 0  | 1 |
| 4802 | NFYC      | 1 | 0  | 1 |
| 4846 | NOS3      | 1 | 0  | 1 |
| 4862 | NPAS2     | 1 | 0  | 1 |
| 4923 | NTSR1     | 1 | 0  | 1 |
| 4982 | TNFRSF11B | 1 | 0  | 1 |
| 5008 | OSM       | 0 | 0  | 1 |
| 5021 | OXTR      | 1 | 0  | 1 |
| 5104 | SERPINA5  | 1 | 0  | 1 |
| 5132 | PDC       | 0 | 0  | 1 |
| 5136 | PDE1A     | 0 | 0  | 1 |
| 5137 | PDE1C     | 0 | 0  | 1 |
| 5139 | PDE3A     | 1 | 0  | 1 |
| 5140 | PDE3B     | 0 | 0  | 1 |
| 5153 | PDE1B     | 1 | 0  | 1 |
| 5154 | PDGFA     | 1 | 0  | 1 |
| 5155 | PDGFB     | 1 | 13 | 1 |
| 5187 | PER1      | 0 | 23 | 1 |
| 5216 | PFN1      | 1 | 0  | 1 |
| 5217 | PFN2      | 0 | 0  | 1 |
| 5228 | PGF       | 0 | 0  | 1 |
| 5265 | SERPINA1  | 0 | 0  | 1 |
| 5305 | PIP4K2A   | 1 | 0  | 1 |
| 5319 | PLA2G1B   | 0 | 0  | 1 |
| 5320 | PLA2G2A   | 0 | 0  | 1 |
| 5321 | PLA2G4A   | 1 | 0  | 1 |
| 5322 | PLA2G5    | 0 | 0  | 1 |
| 5329 | PLAUR     | 1 | 0  | 1 |
| 5330 | PLCB2     | 1 | 0  | 1 |
| 5331 | PLCB3     | 1 | 0  | 1 |
| 5332 | PLCB4     | 1 | 0  | 1 |
| 5337 | PLD1      | 0 | 0  | 1 |
| 5345 | SERPINF2  | 0 | 0  | 1 |
| 5347 | PLK1      | 1 | 0  | 1 |
| 5371 | PML       | 1 | 22 | 1 |
| 5443 | POMC      | 1 | 0  | 1 |
| 5494 | PPM1A     | 1 | 0  | 1 |
| 5495 | PPM1B     | 1 | 0  | 1 |
| 5506 | PPP1R3A   | 0 | 0  | 1 |
| 5507 | PPP1R3C   | 1 | 0  | 1 |
| 5509 | PPP1R3D   | 0 | 0  | 0 |
| 5520 | PPP2R2A   | 1 | 22 | 1 |
| 5521 | PPP2R2B   | 1 | 0  | 1 |
| 5522 | PPP2R2C   | 0 | 0  | 1 |
| 5536 | PPP5C     | 1 | 0  | 1 |
| 5562 | PRKAA1    | 1 | 0  | 1 |
| 5563 | PRKAA2    | 0 | 0  | 1 |
| 5564 | PRKAB1    | 1 | 0  | 1 |
| 5565 | PRKAB2    | 1 | 0  | 1 |
| 5571 | PRKAG1    | 1 | 0  | 1 |
| 5573 | PRKAR1A   | 1 | 15 | 1 |

|      |         |   |    |   |
|------|---------|---|----|---|
| 5575 | PRKAR1B | 0 | 0  | 1 |
| 5576 | PRKAR2A | 1 | 0  | 1 |
| 5577 | PRKAR2B | 1 | 0  | 1 |
| 5580 | PRKCD   | 1 | 0  | 1 |
| 5581 | PRKCE   | 1 | 0  | 1 |
| 5583 | PRKCH   | 1 | 0  | 1 |
| 5588 | PRKCQ   | 1 | 0  | 1 |
| 5591 | PRKDC   | 1 | 26 | 1 |
| 5592 | PRKG1   | 1 | 0  | 1 |
| 5593 | PRKG2   | 0 | 0  | 1 |
| 5598 | MAPK7   | 1 | 0  | 1 |
| 5600 | MAPK11  | 0 | 0  | 1 |
| 5603 | MAPK13  | 0 | 0  | 1 |
| 5606 | MAP2K3  | 1 | 0  | 1 |
| 5607 | MAP2K5  | 1 | 0  | 1 |
| 5608 | MAP2K6  | 1 | 0  | 1 |
| 5617 | PRL     | 1 | 0  | 1 |
| 5618 | PRLR    | 1 | 0  | 1 |
| 5644 | PRSS1   | 0 | 19 | 1 |
| 5645 | PRSS2   | 0 | 0  | 1 |
| 5646 | PRSS3   | 0 | 0  | 1 |
| 5649 | RELN    | 1 | 24 | 1 |
| 5663 | PSEN1   | 1 | 0  | 1 |
| 5664 | PSEN2   | 1 | 0  | 1 |
| 5720 | PSME1   | 0 | 0  | 1 |
| 5721 | PSME2   | 0 | 0  | 1 |
| 5724 | PTAFR   | 0 | 0  | 1 |
| 5726 | TAS2R38 | 0 | 0  | 1 |
| 5731 | PTGER1  | 0 | 0  | 1 |
| 5733 | PTGER3  | 0 | 0  | 1 |
| 5737 | PTGFR   | 1 | 0  | 1 |
| 5770 | PTPN1   | 1 | 14 | 1 |
| 5778 | PTPN7   | 0 | 0  | 1 |
| 5787 | PTPRB   | 1 | 21 | 1 |
| 5792 | PTPRF   | 1 | 0  | 1 |
| 5795 | PTPRJ   | 1 | 0  | 1 |
| 5797 | PTPRM   | 1 | 0  | 1 |
| 5801 | PTPRR   | 0 | 0  | 1 |
| 5817 | PVR     | 0 | 0  | 1 |
| 5818 | NECTIN1 | 0 | 0  | 1 |
| 5819 | NECTIN2 | 1 | 0  | 1 |
| 5829 | PXN     | 1 | 0  | 1 |
| 5834 | PYGB    | 0 | 0  | 1 |
| 5836 | PYGL    | 1 | 0  | 1 |
| 5837 | PYGM    | 1 | 0  | 1 |
| 5871 | MAP4K2  | 1 | 0  | 1 |
| 5914 | RARA    | 1 | 19 | 1 |
| 5923 | RASGRF1 | 1 | 0  | 1 |
| 5924 | RASGRF2 | 1 | 0  | 1 |
| 5925 | RB1     | 1 | 21 | 1 |
| 5933 | RBL1    | 1 | 0  | 1 |
| 5934 | RBL2    | 1 | 0  | 1 |
| 5970 | RELA    | 1 | 0  | 1 |
| 5986 | RFNG    | 1 | 0  | 1 |
| 5993 | RFX5    | 1 | 0  | 1 |

|      |         |   |    |   |
|------|---------|---|----|---|
| 5994 | RFXAP   | 1 | 0  | 1 |
| 5998 | RGS3    | 0 | 0  | 1 |
| 6195 | RPS6KA1 | 0 | 0  | 1 |
| 6196 | RPS6KA2 | 0 | 0  | 1 |
| 6197 | RPS6KA3 | 1 | 0  | 1 |
| 6198 | RPS6KB1 | 1 | 0  | 1 |
| 6199 | RPS6KB2 | 0 | 18 | 1 |
| 6300 | MAPK12  | 0 | 0  | 1 |
| 6382 | SDC1    | 1 | 0  | 1 |
| 6383 | SDC2    | 0 | 0  | 1 |
| 6385 | SDC4    | 0 | 17 | 1 |
| 6387 | CXCL12  | 1 | 0  | 1 |
| 6416 | MAP2K4  | 1 | 17 | 1 |
| 6422 | SFRP1   | 1 | 0  | 1 |
| 6423 | SFRP2   | 1 | 0  | 1 |
| 6424 | SFRP4   | 0 | 15 | 1 |
| 6425 | SFRP5   | 1 | 0  | 1 |
| 6494 | SIPA1   | 1 | 0  | 1 |
| 6500 | SKP1    | 1 | 0  | 1 |
| 6558 | SLC12A2 | 1 | 0  | 1 |
| 6585 | SLIT1   | 1 | 0  | 1 |
| 6647 | SOD1    | 1 | 0  | 1 |
| 6667 | SP1     | 1 | 0  | 1 |
| 6688 | SPI1    | 1 | 0  | 1 |
| 6696 | SPP1    | 1 | 0  | 1 |
| 6772 | STAT1   | 1 | 0  | 1 |
| 6773 | STAT2   | 0 | 0  | 1 |
| 6774 | STAT3   | 1 | 19 | 1 |
| 6775 | STAT4   | 1 | 20 | 1 |
| 6776 | STAT5A  | 1 | 20 | 1 |
| 6777 | STAT5B  | 1 | 21 | 1 |
| 6778 | STAT6   | 1 | 23 | 1 |
| 6788 | STK3    | 0 | 0  | 1 |
| 6789 | STK4    | 0 | 0  | 1 |
| 6865 | TACR2   | 1 | 0  | 1 |
| 6868 | ADAM17  | 1 | 0  | 1 |
| 6869 | TACR1   | 0 | 0  | 1 |
| 6870 | TACR3   | 0 | 0  | 1 |
| 6885 | MAP3K7  | 1 | 18 | 1 |
| 6915 | TBXA2R  | 1 | 0  | 1 |
| 6932 | TCF7    | 1 | 0  | 1 |
| 6934 | TCF7L2  | 1 | 20 | 1 |
| 7027 | TFDP1   | 1 | 0  | 1 |
| 7035 | TFPI    | 1 | 0  | 1 |
| 7039 | TGFA    | 1 | 0  | 1 |
| 7044 | LEFTY2  | 1 | 0  | 1 |
| 7057 | THBS1   | 1 | 0  | 1 |
| 7058 | THBS2   | 1 | 0  | 1 |
| 7059 | THBS3   | 0 | 0  | 1 |
| 7060 | THBS4   | 0 | 0  | 1 |
| 7070 | THY1    | 0 | 0  | 1 |
| 7074 | TIAM1   | 1 | 0  | 1 |
| 7097 | TLR2    | 0 | 0  | 1 |
| 7098 | TLR3    | 0 | 0  | 1 |
| 7100 | TLR5    | 0 | 0  | 1 |

|      |               |   |    |   |
|------|---------------|---|----|---|
| 7124 | TNF           | 1 | 0  | 1 |
| 7143 | TNR           | 1 | 0  | 1 |
| 7148 | TNXB          | 0 | 0  | 1 |
| 7173 | TPO           | 0 | 0  | 1 |
| 7201 | TRHR          | 0 | 0  | 1 |
| 7248 | TSC1          | 1 | 21 | 1 |
| 7252 | TSHB          | 0 | 0  | 1 |
| 7253 | TSHR          | 1 | 20 | 1 |
| 7297 | TYK2          | 0 | 23 | 1 |
| 7299 | TYR           | 1 | 0  | 1 |
| 7412 | VCAM1         | 1 | 0  | 1 |
| 7422 | VEGFA         | 1 | 14 | 1 |
| 7423 | VEGFB         | 0 | 0  | 1 |
| 7424 | VEGFC         | 1 | 0  | 1 |
| 7448 | VTN           | 0 | 0  | 1 |
| 7450 | VWF           | 1 | 0  | 1 |
| 7465 | WEE1          | 1 | 0  | 1 |
| 7525 | YES1          | 1 | 19 | 1 |
| 8027 | STAM          | 1 | 0  | 1 |
| 8074 | FGF23         | 0 | 17 | 1 |
| 8302 | KLRC4         | 0 | 0  | 1 |
| 8394 | PIP5K1A       | 0 | 0  | 1 |
| 8395 | PIP5K1B       | 0 | 0  | 1 |
| 8396 | PIP4K2B       | 1 | 0  | 1 |
| 8398 | PLA2G6        | 1 | 0  | 1 |
| 8399 | PLA2G10       | 0 | 0  | 1 |
| 8408 | ULK1          | 1 | 0  | 1 |
| 8454 | CUL1          | 1 | 0  | 1 |
| 8482 | SEMA7A        | 0 | 0  | 1 |
| 8569 | MKNK1         | 0 | 17 | 1 |
| 8600 | TNFSF11       | 0 | 0  | 1 |
| 8625 | RFXANK        | 0 | 0  | 1 |
| 8633 | UNC5C         | 1 | 0  | 1 |
| 8646 | CHRD          | 1 | 0  | 1 |
| 8650 | NUMB          | 1 | 0  | 1 |
| 8651 | SOCS1         | 1 | 10 | 1 |
| 8681 | JMJD7-PLA2G4B | 0 | 0  | 0 |
| 8740 | TNFSF14       | 0 | 0  | 1 |
| 8743 | TNFSF10       | 0 | 0  | 1 |
| 8764 | TNFRSF14      | 0 | 12 | 1 |
| 8771 | TNFRSF6B      | 1 | 0  | 1 |
| 8792 | TNFRSF11A     | 0 | 18 | 1 |
| 8817 | FGF18         | 1 | 0  | 1 |
| 8822 | FGF17         | 0 | 0  | 1 |
| 8823 | FGF16         | 1 | 0  | 1 |
| 8835 | SOCS2         | 0 | 12 | 1 |
| 8837 | CFLAR         | 1 | 0  | 1 |
| 8850 | KAT2B         | 1 | 0  | 1 |
| 8863 | PER3          | 0 | 0  | 1 |
| 8864 | PER2          | 1 | 0  | 1 |
| 8874 | ARHGEF7       | 1 | 0  | 1 |
| 8877 | SPHK1         | 1 | 0  | 1 |
| 8915 | BCL10         | 1 | 10 | 1 |
| 8945 | BTRC          | 1 | 0  | 1 |
| 9002 | F2RL3         | 0 | 0  | 1 |

|       |         |   |    |   |
|-------|---------|---|----|---|
| 9021  | SOCS3   | 1 | 11 | 1 |
| 9047  | SH2D2A  | 0 | 0  | 1 |
| 9133  | CCNB2   | 1 | 0  | 1 |
| 9180  | OSMR    | 0 | 0  | 1 |
| 9181  | ARHGEF2 | 1 | 0  | 1 |
| 9241  | NOG     | 1 | 0  | 1 |
| 9252  | RPS6KA5 | 1 | 0  | 1 |
| 9253  | NUMBL   | 1 | 0  | 1 |
| 9350  | CER1    | 0 | 0  | 1 |
| 9353  | SLIT2   | 1 | 0  | 1 |
| 9423  | NTN1    | 1 | 0  | 1 |
| 9451  | EIF2AK3 | 1 | 0  | 1 |
| 9470  | EIF4E2  | 1 | 0  | 1 |
| 9541  | CIR1    | 1 | 0  | 1 |
| 9542  | NRG2    | 1 | 0  | 1 |
| 9575  | CLOCK   | 1 | 0  | 1 |
| 9612  | NCOR2   | 1 | 23 | 1 |
| 9655  | SOCS5   | 0 | 0  | 1 |
| 9672  | SDC3    | 0 | 0  | 1 |
| 9693  | RAPGEF2 | 1 | 0  | 1 |
| 9706  | ULK2    | 0 | 0  | 1 |
| 9794  | MAML1   | 1 | 0  | 1 |
| 9863  | MAGI2   | 1 | 0  | 1 |
| 9899  | SV2B    | 1 | 0  | 1 |
| 9900  | SV2A    | 1 | 0  | 1 |
| 9965  | FGF19   | 1 | 11 | 1 |
| 9978  | RBX1    | 1 | 0  | 1 |
| 10093 | ARPC4   | 1 | 0  | 0 |
| 10094 | ARPC3   | 1 | 0  | 1 |
| 10095 | ARPC1B  | 0 | 0  | 1 |
| 10109 | ARPC2   | 1 | 0  | 1 |
| 10125 | RASGRP1 | 0 | 0  | 1 |
| 10154 | PLXNC1  | 1 | 0  | 1 |
| 10197 | PSME3   | 1 | 0  | 1 |
| 10235 | RASGRP2 | 1 | 0  | 1 |
| 10254 | STAM2   | 1 | 0  | 1 |
| 10297 | APC2    | 1 | 0  | 1 |
| 10319 | LAMC3   | 1 | 0  | 1 |
| 10411 | RAPGEF3 | 0 | 0  | 1 |
| 10452 | TOMM40  | 1 | 0  | 1 |
| 10468 | FST     | 1 | 0  | 1 |
| 10505 | SEMA4F  | 0 | 0  | 1 |
| 10507 | SEMA4D  | 1 | 0  | 1 |
| 10509 | SEMA4B  | 0 | 0  | 1 |
| 10552 | ARPC1A  | 0 | 0  | 1 |
| 10603 | SH2B2   | 1 | 0  | 1 |
| 10637 | LEFTY1  | 1 | 0  | 1 |
| 10666 | CD226   | 0 | 0  | 1 |
| 10683 | DLL3    | 1 | 0  | 1 |
| 10718 | NRG3    | 0 | 0  | 1 |
| 10725 | NFAT5   | 1 | 0  | 1 |
| 10788 | IQGAP2  | 0 | 0  | 1 |
| 10800 | CYSLTR1 | 0 | 0  | 1 |
| 10870 | HCST    | 0 | 0  | 1 |
| 10892 | MALT1   | 1 | 15 | 1 |

|       |         |   |    |   |
|-------|---------|---|----|---|
| 10912 | GADD45G | 0 | 0  | 1 |
| 11009 | IL24    | 0 | 0  | 1 |
| 11069 | RAPGEF4 | 1 | 0  | 1 |
| 11072 | DUSP14  | 1 | 0  | 1 |
| 11186 | RASSF1  | 1 | 0  | 1 |
| 11197 | WIF1    | 1 | 20 | 1 |
| 11213 | IRAK3   | 0 | 0  | 1 |
| 11221 | DUSP10  | 1 | 0  | 1 |
| 11317 | RBPJL   | 1 | 0  | 1 |
| 22798 | LAMB4   | 0 | 0  | 1 |
| 22885 | ABLIM3  | 0 | 0  | 1 |
| 22926 | ATF6    | 0 | 0  | 1 |
| 22987 | SV2C    | 1 | 0  | 1 |
| 23220 | DTX4    | 1 | 0  | 1 |
| 23236 | PLCB1   | 1 | 0  | 1 |
| 23291 | FBXW11  | 1 | 0  | 1 |
| 23308 | ICOSLG  | 0 | 13 | 1 |
| 23385 | NCSTN   | 1 | 16 | 1 |
| 23433 | RHOQ    | 0 | 0  | 1 |
| 23529 | CLCF1   | 1 | 0  | 1 |
| 25780 | RASGRP3 | 0 | 0  | 1 |
| 25945 | NECTIN3 | 1 | 0  | 1 |
| 25989 | ULK3    | 0 | 0  | 1 |
| 26230 | TIAM2   | 0 | 0  | 1 |
| 26279 | PLA2G2D | 0 | 0  | 1 |
| 26281 | FGF20   | 0 | 0  | 1 |
| 26291 | FGF21   | 0 | 0  | 1 |
| 27006 | FGF22   | 0 | 0  | 0 |
| 27035 | NOX1    | 1 | 0  | 1 |
| 27330 | RPS6KA6 | 0 | 0  | 1 |
| 28514 | DLL1    | 1 | 0  | 1 |
| 29949 | IL19    | 0 | 0  | 1 |
| 29984 | RHOD    | 0 | 0  | 1 |
| 30814 | PLA2G2E | 0 | 0  | 1 |
| 30837 | SOCS7   | 1 | 0  | 1 |
| 50487 | PLA2G3  | 1 | 0  | 1 |
| 50508 | NOX3    | 0 | 0  | 1 |
| 50509 | COL5A3  | 0 | 0  | 1 |
| 50604 | IL20    | 0 | 0  | 1 |
| 50615 | IL21R   | 0 | 21 | 1 |
| 50616 | IL22    | 0 | 0  | 1 |
| 50831 | TAS2R3  | 0 | 0  | 0 |
| 50832 | TAS2R4  | 0 | 0  | 0 |
| 50833 | TAS2R16 | 0 | 0  | 1 |
| 50834 | TAS2R1  | 0 | 0  | 1 |
| 50835 | TAS2R9  | 0 | 0  | 1 |
| 50836 | TAS2R8  | 0 | 0  | 0 |
| 50837 | TAS2R7  | 0 | 0  | 0 |
| 50838 | TAS2R13 | 1 | 0  | 1 |
| 50839 | TAS2R10 | 0 | 0  | 1 |
| 50840 | TAS2R14 | 0 | 0  | 1 |
| 50848 | F11R    | 1 | 0  | 1 |
| 50855 | PARD6A  | 0 | 0  | 1 |
| 51107 | APH1A   | 1 | 14 | 1 |
| 51176 | LEF1    | 1 | 15 | 1 |

|       |          |   |    |   |
|-------|----------|---|----|---|
| 51206 | GP6      | 0 | 0  | 1 |
| 51422 | PRKAG2   | 1 | 0  | 1 |
| 51561 | IL23A    | 0 | 0  | 1 |
| 51701 | NLK      | 1 | 0  | 1 |
| 51764 | GNG13    | 0 | 0  | 0 |
| 53632 | PRKAG3   | 0 | 0  | 1 |
| 53832 | IL20RA   | 0 | 0  | 1 |
| 53833 | IL20RB   | 0 | 0  | 1 |
| 53944 | CSNK1G1  | 1 | 0  | 1 |
| 54106 | TLR9     | 1 | 0  | 1 |
| 54205 | CYCS     | 1 | 0  | 1 |
| 54429 | TAS2R5   | 0 | 0  | 0 |
| 54472 | TOLLIP   | 0 | 0  | 1 |
| 54567 | DLL4     | 1 | 0  | 1 |
| 54910 | SEMA4C   | 1 | 0  | 1 |
| 55534 | MAML3    | 0 | 0  | 1 |
| 55740 | ENAH     | 1 | 0  | 1 |
| 55844 | PPP2R2D  | 0 | 0  | 1 |
| 55851 | PSENEN   | 1 | 0  | 1 |
| 56034 | PDGFC    | 1 | 0  | 1 |
| 56413 | LTB4R2   | 0 | 0  | 1 |
| 56832 | IFNK     | 0 | 0  | 1 |
| 56848 | SPHK2    | 1 | 0  | 1 |
| 56998 | CTNNBIP1 | 1 | 0  | 1 |
| 57105 | CYSLTR2  | 0 | 19 | 1 |
| 57154 | SMURF1   | 1 | 0  | 1 |
| 57369 | GJD2     | 1 | 0  | 1 |
| 57680 | CHD8     | 1 | 0  | 1 |
| 57715 | SEMA4G   | 0 | 0  | 0 |
| 58494 | JAM2     | 0 | 0  | 1 |
| 58985 | IL22RA1  | 0 | 0  | 1 |
| 59067 | IL21     | 0 | 0  | 1 |
| 59343 | SENP2    | 1 | 0  | 1 |
| 63923 | TNN      | 0 | 0  | 1 |
| 64109 | CRLF2    | 0 | 9  | 1 |
| 64218 | SEMA4A   | 0 | 0  | 1 |
| 64221 | ROBO3    | 1 | 0  | 1 |
| 64321 | SOX17    | 1 | 15 | 1 |
| 64600 | PLA2G2F  | 0 | 0  | 0 |
| 64750 | SMURF2   | 1 | 0  | 1 |
| 64840 | PORCN    | 1 | 0  | 1 |
| 79139 | DERL1    | 1 | 0  | 1 |
| 79660 | PPP1R3B  | 0 | 0  | 1 |
| 79837 | PIP4K2C  | 0 | 0  | 1 |
| 80301 | PLEKHO2  | 0 | 0  | 0 |
| 80310 | PDGFD    | 0 | 0  | 1 |
| 80319 | CXXC4    | 0 | 0  | 1 |
| 80824 | DUSP16   | 0 | 0  | 1 |
| 80834 | TAS1R2   | 0 | 0  | 1 |
| 80835 | TAS1R1   | 0 | 0  | 1 |
| 81579 | PLA2G12A | 1 | 0  | 1 |
| 81607 | NECTIN4  | 0 | 0  | 1 |
| 83439 | TCF7L1   | 1 | 0  | 1 |
| 83700 | JAM3     | 1 | 0  | 1 |
| 83756 | TAS1R3   | 1 | 0  | 1 |

|        |          |   |    |   |
|--------|----------|---|----|---|
| 84134  | TOMM40L  | 0 | 0  | 1 |
| 84433  | CARD11   | 1 | 22 | 1 |
| 84441  | MAML2    | 1 | 18 | 1 |
| 84448  | ABLIM2   | 0 | 0  | 1 |
| 84552  | PARD6G   | 0 | 0  | 0 |
| 84612  | PARD6B   | 1 | 0  | 0 |
| 84647  | PLA2G12B | 0 | 0  | 0 |
| 84867  | PTPN5    | 0 | 0  | 1 |
| 85407  | NKD1     | 1 | 0  | 1 |
| 85409  | NKD2     | 0 | 0  | 1 |
| 85417  | CCNB3    | 0 | 19 | 1 |
| 85477  | SCIN     | 0 | 0  | 1 |
| 85480  | TSLP     | 0 | 0  | 1 |
| 90249  | UNC5A    | 1 | 0  | 1 |
| 113878 | DTX2     | 0 | 0  | 1 |
| 115653 | KIR3DL3  | 0 | 0  | 1 |
| 115727 | RASGRP4  | 0 | 0  | 1 |
| 116379 | IL22RA2  | 0 | 0  | 1 |
| 117157 | SH2D1B   | 0 | 0  | 1 |
| 122011 | CSNK1A1L | 0 | 0  | 1 |
| 122809 | SOCS4    | 0 | 0  | 1 |
| 128239 | IQGAP3   | 1 | 0  | 1 |
| 131873 | COL6A6   | 0 | 0  | 0 |
| 137970 | UNC5D    | 0 | 0  | 1 |
| 145957 | NRG4     | 0 | 0  | 1 |
| 149233 | IL23R    | 0 | 0  | 1 |
| 150084 | IGSF5    | 0 | 0  | 1 |
| 151636 | DTX3L    | 0 | 0  | 1 |
| 163702 | IFNLR1   | 0 | 0  | 1 |
| 196403 | DTX3     | 1 | 0  | 1 |
| 196883 | ADCY4    | 1 | 0  | 0 |
| 200576 | PIKFYVE  | 1 | 0  | 1 |
| 219699 | UNC5B    | 1 | 0  | 1 |
| 253314 | EIF4E1B  | 0 | 0  | 0 |
| 259285 | TAS2R39  | 0 | 0  | 0 |
| 259286 | TAS2R40  | 0 | 0  | 0 |
| 259287 | TAS2R41  | 0 | 0  | 0 |
| 259289 | TAS2R43  | 0 | 0  | 1 |
| 259290 | TAS2R31  | 0 | 0  | 0 |
| 259291 | TAS2R45  | 0 | 0  | 0 |
| 259292 | TAS2R46  | 0 | 0  | 1 |
| 259294 | TAS2R19  | 0 | 0  | 0 |
| 259295 | TAS2R20  | 0 | 0  | 0 |
| 259296 | TAS2R50  | 0 | 0  | 1 |
| 260425 | MAGI3    | 0 | 0  | 1 |
| 282616 | IFNL2    | 0 | 0  | 1 |
| 282617 | IFNL3    | 0 | 0  | 1 |
| 282618 | IFNL1    | 0 | 0  | 1 |
| 284217 | LAMA1    | 1 | 0  | 1 |
| 338376 | IFNE     | 0 | 0  | 1 |
| 338398 | TAS2R60  | 0 | 0  | 1 |
| 345456 | PFN3     | 0 | 0  | 0 |
| 353164 | TAS2R42  | 0 | 0  | 1 |
| 375189 | PFN4     | 0 | 0  | 0 |
| 375790 | AGRN     | 1 | 0  | 1 |

|        |         |   |   |   |
|--------|---------|---|---|---|
| 646048 | -       | 1 | 0 | 0 |
| 646821 | -       | 1 | 0 | 0 |
| 648921 | -       | 1 | 0 | 0 |
| 649853 | -       | 1 | 0 | 0 |
| 650832 | -       | 1 | 0 | 0 |
| 652346 | -       | 1 | 0 | 0 |
| 652671 | -       | 1 | 0 | 0 |
| 653361 | NCF1    | 1 | 0 | 1 |
| 653888 | -       | 1 | 0 | 0 |
| 728622 | SKP1P2  | 0 | 0 | 0 |
| 731751 | -       | 1 | 0 | 0 |
| 1E+08  | -       | 1 | 0 | 0 |
| 1E+08  | PLA2G4B | 0 | 0 | 1 |

## References

1. Kauffman, S.; Peterson, C.; Samuelsson, B.; Troein, C. Genetic networks with canalizing Boolean rules are always stable. *Proceedings of the National Academy of Sciences of the United States of America* **2004**, *101*, 17102-17107, doi:10.1073/pnas.0407783101.
2. Kauffman, S.; Peterson, C.; Samuelsson, B.; Troein, C. Random Boolean network models and the yeast transcriptional network. *Proceedings of the National Academy of Sciences* **2003**, *100*, 14796-14799, doi:10.1073/pnas.2036429100.
3. Samal, A.; Jain, S. The regulatory network of E. coli metabolism as a Boolean dynamical system exhibits both homeostasis and flexibility of response. *BMC Systems Biology* **2008**, *2*, 21, doi:10.1186/1752-0509-2-21.
4. Naldi, A.; Carneiro, J.; Chaouiya, C.; Thieffry, D. Diversity and Plasticity of Th Cell Types Predicted from Regulatory Network Modelling. *Plos Computational Biology* **2010**, *6*, e1000912, doi:10.1371/journal.pcbi.1000912.
5. Harris, S.E.; Sawhill, B.K.; Wuensche, A.; Kauffman, S. A model of transcriptional regulatory networks based on biases in the observed regulation rules. *Complexity* **2002**, *7*, 23-40, doi:10.1002/cplx.10022.
6. Trinh, H.C.; Kwon, Y.K. Edge-based sensitivity analysis of signaling networks by using Boolean dynamics. *Bioinformatics* **2016**, *32*, i763-i771. doi:10.1093/bioinformatics/btw464.
7. Trinh, H.-C.; Kwon, Y.-K. Effective Boolean dynamics analysis to identify functionally important genes in large-scale signaling networks. *Biosystems* **2015**, *137*, 64-72, doi:https://doi.org/10.1016/j.biosystems.2015.07.007.
8. Seoane, J.A.; Campbell, C.; Day, I.N.M.; Casas, J.P.; Gaunt, T.R. Canonical Correlation Analysis for Gene-Based Pleiotropy Discovery. *PLOS Computational Biology* **2014**, *10*, e1003876, doi:10.1371/journal.pcbi.1003876.
9. Mazaya, M.; Trinh, H.-C.; Kwon, Y.-K. Construction and analysis of gene-gene dynamics influence networks based on a Boolean model. *BMC Systems Biology* **2017**, *11*, 133, doi:10.1186/s12918-017-0509-y.
